# Supplementary material for: Shuffle off the classic β-Si elimination by Ni-NHC cooperation: implication for C–C forming reactions involving Ni-alkyl-β-silanes
Source: Royal Society of Chemistry journal article supplement (doi:10.1039/c1cc14593b), 2011-11-25
Supplement: c1cc14593b_2.pdf [file c1cc14593b_2.pdf]

NAME 12\_156 Ph t7  
EXPNO 1  
PROCNO 1  
Date\_ 20100407  
Time 18.23  
INSTRUM spect  
PROBHD 5 mm PABBJ 1H/  
PULPROG zg  
TD 65536  
SOLVENT CDCl3  
NS 2  
DS 0  
SWH 10000.000 Hz  
FIDRES 0.192588 Hz  
AQ 3.2768500 sec  
RG 25.4  
PR 50.000 usec  
PE 6.50 usec  
TE 294.6 K  
RL 2.00000000 sec  
TD0 1

===== CHANNEL f1 =====  
NUC1 1H  
P1 7.10 usec  
PL1 -2.00 dB  
F1LW 13.17734718 W  
SFO1 400.1316005 MHz  
SI 65536  
SF 400.1300072 MHz  
WDW EM  
SSB 0  
LB 0.30 Hz  
GB 0  
PC 1.00

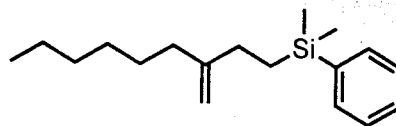

Me<sub>2</sub>PhSi ~~~~ n-hex

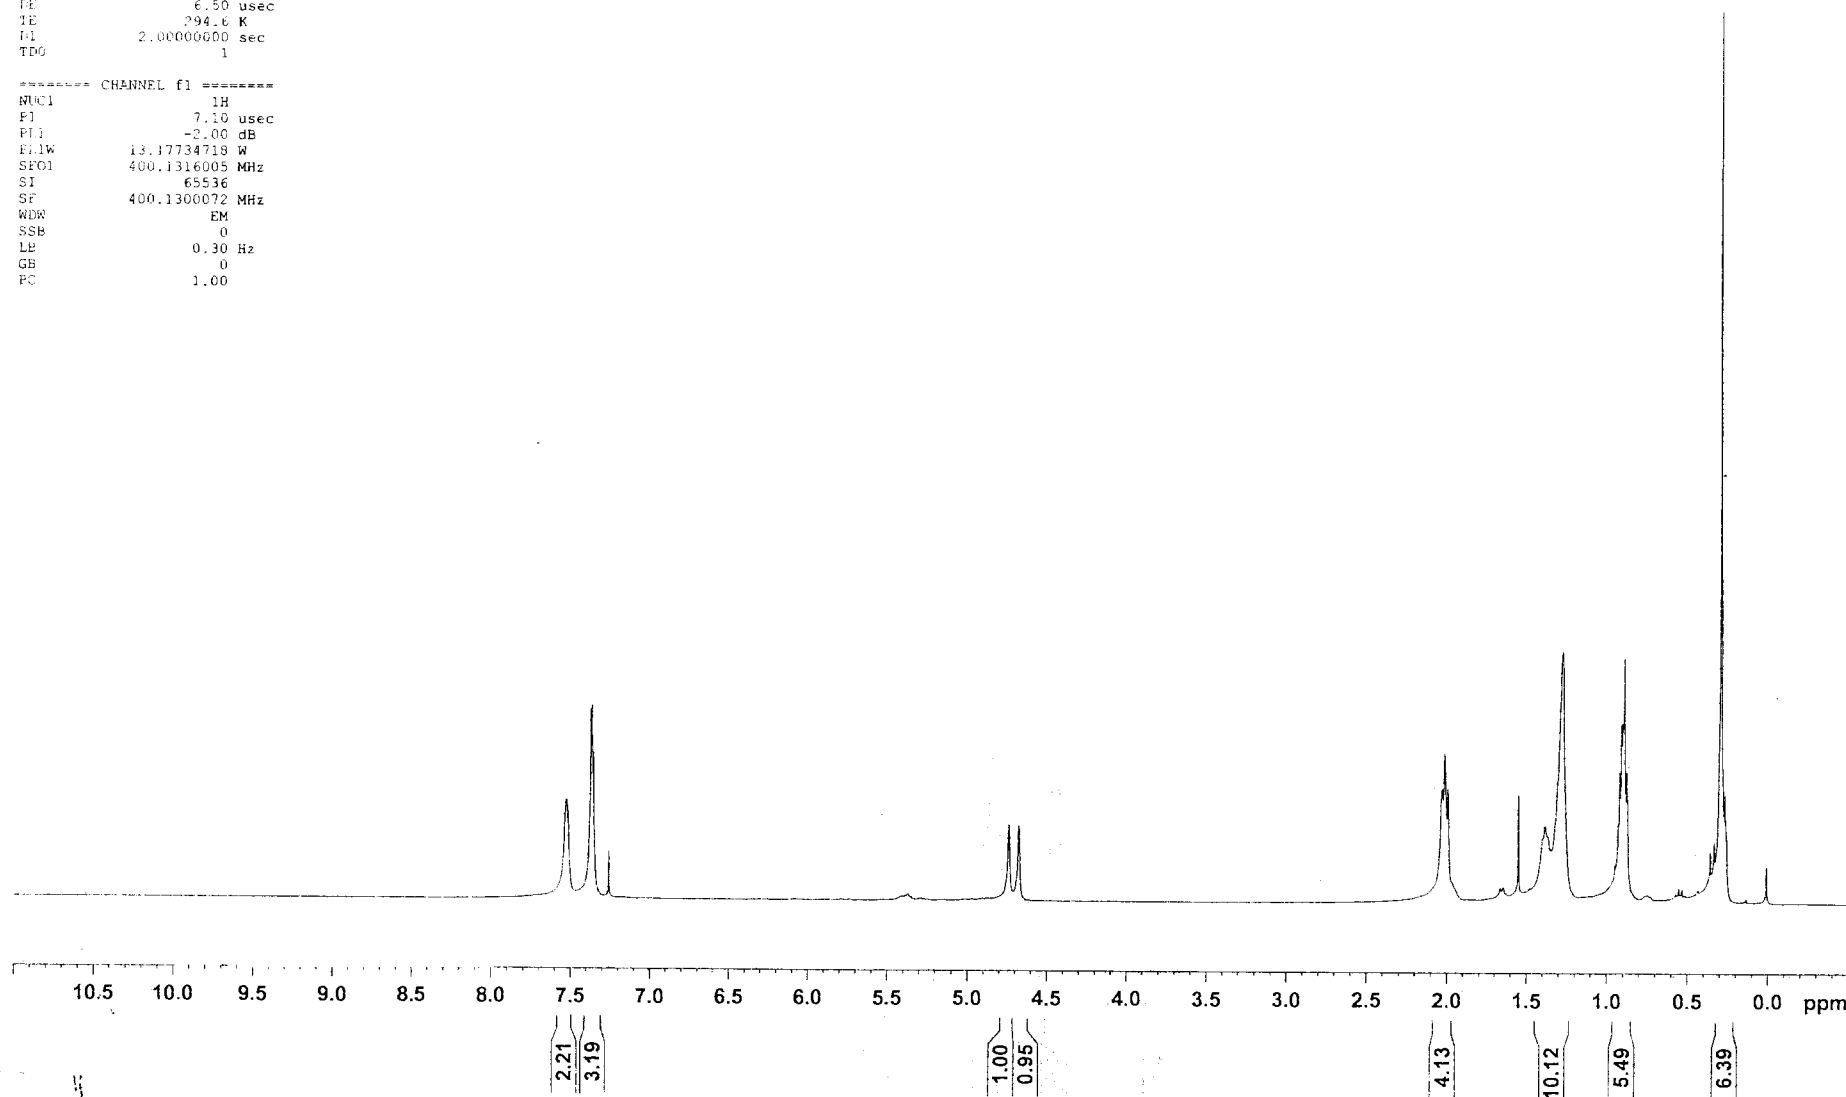

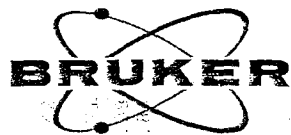

NAME 12\_156 Ph t10  
EXPNO 2  
PROCNO 1  
Date\_ 20100407  
Time 18.19  
INSTRUM spect  
PROBHD 5 mm PABBI 1H/  
PULPROG zgpg30  
TD 65536  
SOLVENT CDCl3  
NS 17  
DS 4  
SWH 24039.461 Hz  
FIDRES 0.366798 Hz  
AQ 1.3631988 sec  
RG 203  
DW 20.800 usec  
DE 6.50 usec  
TE 294.9 K  
D1 2.00000000 sec  
D11 0.03000000 sec  
TD0 1

===== CHANNEL f1 =====  
NUC1 13C  
P1 14.50 usec  
PL1 -4.00 dB  
PL1W 99.22689819 W  
SFO1 100.6228298 MHz

===== CHANNEL f2 =====  
CPDPRG2 waltz16  
NUC2 1H  
PCPD2 80.00 usec  
PL2 -2.00 dB  
PL12 18.80 dB  
PL13 18.80 dB  
PL2W 13.17734718 W  
PL12W 0.10960442 W  
PL13W 0.10960442 W  
SFO2 400.1316005 MHz  
SI 32768  
SF 100.6127574 MHz  
WDW EM  
SSB 0  
LB 1.00 Hz  
GB 0  
PC 1.40

152.66  
139.42  
133.71  
128.98  
127.88  
107.51  
77.48  
77.16  
76.84  
35.97  
31.93  
30.23  
29.29  
27.91  
22.79  
14.27  
13.91  
-2.97

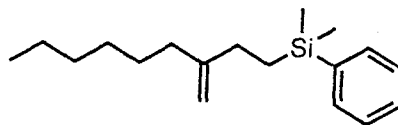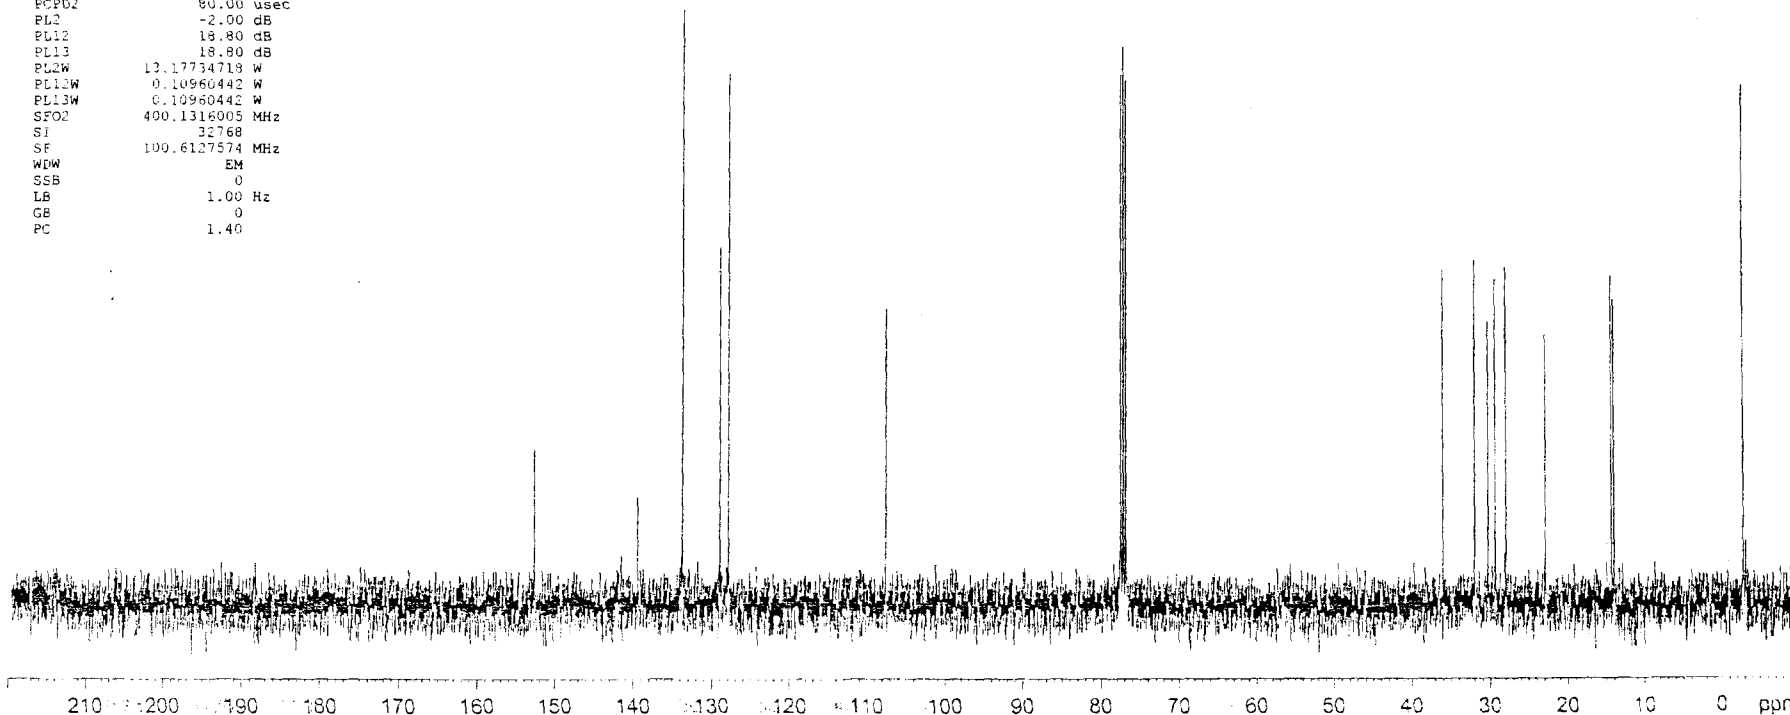

NAME 12\_142 t11 pdt  
EXPNO 1  
PROCNO 1  
Date\_ 20100310  
Time 13.24  
INSTRUM spect  
PROBHD 5 mm PABUL 13C  
PULPROG zgpg30  
TD 65536  
SOLVENT CDCl3  
NS 3  
DS 0  
SWH 10000.000 Hz  
FIDRES 0.152588 Hz  
AQ 3.2768500 sec  
RG 144  
DM 50.000 usec  
DE 6.50 usec  
TE 295.4 K  
D1 5.00000000 sec  
TD0 1

===== CHANNEL f1 =====  
NUC1 1H  
P1 14.83 usec  
PL1 0.00 dB  
PL1W 8.31434441 W  
SFO1 400.1316005 MHz  
SI 65536  
SF 400.1300339 MHz  
WDW EM  
SSE 0  
LB 0.30 Hz  
GB 0  
PC 1.00

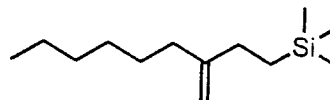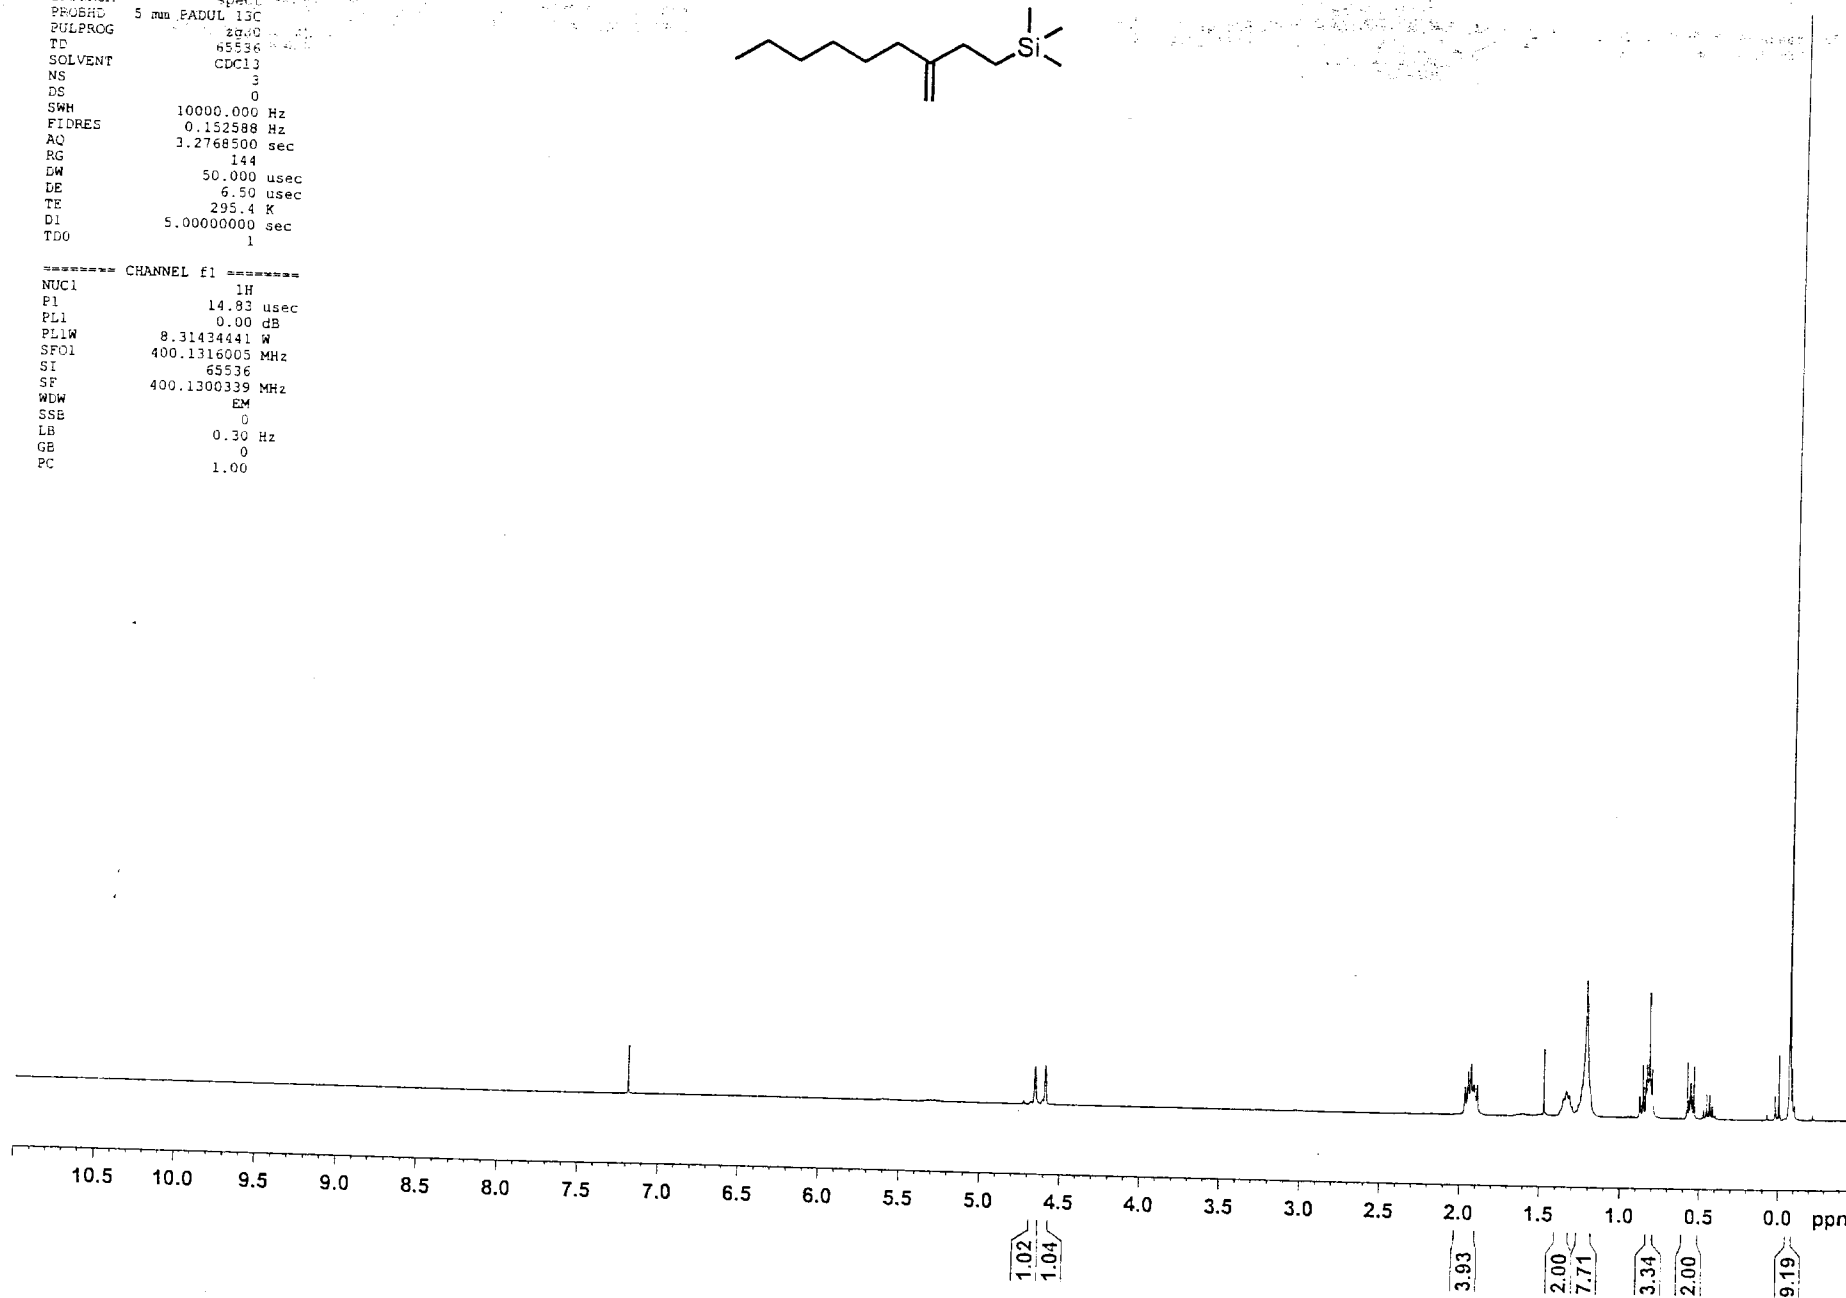

12-142 t11 pdt. 7MS n-hex.

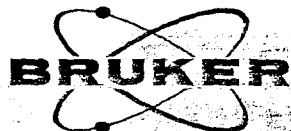

NAME 12\_142 t11 pdr  
EXPNO 2  
PROCNO 1  
Date\_ 20100310  
Time\_ 13.27  
INSTRUM spect  
PROBHD 5 mm PADUL 13C  
PULPROG zgpg30  
TD 65536  
SOLVENT CDCl3  
NS 36  
DS 4  
SWH 24038.461 Hz  
FIDRES 0.366798 Hz  
AQ 1.3631988 sec  
RG 203  
DW 20.800 usec  
DE 6.50 usec  
TE 296.0 K  
D1 2.00000000 sec  
D11 0.03000000 sec  
TDO 1

===== CHANNEL f1 =====  
NUC1 13C  
P1 9.68 usec  
PL1 -0.60 dB  
PL1W 41.24164963 W  
SFO1 100.6228298 MHz

===== CHANNEL f2 =====  
CPDPRG2 waltz16  
NUC2 1H  
PCPD2 90.00 usec  
PL2 0.00 dB  
PL12 15.66 dB  
PL13 15.92 dB  
PL2W 8.31434441 W  
PL12W 0.22585411 W  
PL13W 0.21272963 W  
SFO2 400.1316005 MHz  
S1 32768  
SF 100.6127534 MHz  
WDW EM  
SSB 0  
LB 1.00 Hz  
GB 0  
PC 1.40

153.00

107.34

77.48  
77.16  
76.84

35.99  
31.96  
30.32  
29.33  
27.97  
22.81

14.87  
14.27

-1.60

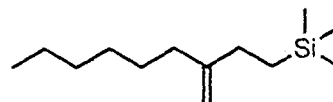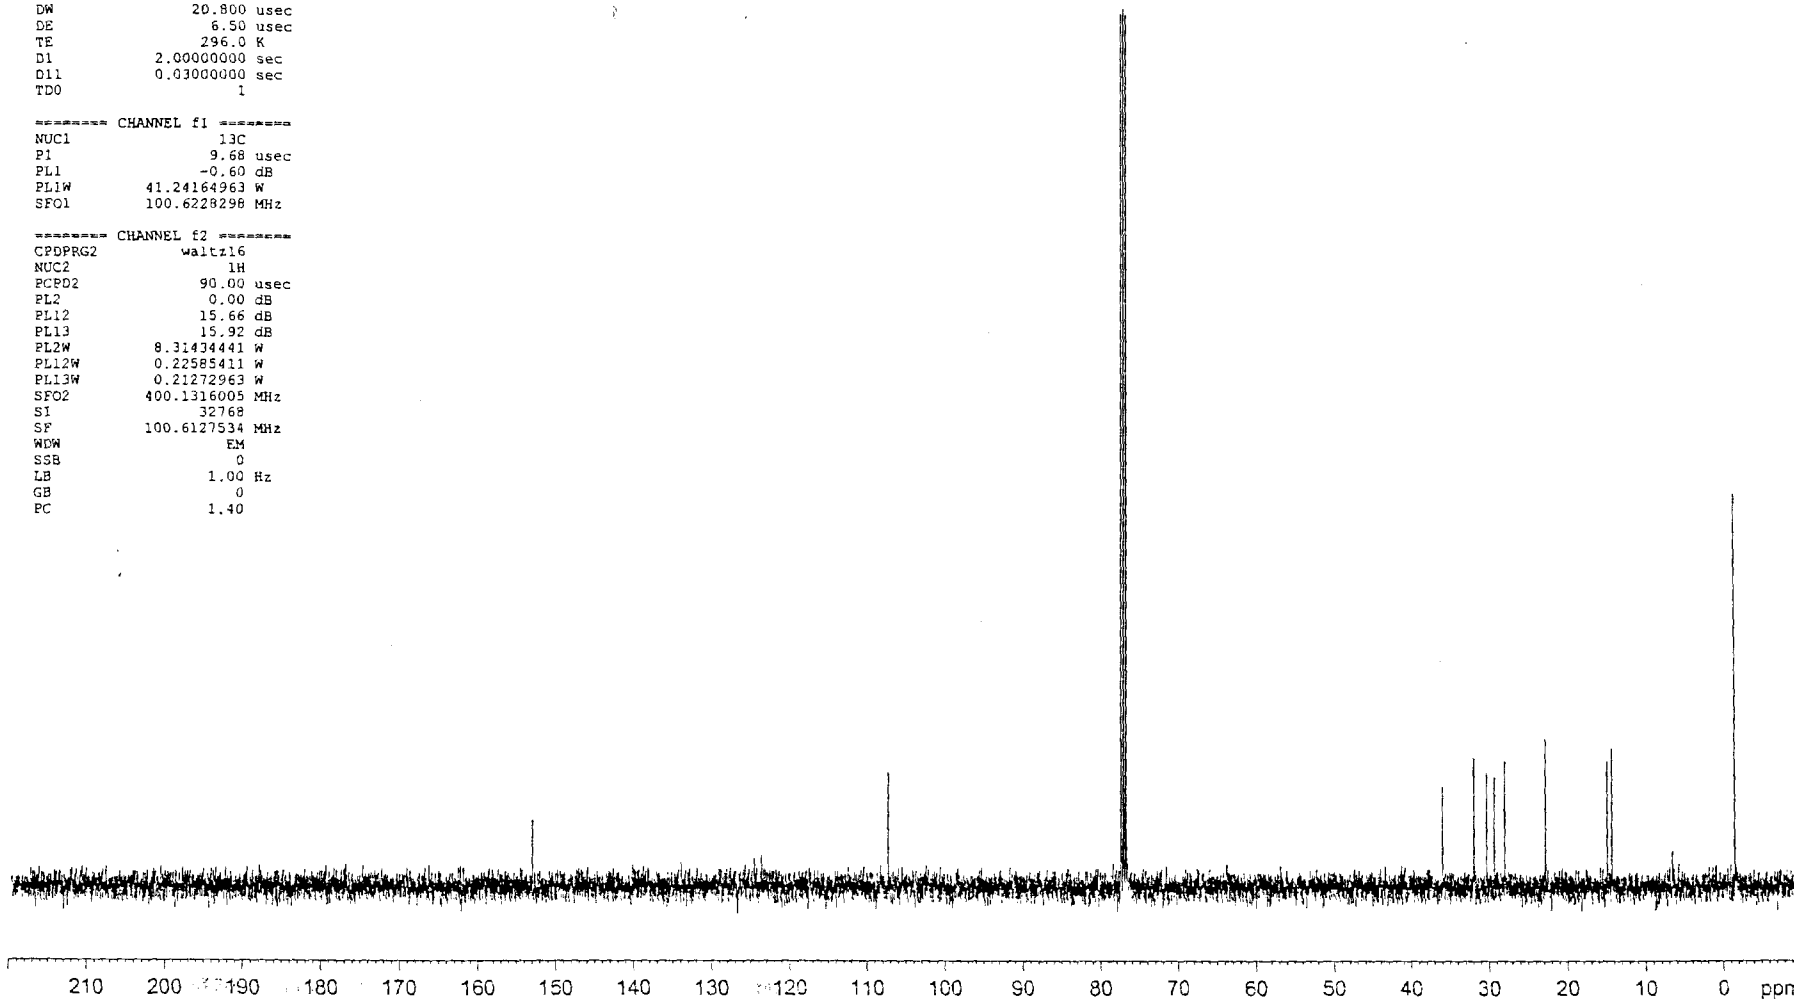

NAME hls-2-TES t11,12  
EXPNO 11  
PROCNO 1  
Date\_ 20100903  
Time 13.22  
INSTRUM spect  
PROBHD 5 mm PABBO BB-  
PULPROG zg30  
TD 65536  
SOLVENT CDCl3  
NS 3  
DS 2  
SWH 8223.685 Hz  
FIDRES 0.125483 Hz  
AQ 3.9846387 sec  
RG 4  
DW 60.800 usec  
DE 6.50 usec  
TE 297.8 K  
D1 1.00000000 sec  
TDO 1

----- CHANNEL f1 -----  
NUC1 1H  
P1 14.00 usec  
PL1 -1.00 dB  
PL1W 13.56617069 W  
SFO1 400.1924713 MHz  
SI 32768  
SF 400.1900147 MHz  
WDW EM  
SSB 0  
LB 0.30 Hz  
GB 0  
PC 1.00

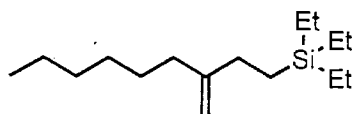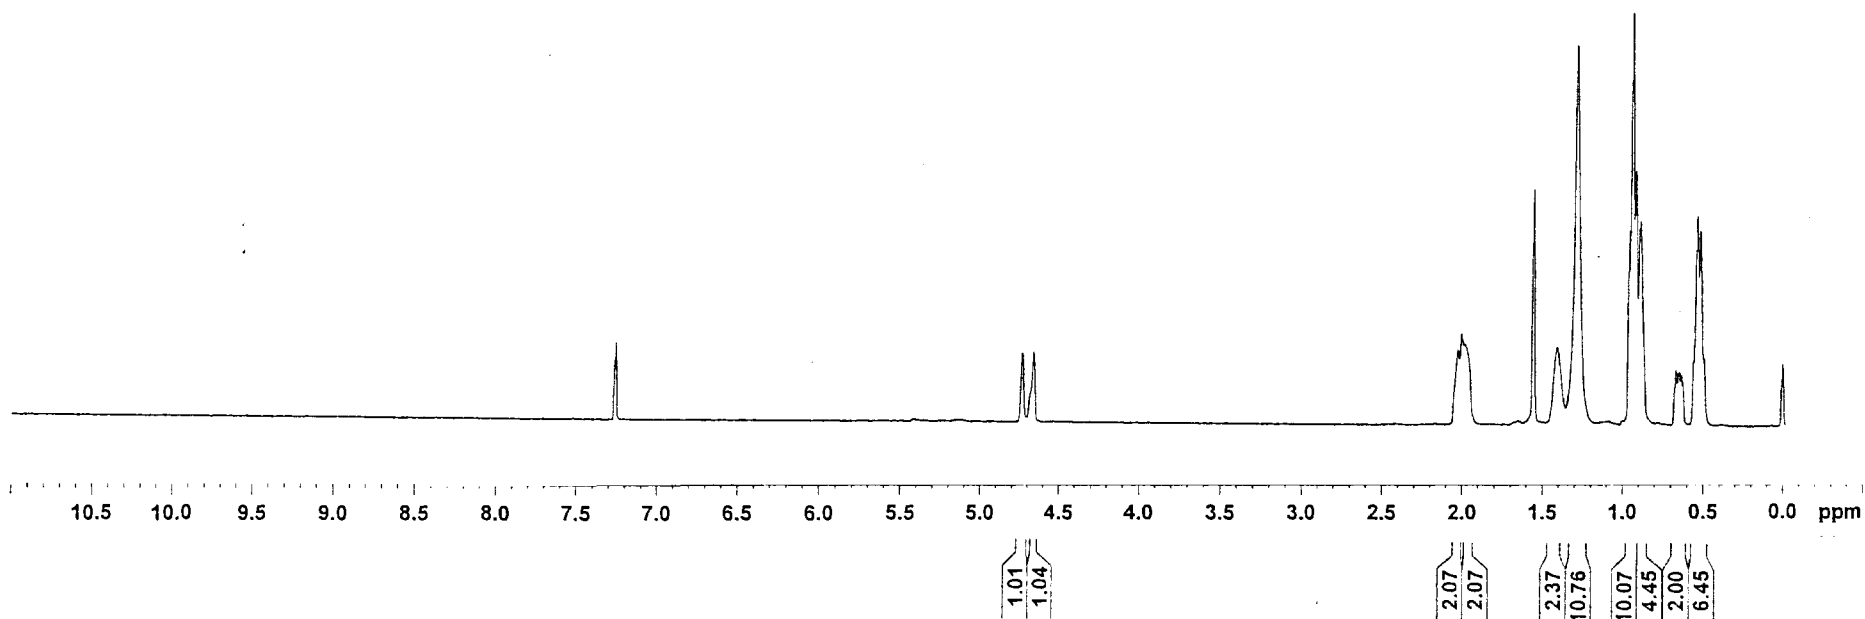

EtSi(CH<sub>3</sub>)<sub>3</sub>-n-hex

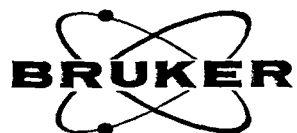

NAME his-2-TES t11.12  
EXNO 22  
PROCNO 1  
Date\_ 20100903  
Time 13.13  
INSTRUM spect  
PROBHD 5 mm PABBO BB-  
PULPROG zgpg30  
TD 65536  
SOLVENT CDCl3  
NS 48  
DS 4  
SWH 24038.461 Hz  
FIDRES 0.366798 Hz  
AQ 1.3631988 sec  
RG 203  
DW 20.800 usec  
DE 6.50 usec  
TE 298.0 K  
D1 2.00000000 sec  
D11 0.03000000 sec  
TD0 1

----- CHANNEL f1 -----  
NUC1 13C  
P1 9.90 usec  
PL1 -2.00 dB  
PL1W 55.33689499 W  
SFO1 100.6379183 MHz

----- CHANNEL f2 -----  
CPDPRG2 waltz16  
NUC2 1H  
PCPD2 90.00 usec  
PL2 -1.00 dB  
PL12 15.16 dB  
PL13 18.62 dB  
PL2W 13.56617069 W  
PL12W 0.32844096 W  
PL13W 0.14806664 W  
SFO2 400.1916008 MHz  
SI 32768  
SF 100.6278419 MHz  
WDM EM  
SSB 0  
LB 1.00 Hz  
GB 0  
PC 1.40

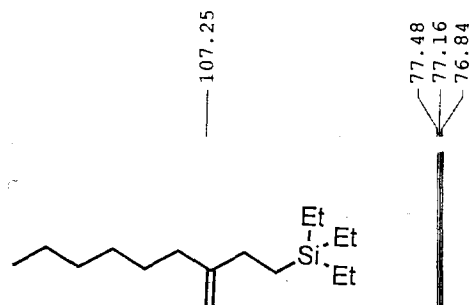

35.91  
31.95  
30.25  
29.31  
27.98  
22.80  
14.25  
9.76  
7.60  
3.40

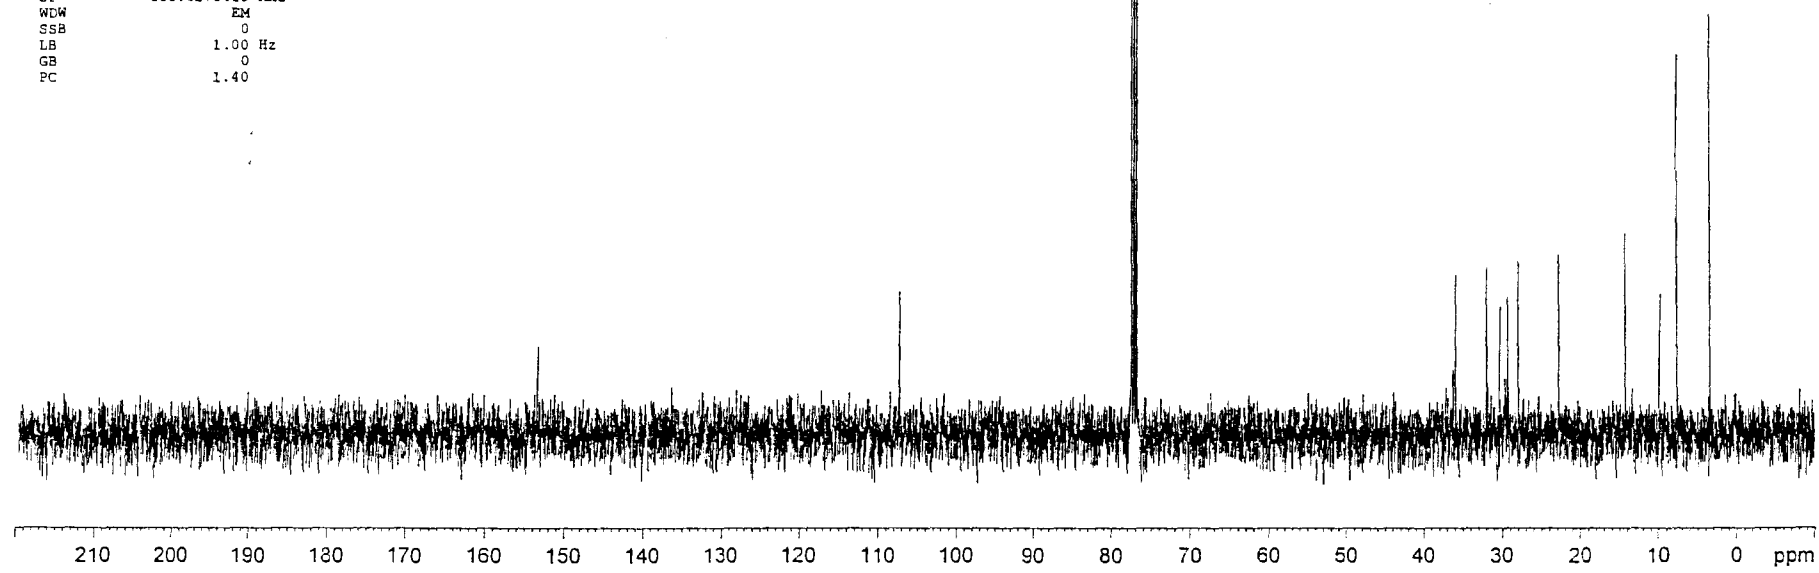

EtSi(CH<sub>3</sub>)<sub>3</sub> n-hex

NAME 12\_196 OMe c26  
EXPNO 11  
PROCNO 1  
Date\_ 2010040  
Time 18.55  
INSTRUM spect  
PROBHD 5 mm PAB61 1H/  
PULPROG zg  
TE 65536  
SOLVENT CDCl3  
NS 3  
DS 0  
SWH 10000.000 Hz  
FIDRES 0.152588 Hz  
AQ 3.2768500 sec  
RG 64  
DW 50.000 usec  
DE 6.50 usec  
TE 294.6 K  
D1 10.00000000 sec  
TD0 1

d1 = 10

----- CHANNEL f1 -----  
NUC1 1H  
P1 7.10 usec  
PL1 -2.00 dB  
PL1W 13.17734718 W  
SF01 400.1316005 MHz  
SI 65536  
SF 400.1300033 MHz  
WDW EM  
SSB 0  
LB 0.30 Hz  
GB 0  
PC 1.00

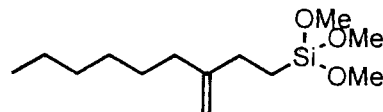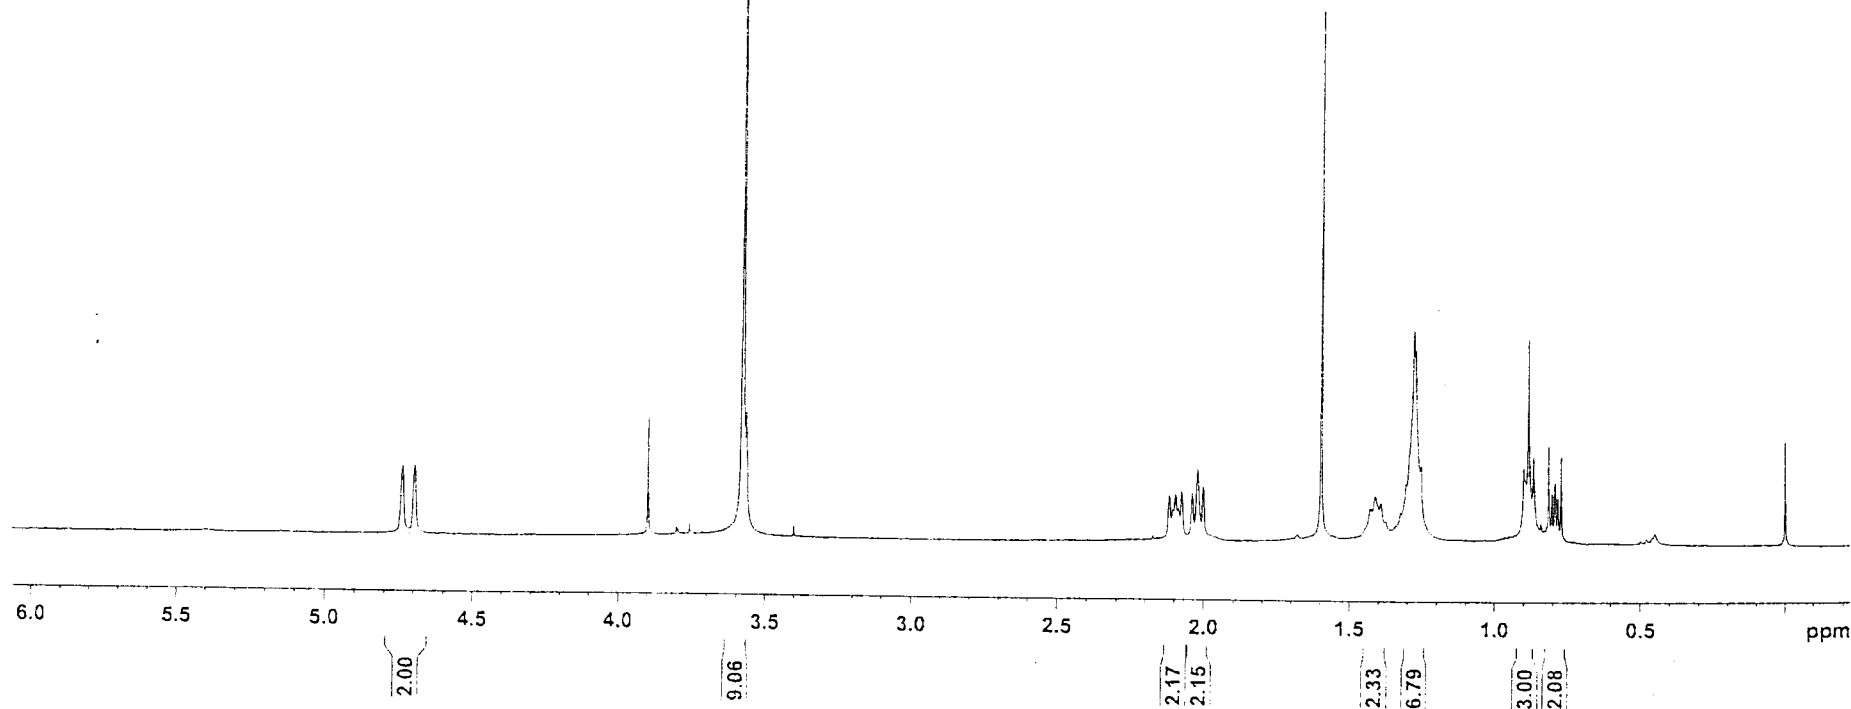

(MeO)<sub>3</sub>Si-CH<sub>2</sub>-CH=CH-CH<sub>2</sub>-CH<sub>2</sub>-CH<sub>2</sub>-CH<sub>3</sub>

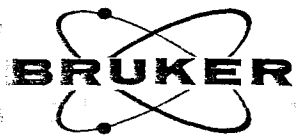

```

NAME      12_156 OMe t06
EXPNO     2
PROCNO    1
Date_     20100407
Time      18.44
INSTRUM   spect
PROBHD    5 mm PABBI 1H/
PULPROG   zgpg30
TD        65536
SOLVENT   CDCl3
NS        175
DS        4
SWH       24038.461 Hz
FIDRES    0.366798 Hz
AQ        1.3631988 sec
RG        203
DW        20.800 usec
DE        6.50 usec
TE        294.9 K
D1        2.00000000 sec
D11       0.03000000 sec
T0        1
  
```

```

===== CHANNEL f1 =====
NUC1       13C
P1         14.50 usec
PL1        -4.00 dB
PL1W       90.22689819 W
SFO1       100.6228298 MHz
  
```

```

===== CHANNEL f2 =====
CPDPRG2    waltz16
NUC2       1H
PCPD2      80.00 usec
PL2        -2.00 dB
PL12       19.90 dB
PL13       18.80 dB
PL2W       13.17734718 W
PL12W      0.10960442 W
PL13W      0.10960442 W
SFO2       400.1316005 MHz
SI         32768
SF         100.6127546 MHz
WDW        EM
SSB        0
LB         1.00 Hz
GB         0
PC         1.40
  
```

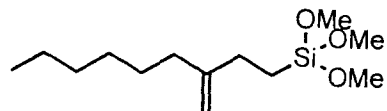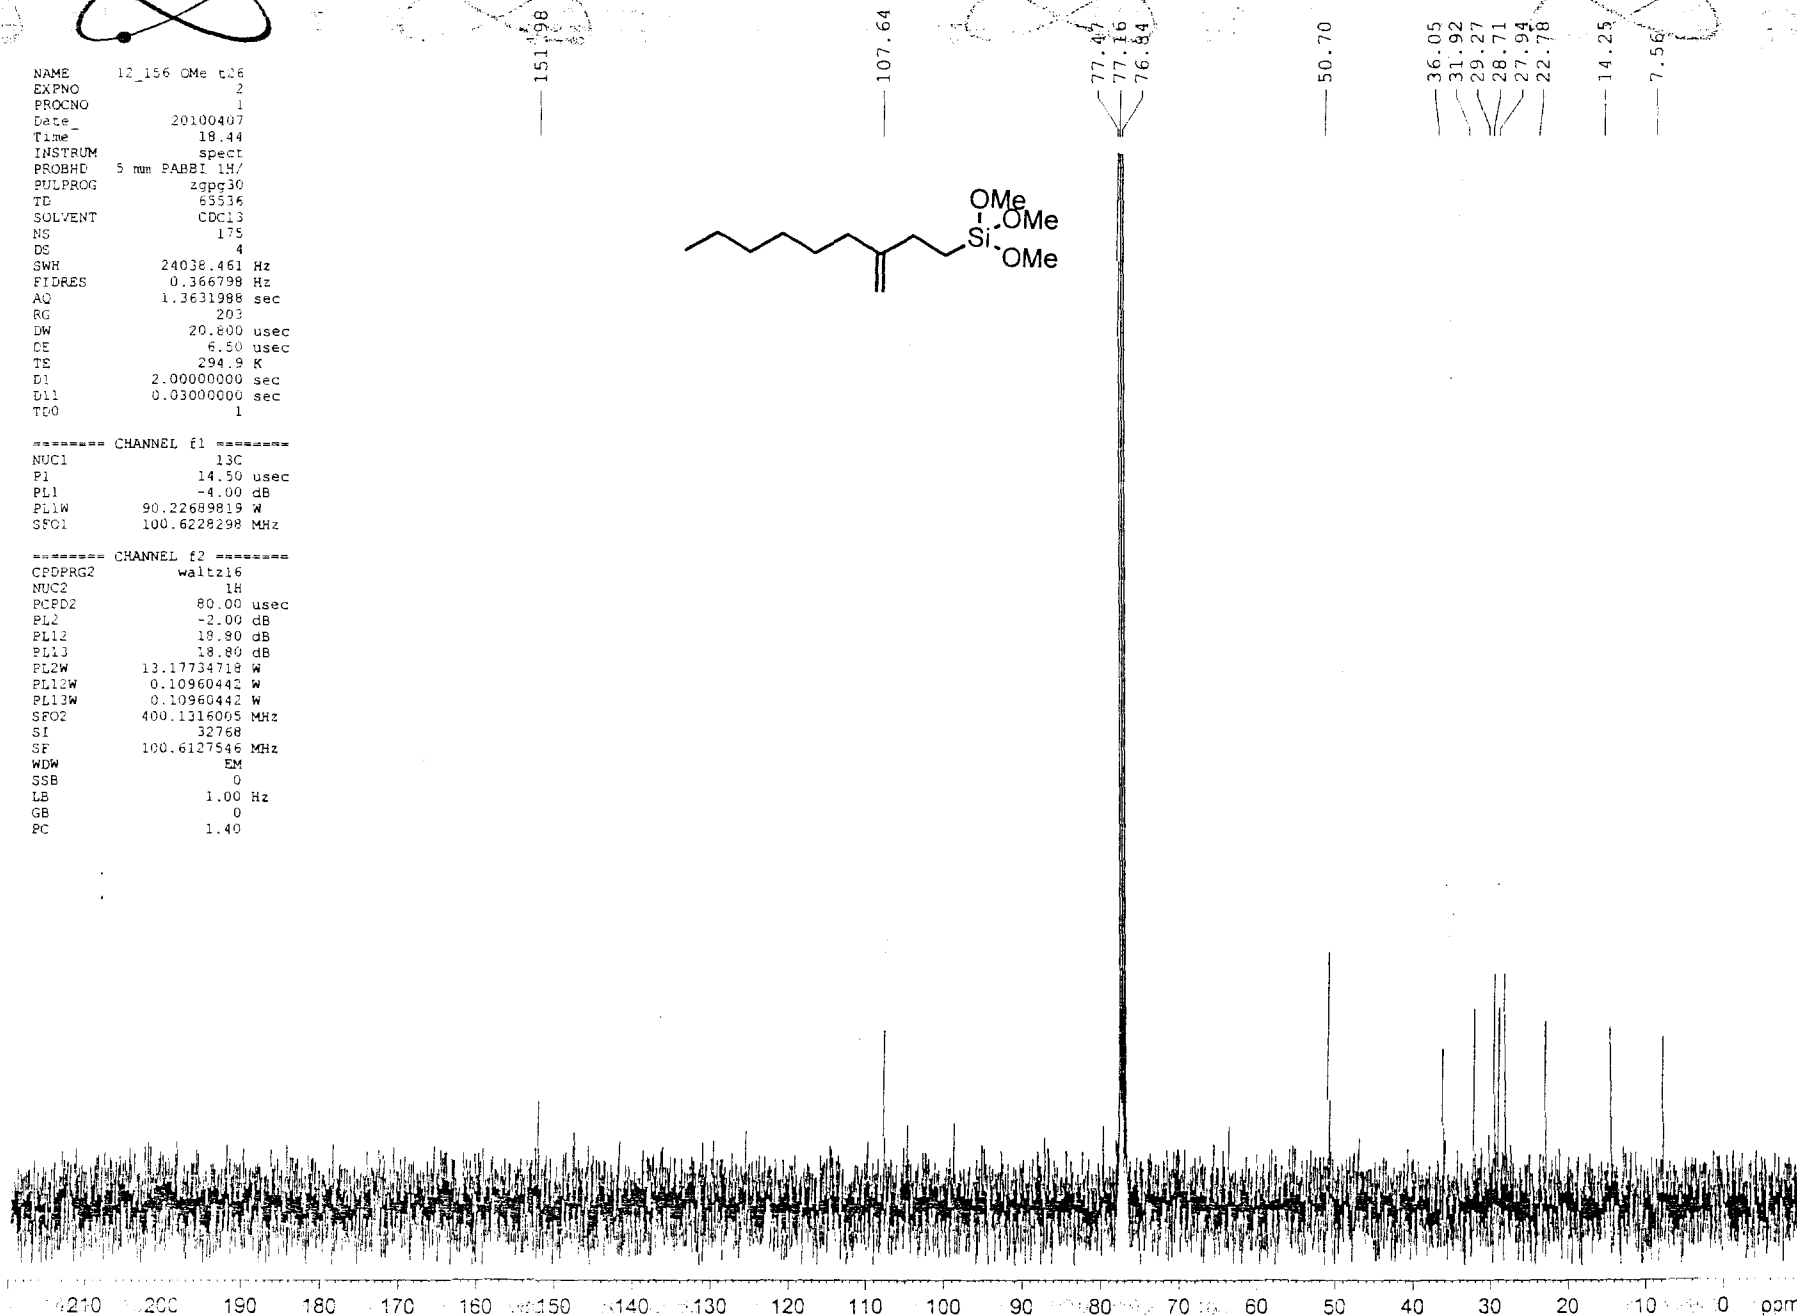



NAME hls-i-248-7a-t61  
EXPNO 1  
PROCNO 1  
Date\_ 20100621  
Time\_ 21.17  
INSTRUM spect  
PROBHD 5 mm PABBI 1H/  
PULPROG zg30  
TD 65536  
SOLVENT CDCl3  
NS 1  
DS 0  
SWH 10000.000 Hz  
FIDRES 0.152588 Hz  
AQ 3.2768500 sec  
RG 45.2  
DW 50.000 usec  
DE 6.50 usec  
TE 294.3 K  
D1 5.00000000 sec  
TD0 1

===== CHANNEL f1 =====  
NUC1 1H  
P1 7.10 usec  
PL1 -2.00 dB  
PL1W 13.17734718 W  
SFO1 400.1316005 MHz  
SI 65536  
SF 400.1300018 MHz  
WDW EM  
SSB 0  
LB 0.30 Hz  
GB 0  
PC 1.00

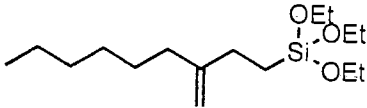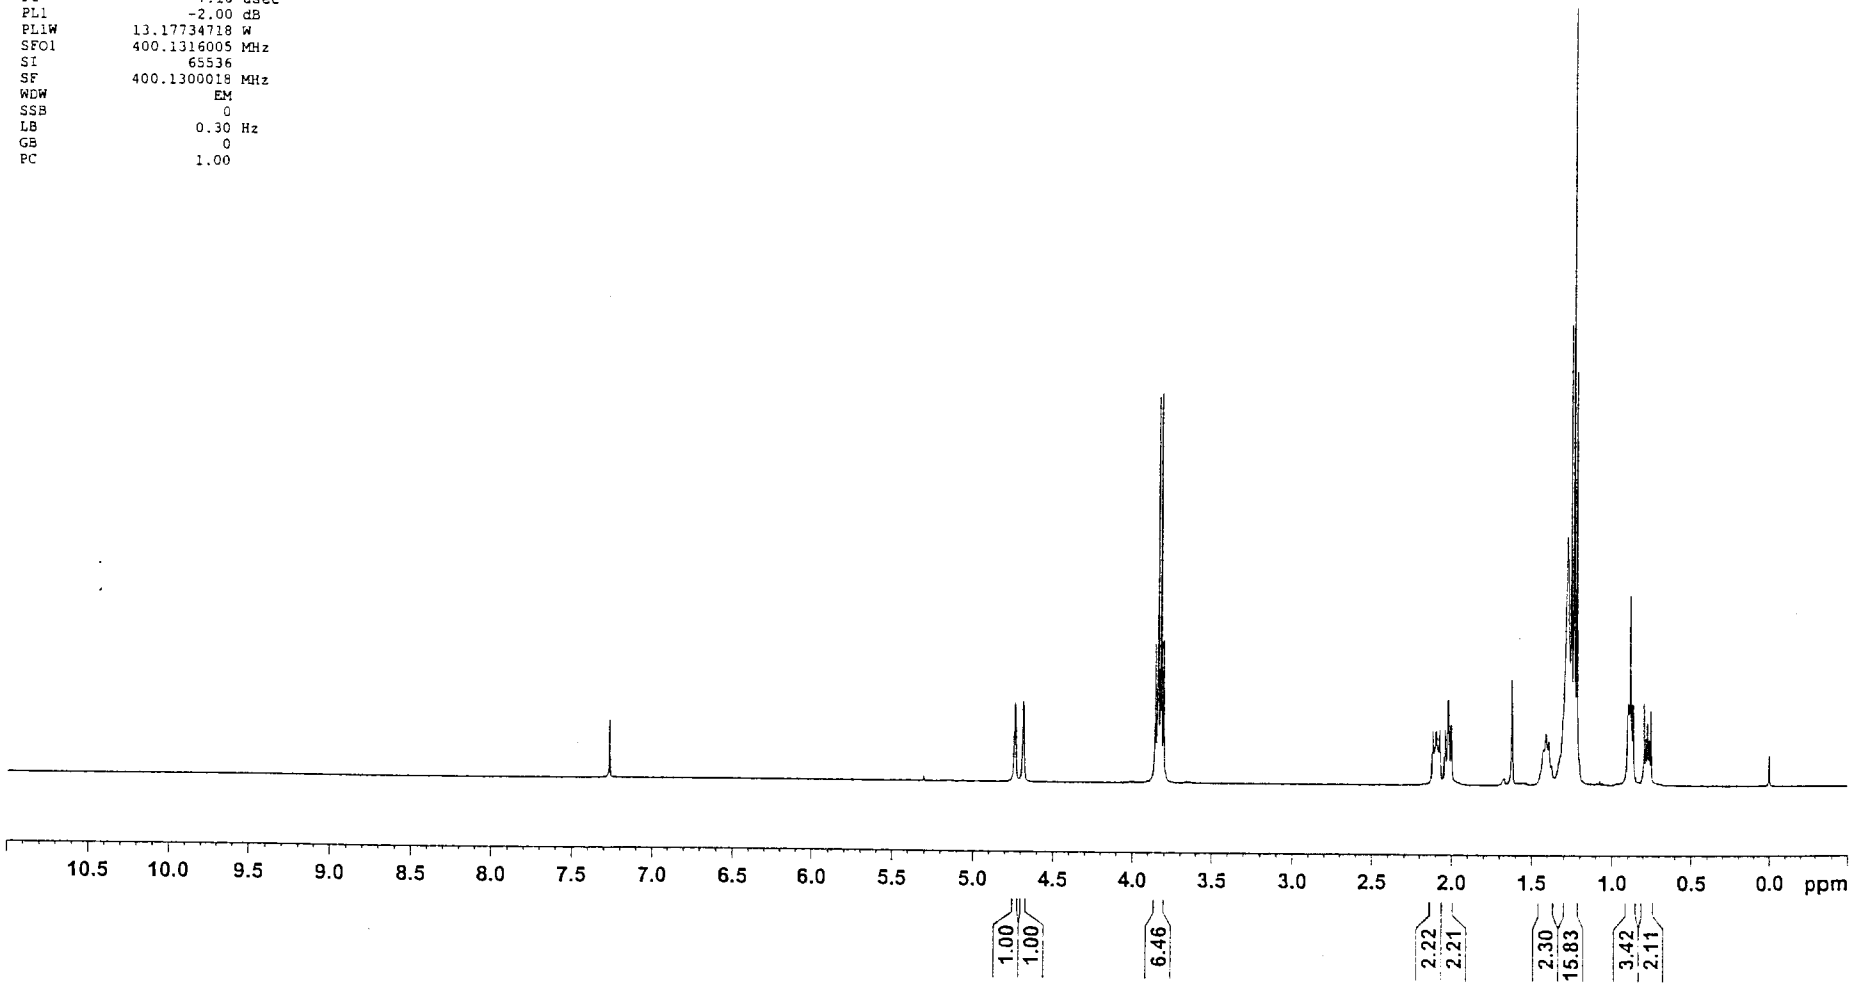

```

***** CHANNEL f2 *****
C2DPRG2          wait:16
NUC2              1M
PCPD2            80.00 usec
PL2              -2.00 dB
PL12             18.80 dB
PL13             18.80 dB
PL2W             13.17734718 W
PL12W            0.10960442 W
PL13W            0.10960442 W
SFO2             400.1316005 MHz
SI               32768
SF               100.6127539 MHz
WDW              EM
SSB              0
LB               1.00 Hz
GB               0
PC               1.40

```

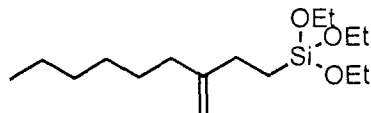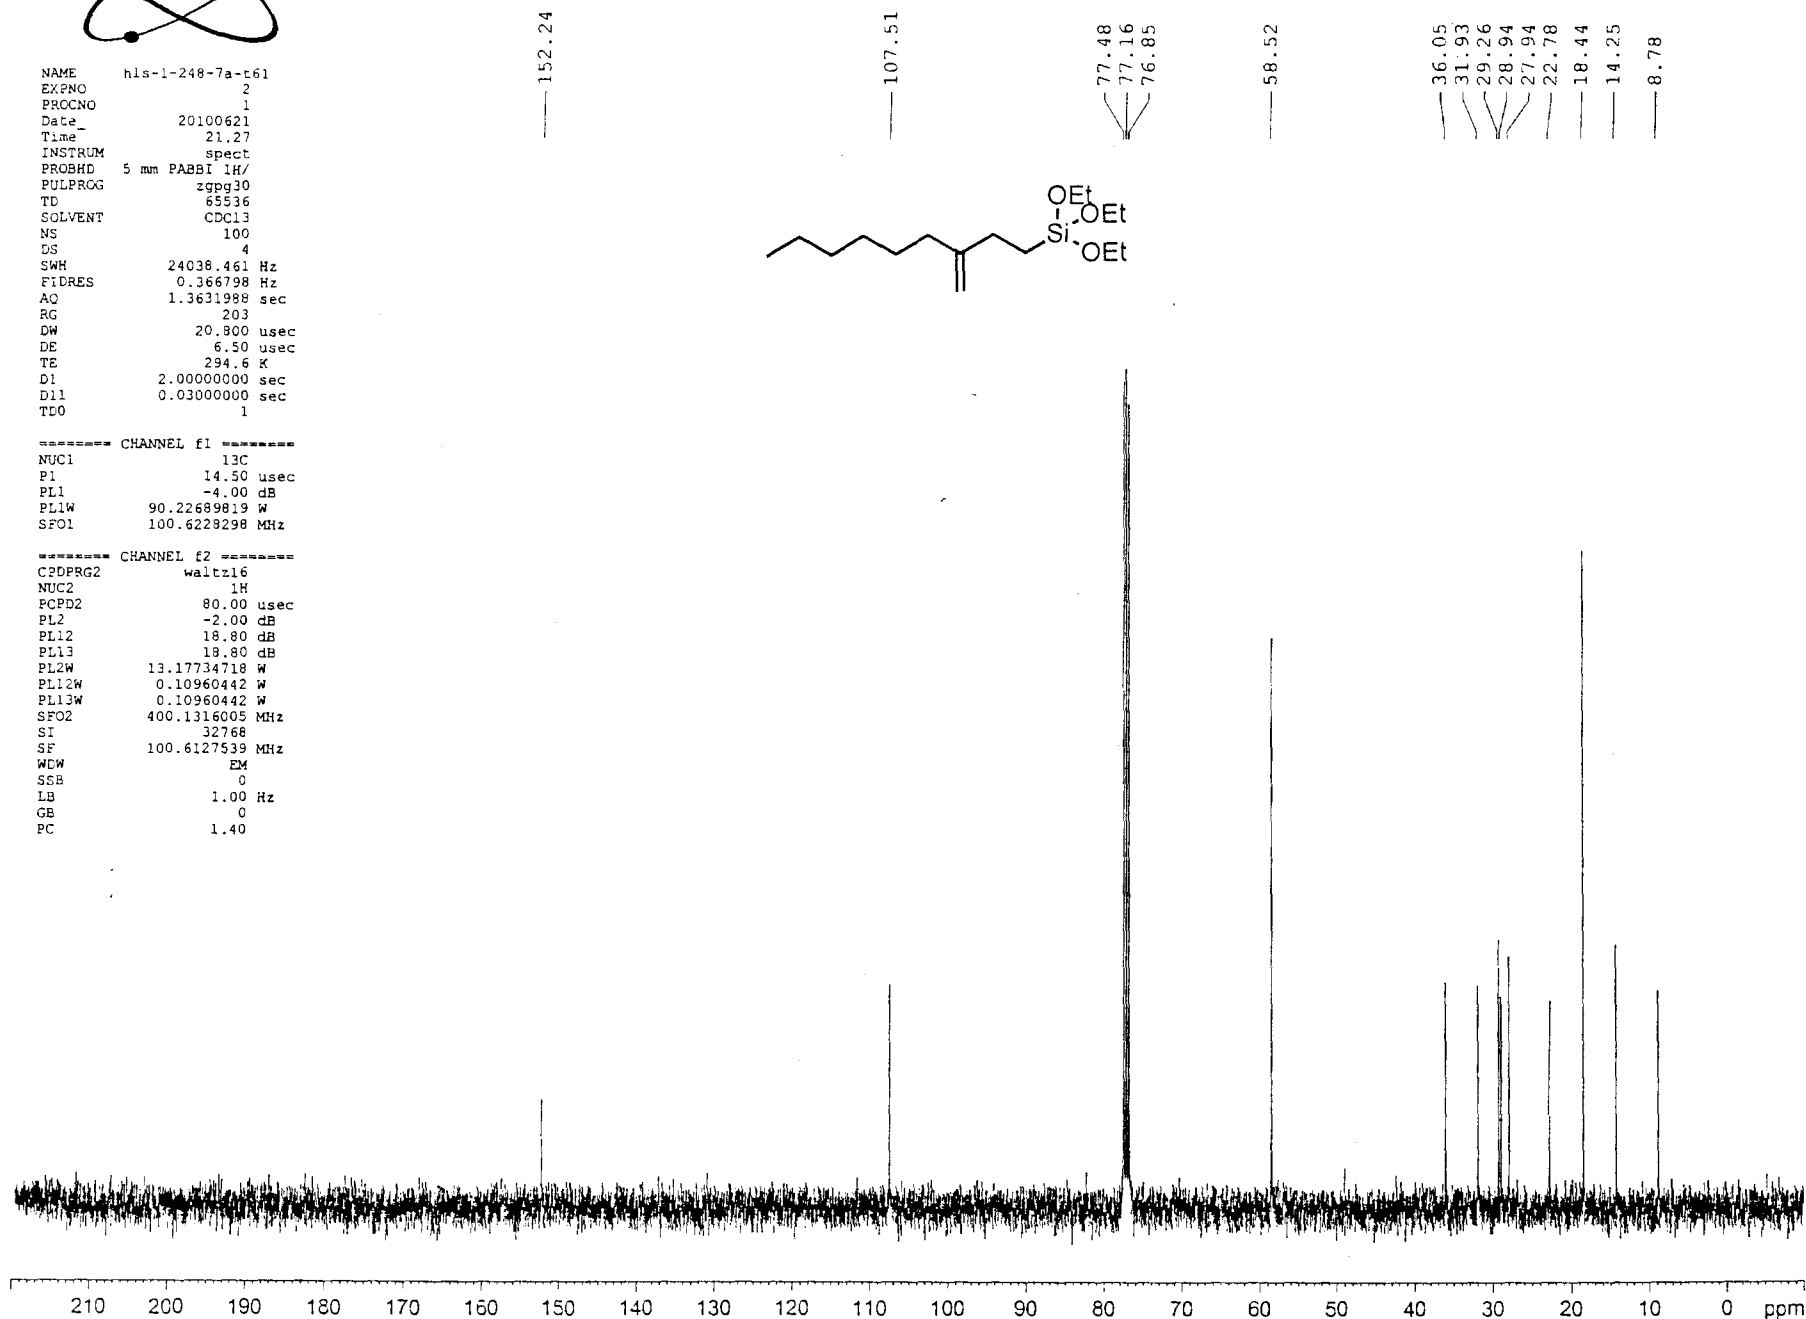

NAME hls-2-3-1-t25  
EXPNO 1  
PROCNO 1  
Date\_ 20100806  
Time 20.32  
INSTRUM spect  
PROBHD 5 mm PABBI 1H/  
PULPROG zg30  
TD 65536  
SOLVENT CDCl3  
NS 3  
DS 0  
SWH 10000.000 Hz  
FIDRES 0.152588 Hz  
AQ 3.2768500 sec  
RG 71.8  
DW 50.000 usec  
DE 6.50 usec  
TE 294.3 K  
D1 5.00000000 sec  
TD0 1

===== CHANNEL f1 =====  
NUC1 1H  
P1 7.10 usec  
PL1 -2.00 dB  
PL1W 13.17734718 W  
SFO1 400.1316005 MHz  
SI 65536  
SF 400.1300031 MHz  
WDW EM  
SSB 0  
LB 0.30 Hz  
GB 0  
PC 1.00

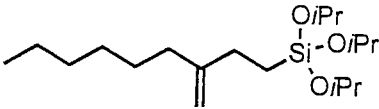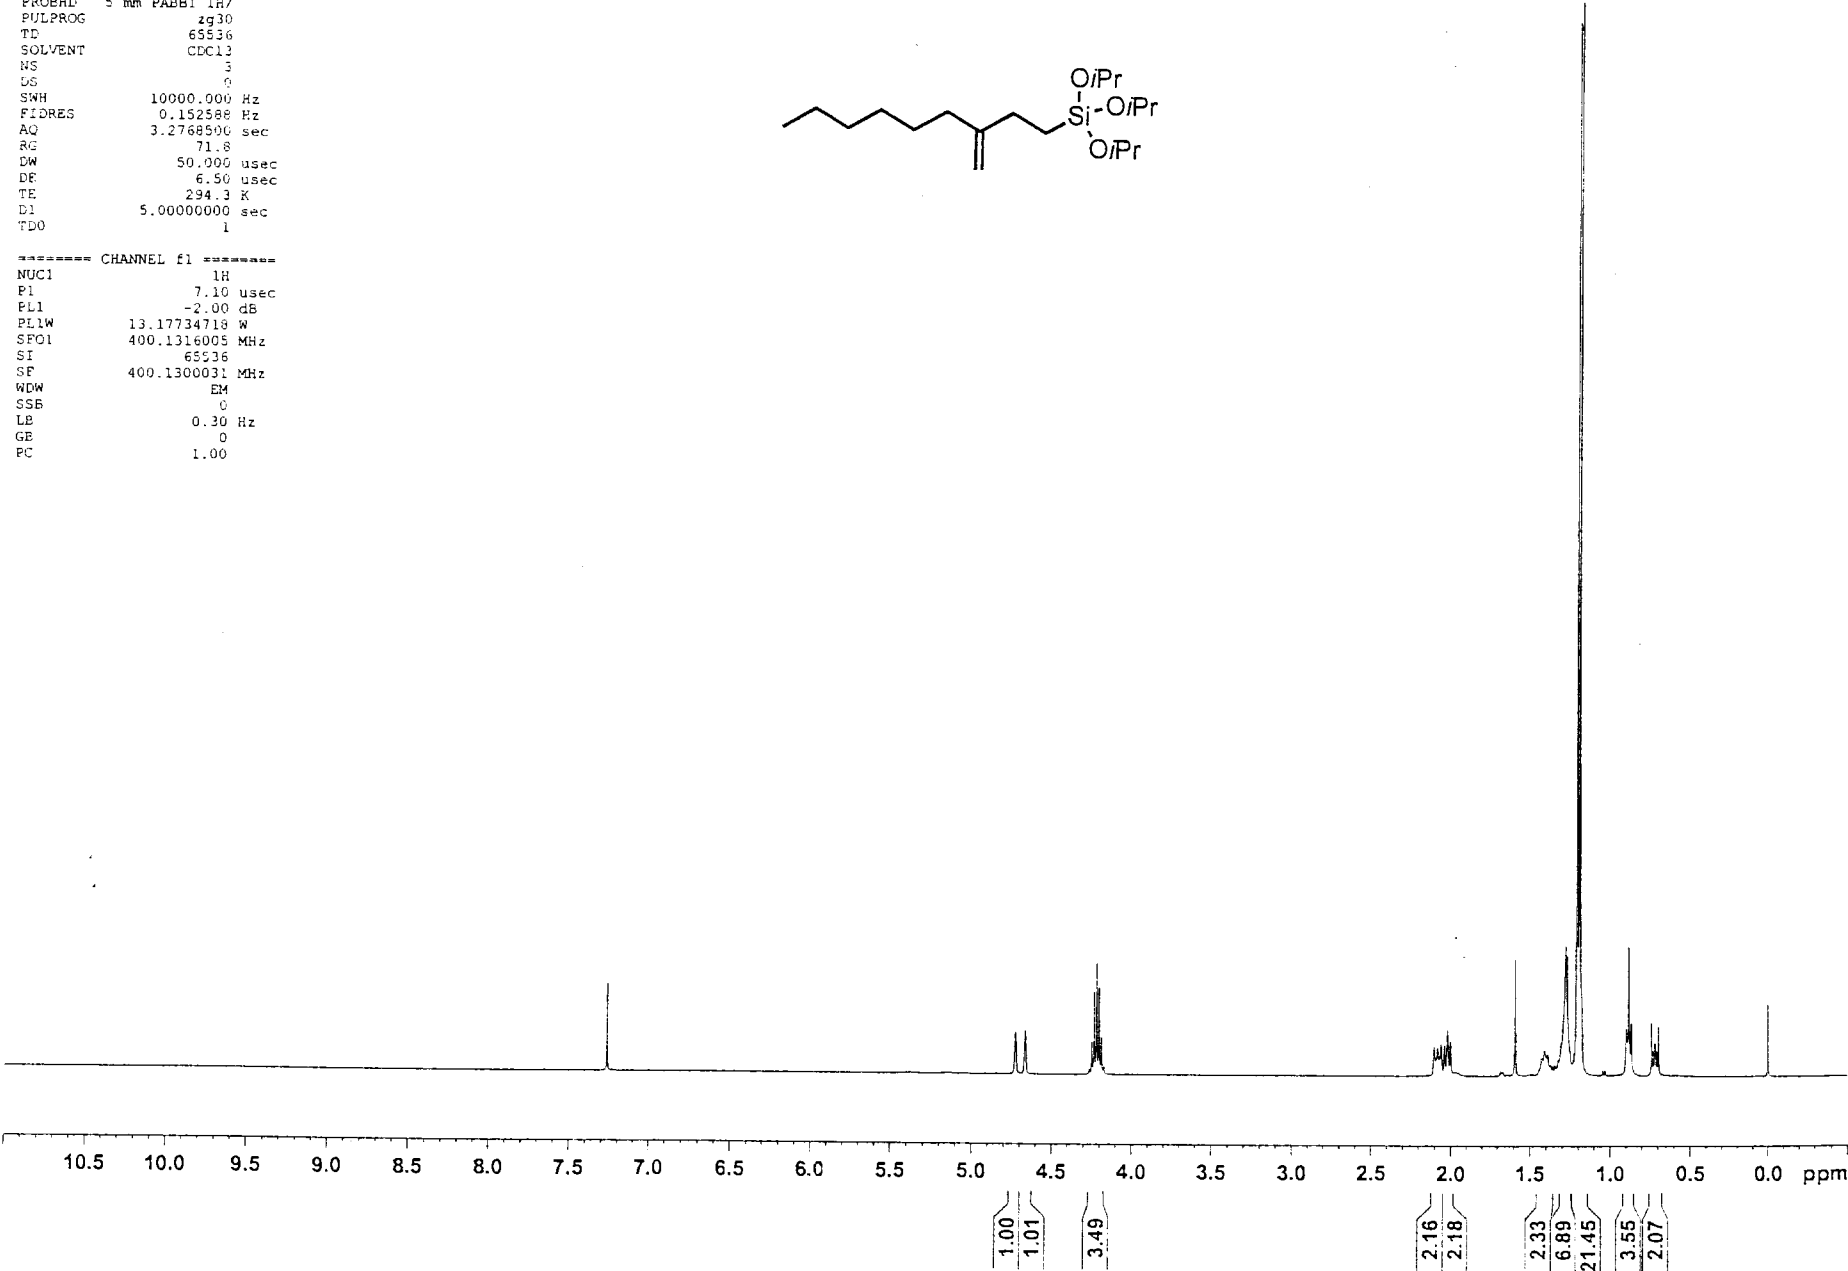

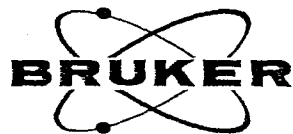

NAME his-2-3-1-t25  
EXPNO 2  
PROCNO 1  
Date\_ 20100806  
Time 18.19  
INSTRUM spect  
PROBHD 5 mm PABBI 1H/  
PULPROG zgpg30  
TE 65536  
SOLVENT CDCl3  
NS 40  
DS 4  
SWH 24038.461 Hz  
FIDRES 0.366798 Hz  
AQ 1.3631988 sec  
RG 203  
DW 20.800 usec  
DE 6.50 usec  
TE 294.7 K  
D1 2.00000000 sec  
D11 0.03000000 sec  
TD0 1

===== CHANNEL f1 =====  
NUC1 13C  
P1 14.50 usec  
PL1 -4.00 dB  
PL1W 90.22689819 W  
SFO1 100.6228298 MHz

===== CHANNEL f2 =====  
CPDPRG2 waltz16  
NUC2 1H  
PCPD2 80.00 usec  
PL2 -2.00 dB  
PL12 18.80 dB  
PL13 18.80 dB  
PL2W 13.17734718 W  
PL12W 0.10960442 W  
PL13W 0.10960442 W  
SFO2 400.1316005 MHz  
SI 32768  
SF 100.6127531 MHz  
WDW EM  
SSB 0  
LB 1.00 Hz  
GB 0  
PC 1.40

152.61

107.35

77.48  
77.16  
76.84

65.03

36.01  
31.94  
29.25  
27.95  
25.70  
22.79

14.25  
10.42

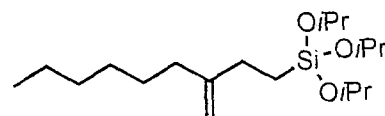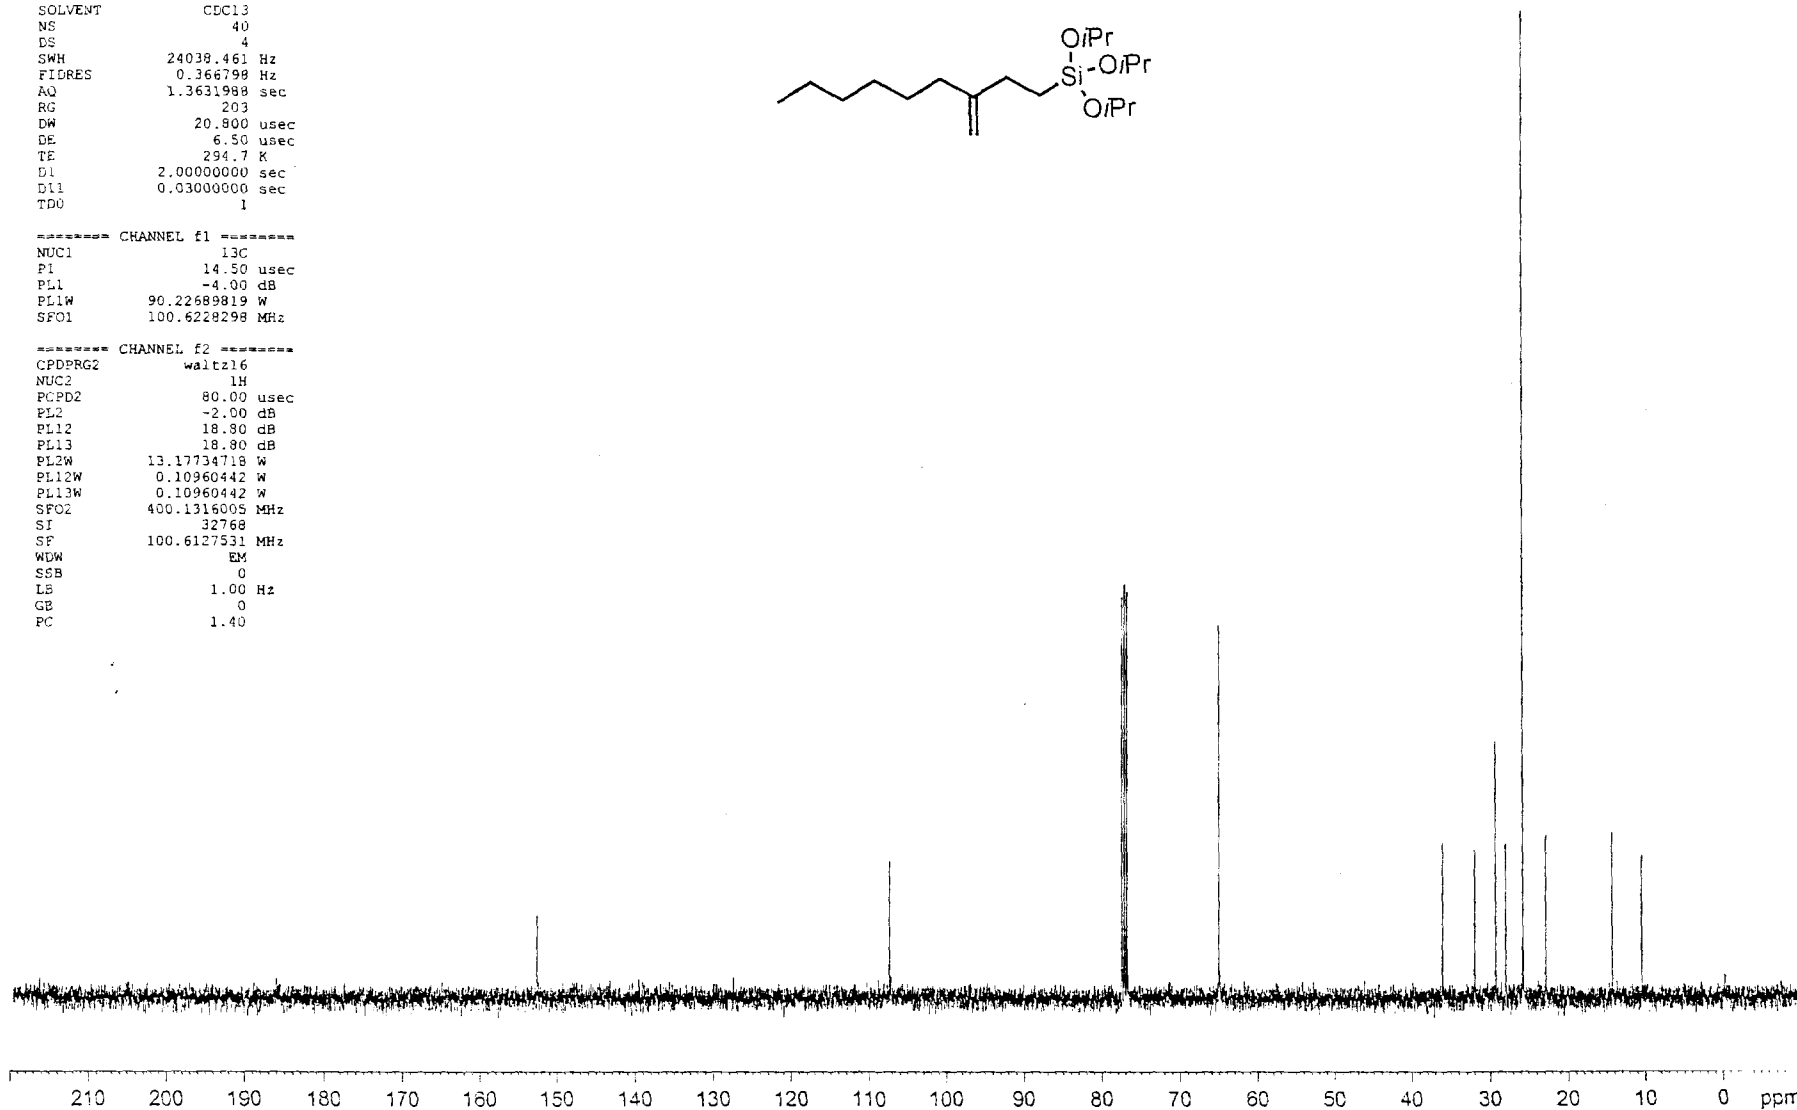

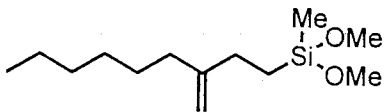

NAME his-2-7-5-c3233  
EXPNO 1  
PROCNO 1  
Date\_ 20100826  
Time 14.06  
INSTRUM spect  
PROBHD 5 mm PABBO BB-  
PULPROG zg30  
TD 65536  
SOLVENT CDCl3  
NS 11  
DS 2  
SWH 8223.685 Hz  
FIDRES 0.125483 Hz  
AQ 3.9846397 sec  
RG 71.8  
DW 60.800 usec  
DE 6.50 usec  
TE 300.7 K  
D1 1.00000000 sec  
TD0 1

===== CHANNEL f1 =====  
NUC1 1H  
P1 14.00 usec  
PL1 -1.00 dB  
PL1W 13.56617069 W  
SFO1 400.1924713 MHz  
SI 32768  
SF 400.1900132 MHz  
WDW EM  
SSB 0  
LB 0.30 Hz  
GB 0  
PC 1.00

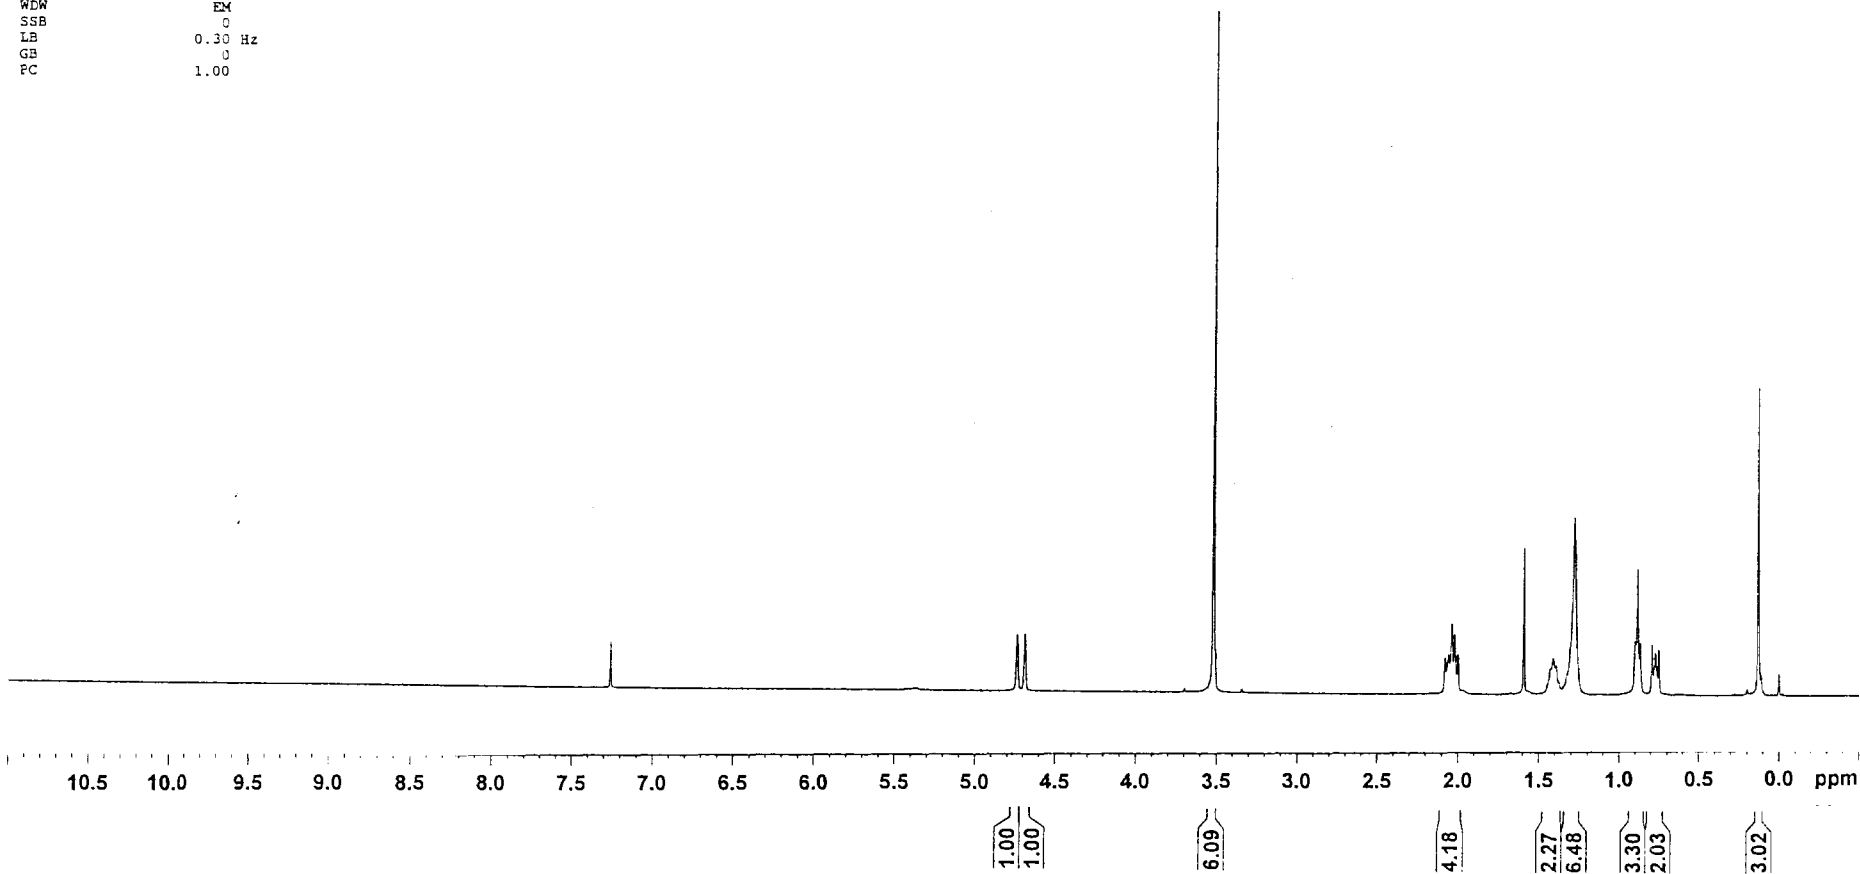

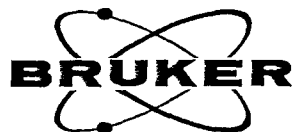

NAME hls-2-7-5-t3233  
EXPNO 2  
PROCNO 1  
Date\_ 20100826  
Time 14.13  
INSTRUM spect  
PROBHD 5 mm PABBO BB-  
PULPROG zgpg30  
TD 65536  
SOLVENT CDCl3  
NS 60  
DS 4  
SWH 24038.461 Hz  
FIDRES 0.366798 Hz  
AQ 1.3631988 sec  
RG 181  
DW 20.800 usec  
DE 6.50 usec  
TE 300.6 K  
D1 2.00000000 sec  
D11 0.03000000 sec  
TD0 1

----- CHANNEL f1 -----  
NUC1 13C  
P1 9.90 usec  
PL1 -2.00 dB  
PL1W 55.33689499 W  
SFO1 100.6379183 MHz

----- CHANNEL f2 -----  
CPDPRG2 waltz16  
NUC2 1H  
PCPD2 90.00 usec  
PL2 -1.00 dB  
PL12 15.16 dB  
PL13 18.62 dB  
PL2W 13.56617069 W  
PL12W 0.32844096 W  
PL13W 0.14806664 W  
SFO2 400.1916008 MHz  
S1 32768  
SF 100.6278412 MHz  
WDW EM  
SSB 0  
LB 1.00 Hz  
GB 0  
PC 1.40

152.13

107.68

77.48  
77.16  
76.85

50.34

36.04  
31.93  
29.29  
28.92  
27.98  
22.79

14.24  
11.39

5.67

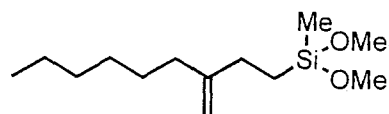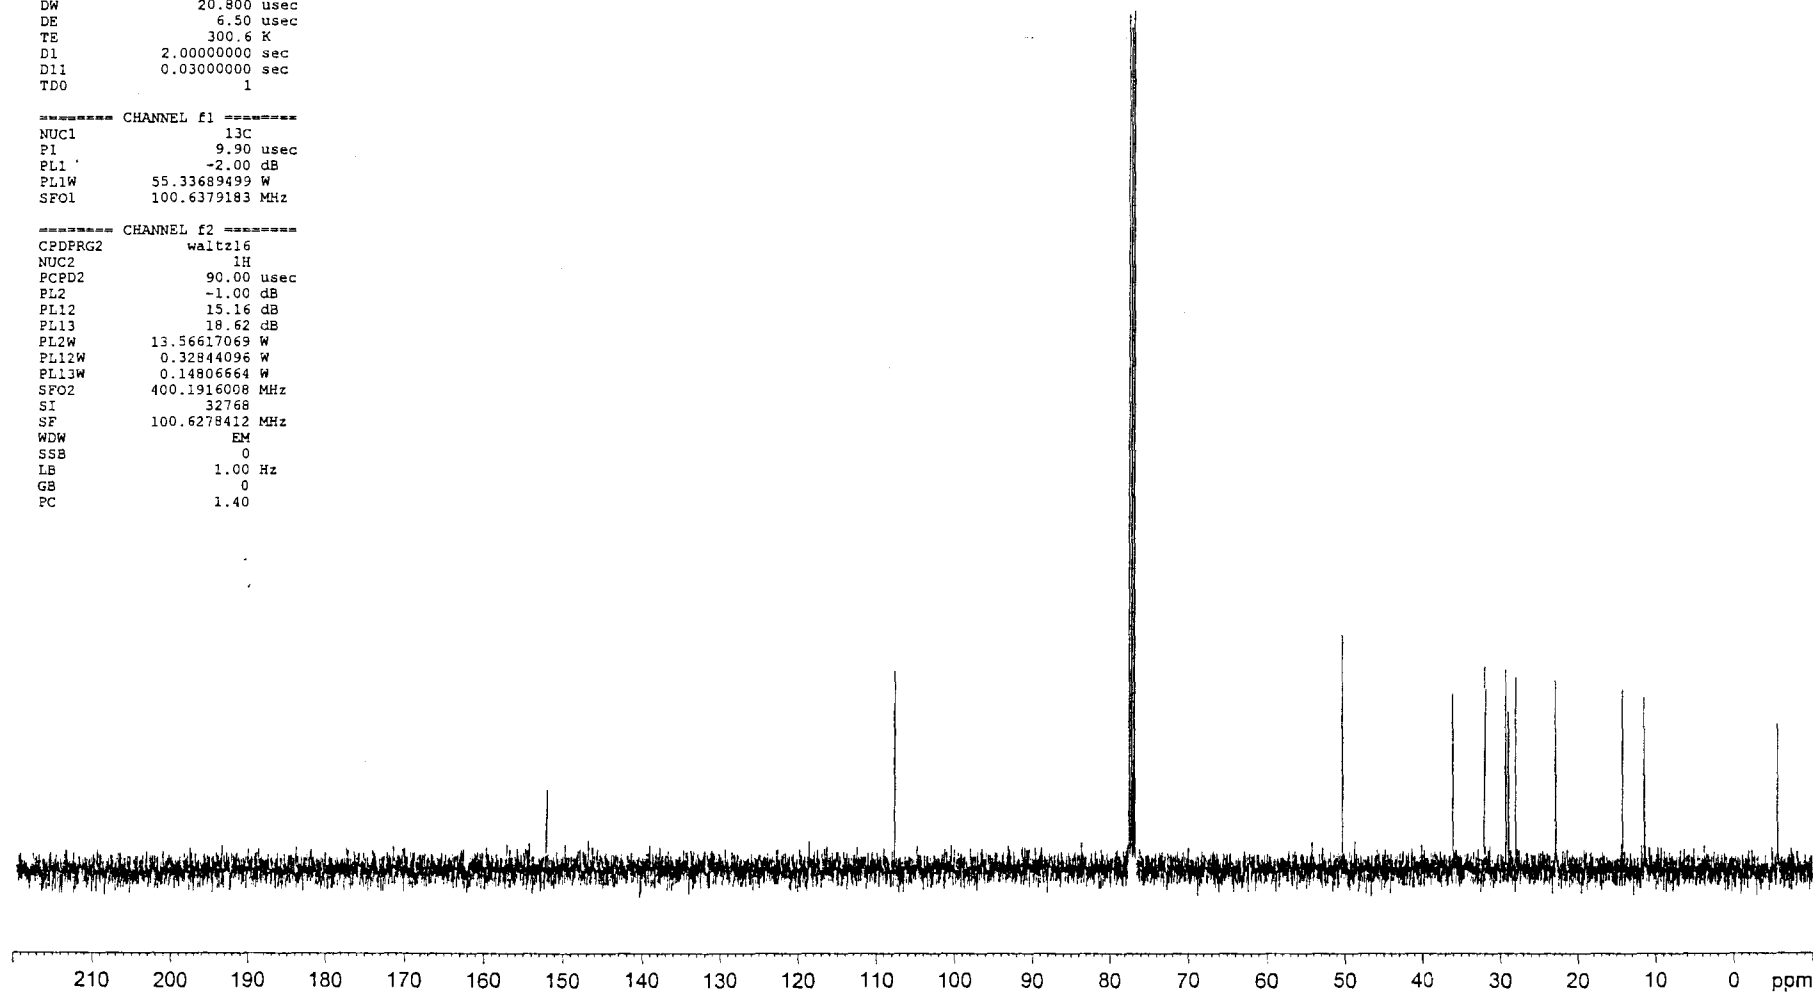

NAME his-2-11-4-t11  
EXNO 1  
PROCNO 1  
Date 20100831  
Time 21.33  
INSTRUM spect  
PROBHD 5 mm PABBI 1H/  
PULPROG zg30  
TD 65536  
SOLVENT CDCl3  
NS 3  
DS 0  
SWH 10000.000 Hz  
FIDRES 0.152588 Hz  
AQ 3.2768500 sec  
RG 36  
LW 50.000 usec  
DE 6.50 usec  
TE 294.4 K  
D1 5.0000000 sec  
TDO 1

\*\*\*\*\* CHANNEL f1 \*\*\*\*\*  
NUC1 1H  
P1 7.10 usec  
PL1 -2.00 dB  
PL1W 13.17734718 W  
SFO1 400.1316005 MHz  
SI 65536  
SF 400.1300053 MHz  
WDW EM  
SSB 0  
LB 0.30 Hz  
GB 0  
PC 1.00

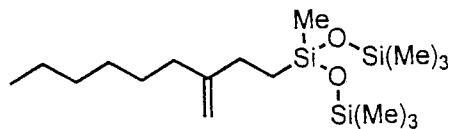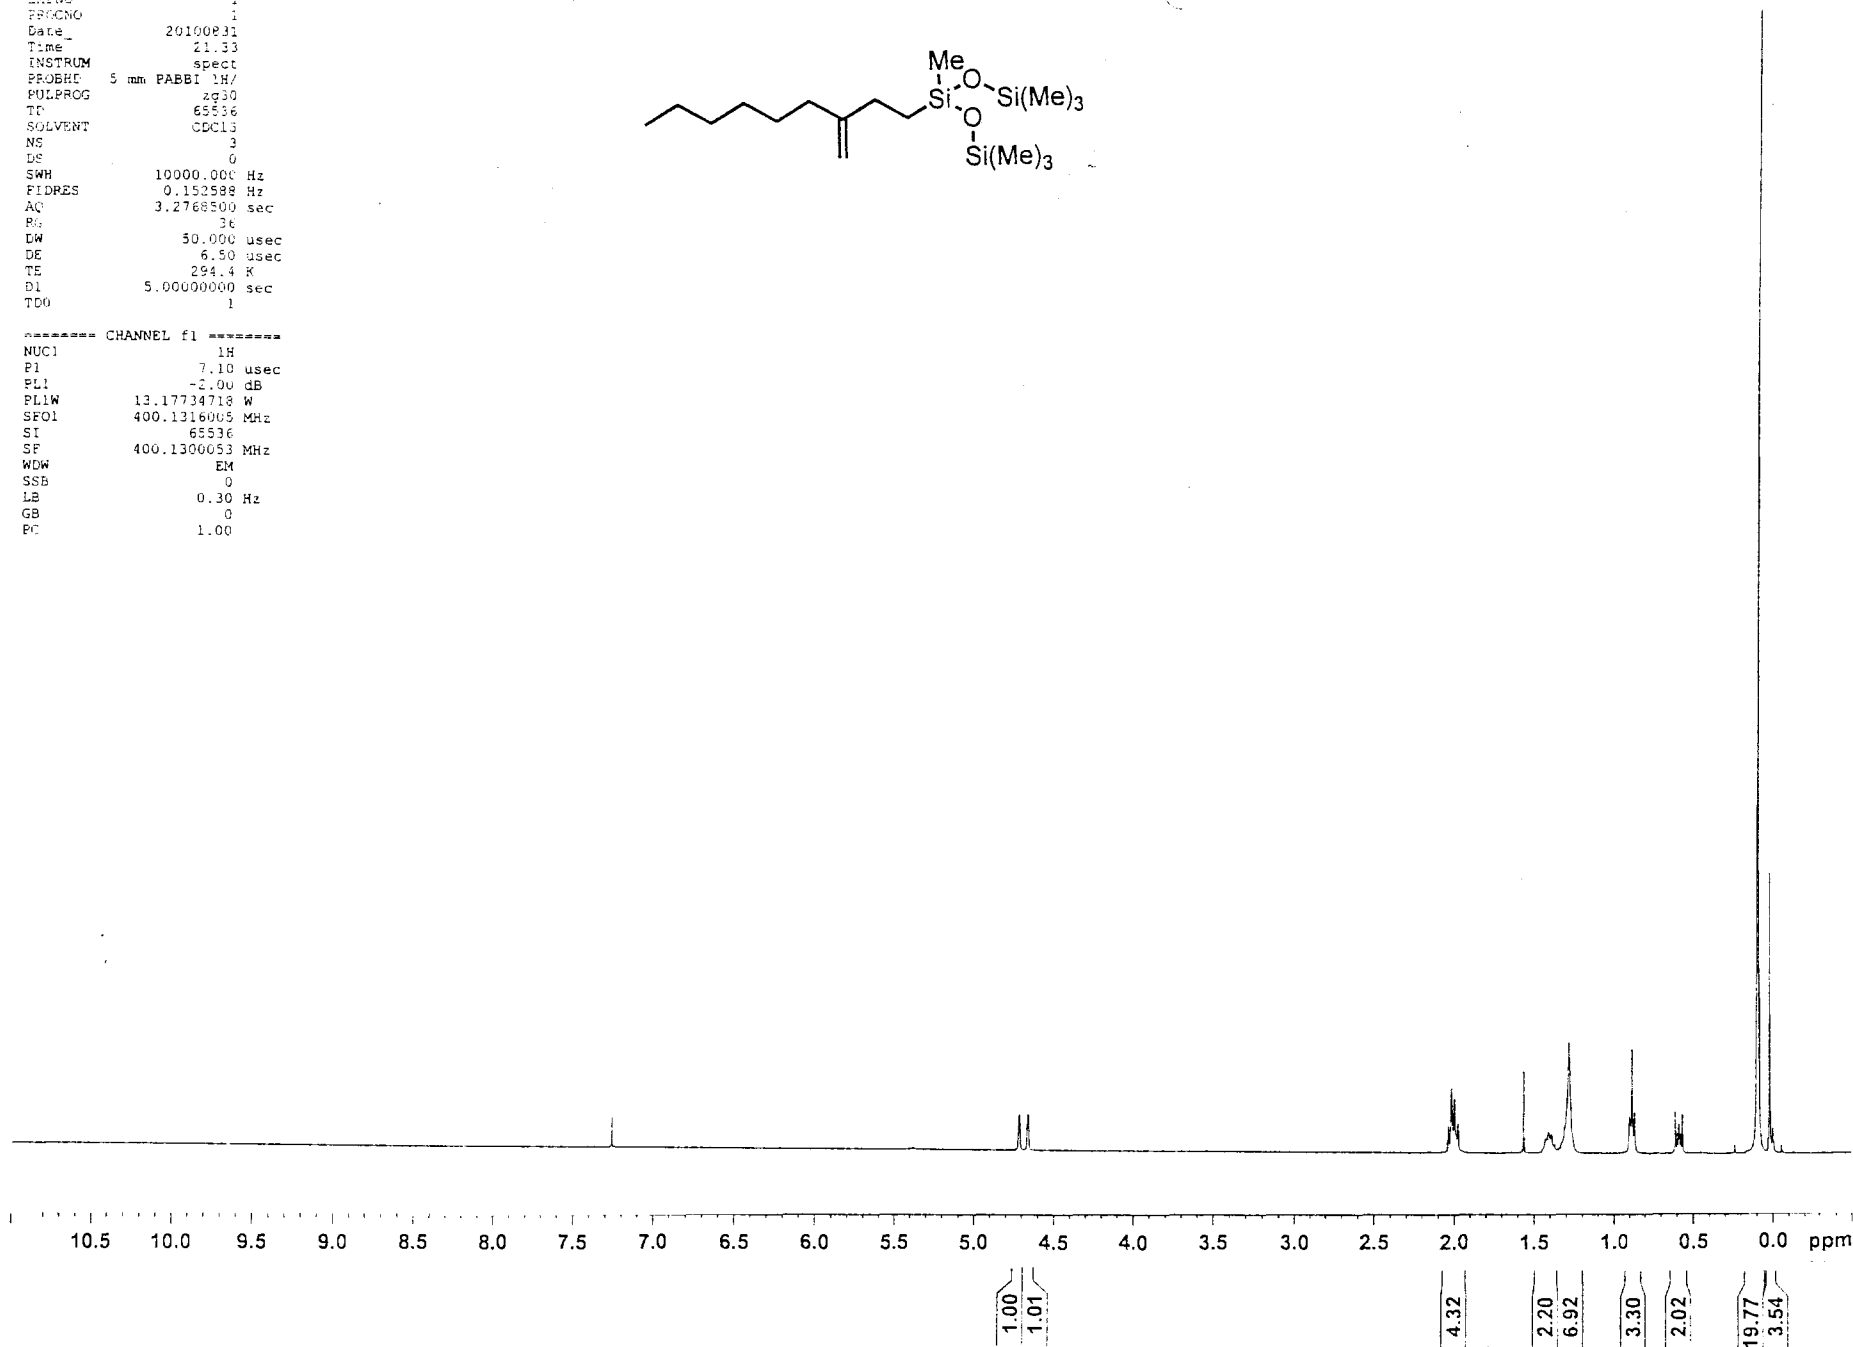

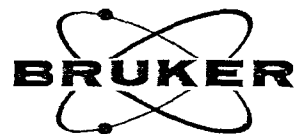

NAME hls-2-11-4-r11  
 EXPNO 2  
 PROCNO 1  
 Date\_ 20100831  
 Time\_ 21.39  
 INSTRUM spect  
 PROBHD 5 mm PABBI LH/  
 PULPROG zgpg30  
 TD 65536  
 SOLVENT CDCl3  
 NS 56  
 DS 4  
 SWH 24038.461 Hz  
 FIDRES 0.366798 Hz  
 AQ 1.3631988 sec  
 RG 203  
 DW 20.800 usec  
 DE 6.50 usec  
 TE 294.6 K  
 D1 2.00000000 sec  
 D11 0.03000000 sec  
 TD0 1

===== CHANNEL f1 =====  
 NUC1 13C  
 P1 14.50 usec  
 PL1 -4.00 dB  
 PL1W 90.22689819 W  
 SFO1 100.6228298 MHz

===== CHANNEL f2 =====  
 CPDPRG2 waltz16  
 NUC2 1H  
 PCPD2 80.00 usec  
 PL2 -2.00 dB  
 PL12 18.80 dB  
 PL13 18.80 dB  
 PL2W 13.17734718 W  
 PL12W 0.10960442 W  
 PL13W 0.10960442 W  
 SFO2 400.1316005 MHz  
 SI 32768  
 SF 100.6127531 MHz  
 WDW EM  
 SSB 0  
 LB 1.00 Hz  
 GE 0  
 PC 1.40

152.73

107.38

77.48  
 77.16  
 76.84

35.99  
 31.96  
 29.42  
 29.28  
 27.96  
 22.80  
 15.99  
 14.27

2.01  
 -0.21

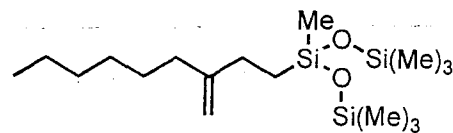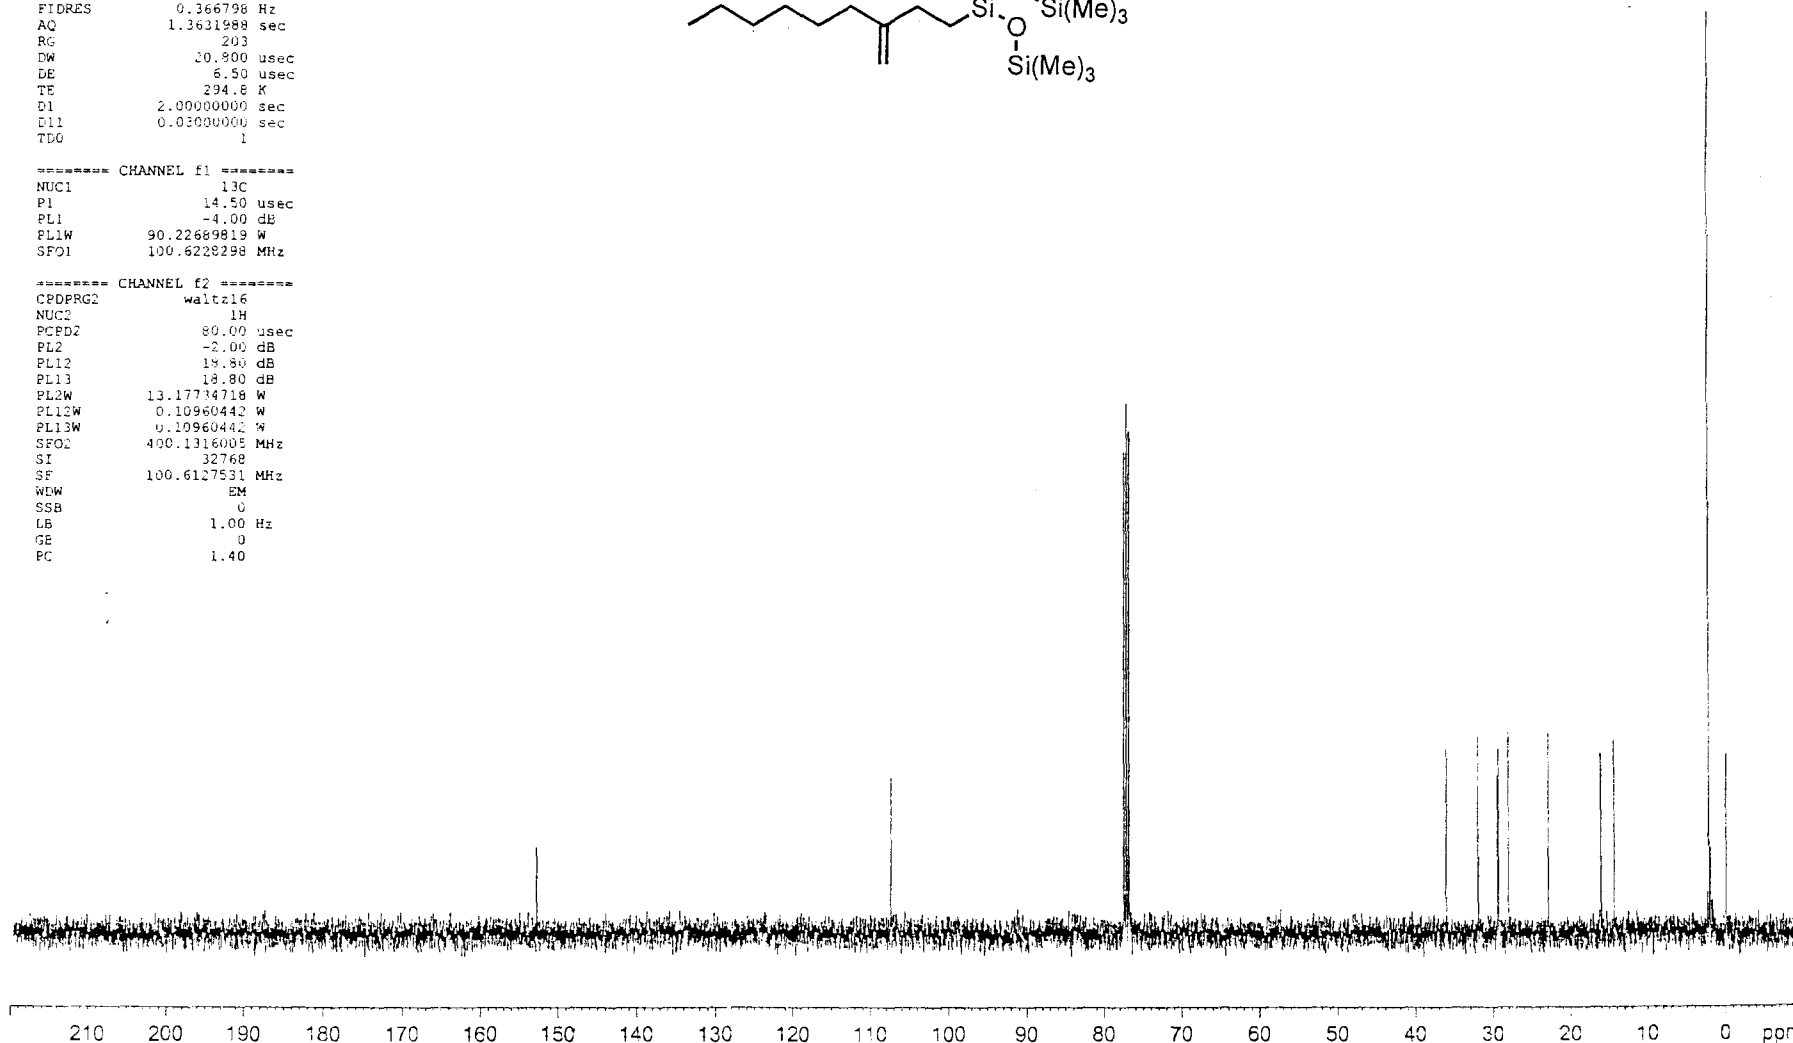



NAME hls-2-7-4-t19  
EXPNO 1  
PROCNO 1  
Date\_ 20100826  
Time 14.20  
INSTRUM spect  
PROBHD 5 mm PABBO BB-  
PULPROG zg30  
TD 65536  
SOLVENT CDCl3  
NS 6  
DS 2  
SWH 8223.685 Hz  
FIDRES 0.125483 Hz  
AQ 3.9846387 sec  
RG 45.2  
DW 60.800 usec  
DE 6.50 usec  
TE 300.1 K  
D1 1.00000000 sec  
TDO 1

===== CHANNEL f1 =====  
NUC1 1H  
P1 14.00 usec  
PL1 -1.00 dB  
PL1W 13.56617069 W  
SFO1 400.1924713 MHz  
SI 32768  
SF 400.1900133 MHz  
WDW EM  
SSB 0  
LB 0.30 Hz  
GB 0  
PC 1.00

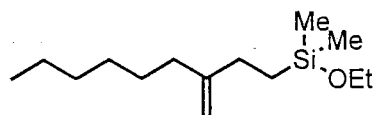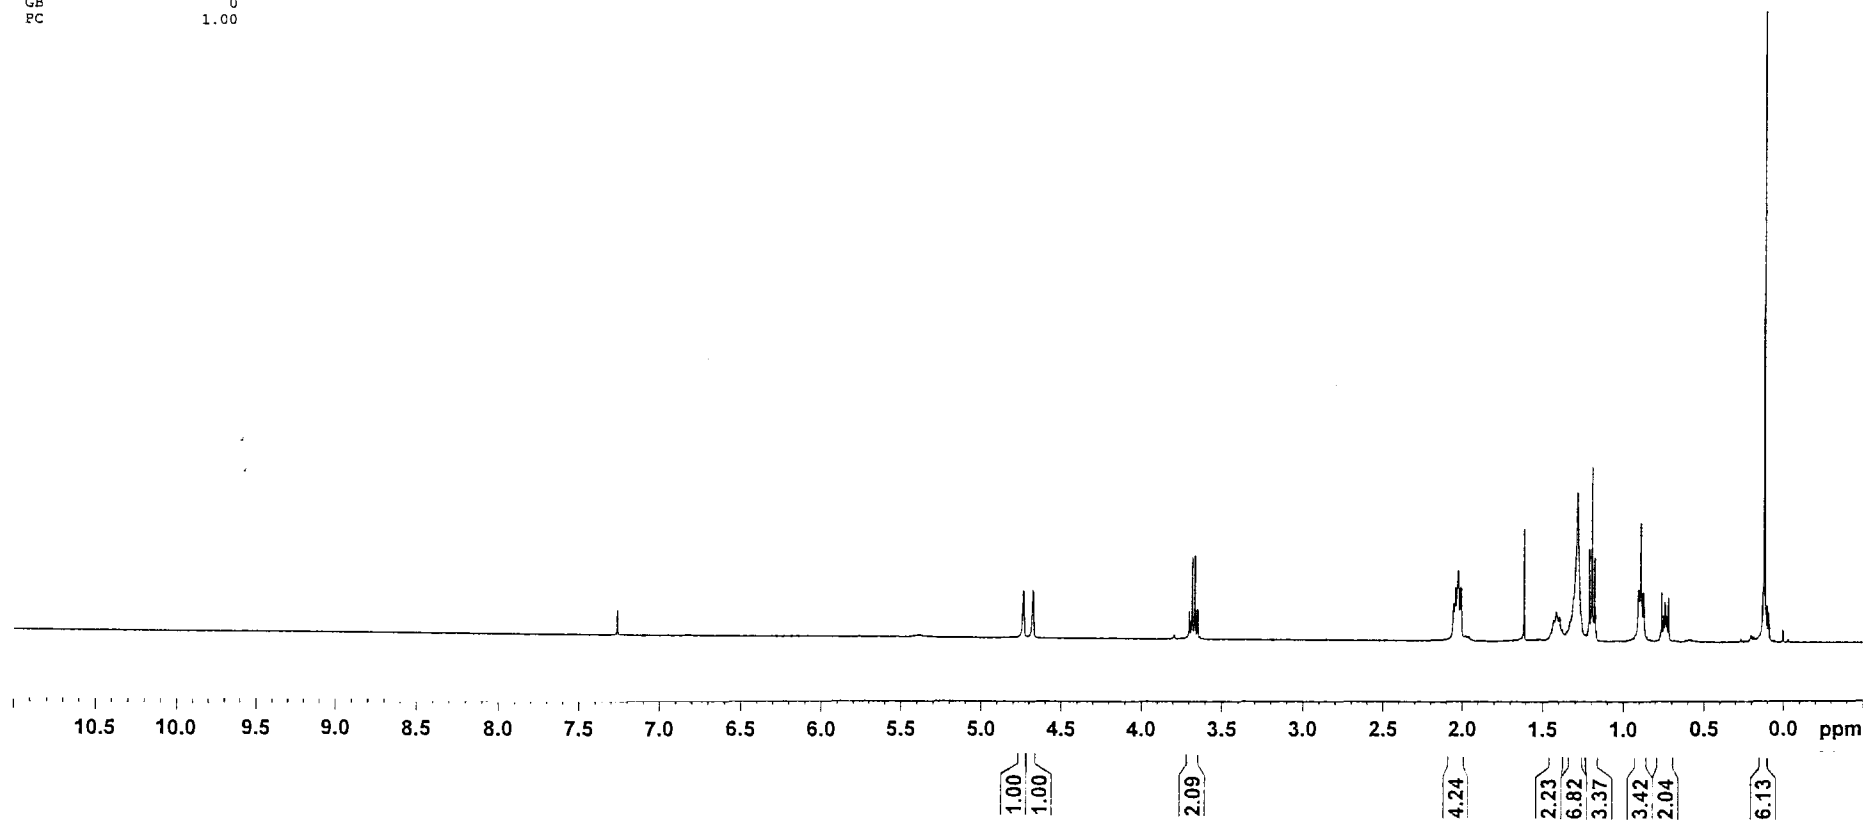

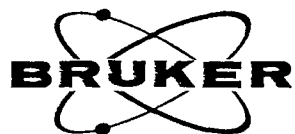

NAME hls-2-7-4-t19  
EXNO 2  
PROCNO 1  
Date 20100826  
Time 14.26  
INSTRUM spect  
PROBHD 5 mm PABBO BB-  
PULPROG zgpg30  
TD 65536  
SOLVENT CDCl3  
NS 87  
DS 4  
SWH 24038.461 Hz  
FIDRES 0.366798 Hz  
AQ 1.3631988 sec  
RG 181  
CW 20.800 usec  
DE 6.50 usec  
TE 300.4 K  
D1 2.00000000 sec  
D11 0.03000000 sec  
TD0 1

----- CHANNEL f1 -----  
NUC1 13C  
P1 9.90 usec  
PL1 -2.00 dB  
PL1W 55.33689499 W  
SFO1 100.6379183 MHz

----- CHANNEL f2 -----  
CPDPRG2 waltz16  
NUC2 1H  
PCPD2 90.00 usec  
PL2 -1.00 dB  
PL12 15.16 dB  
PL13 18.62 dB  
PL2W 13.56617069 W  
PL12W 0.32844096 W  
PL13W 0.14806664 W  
SFO2 400.1916008 MHz  
SI 32768  
SF 100.6278416 MHz  
WDW EM  
SSB 0  
LB 1.00 Hz  
GB 0  
PC 1.40

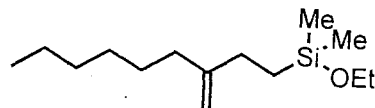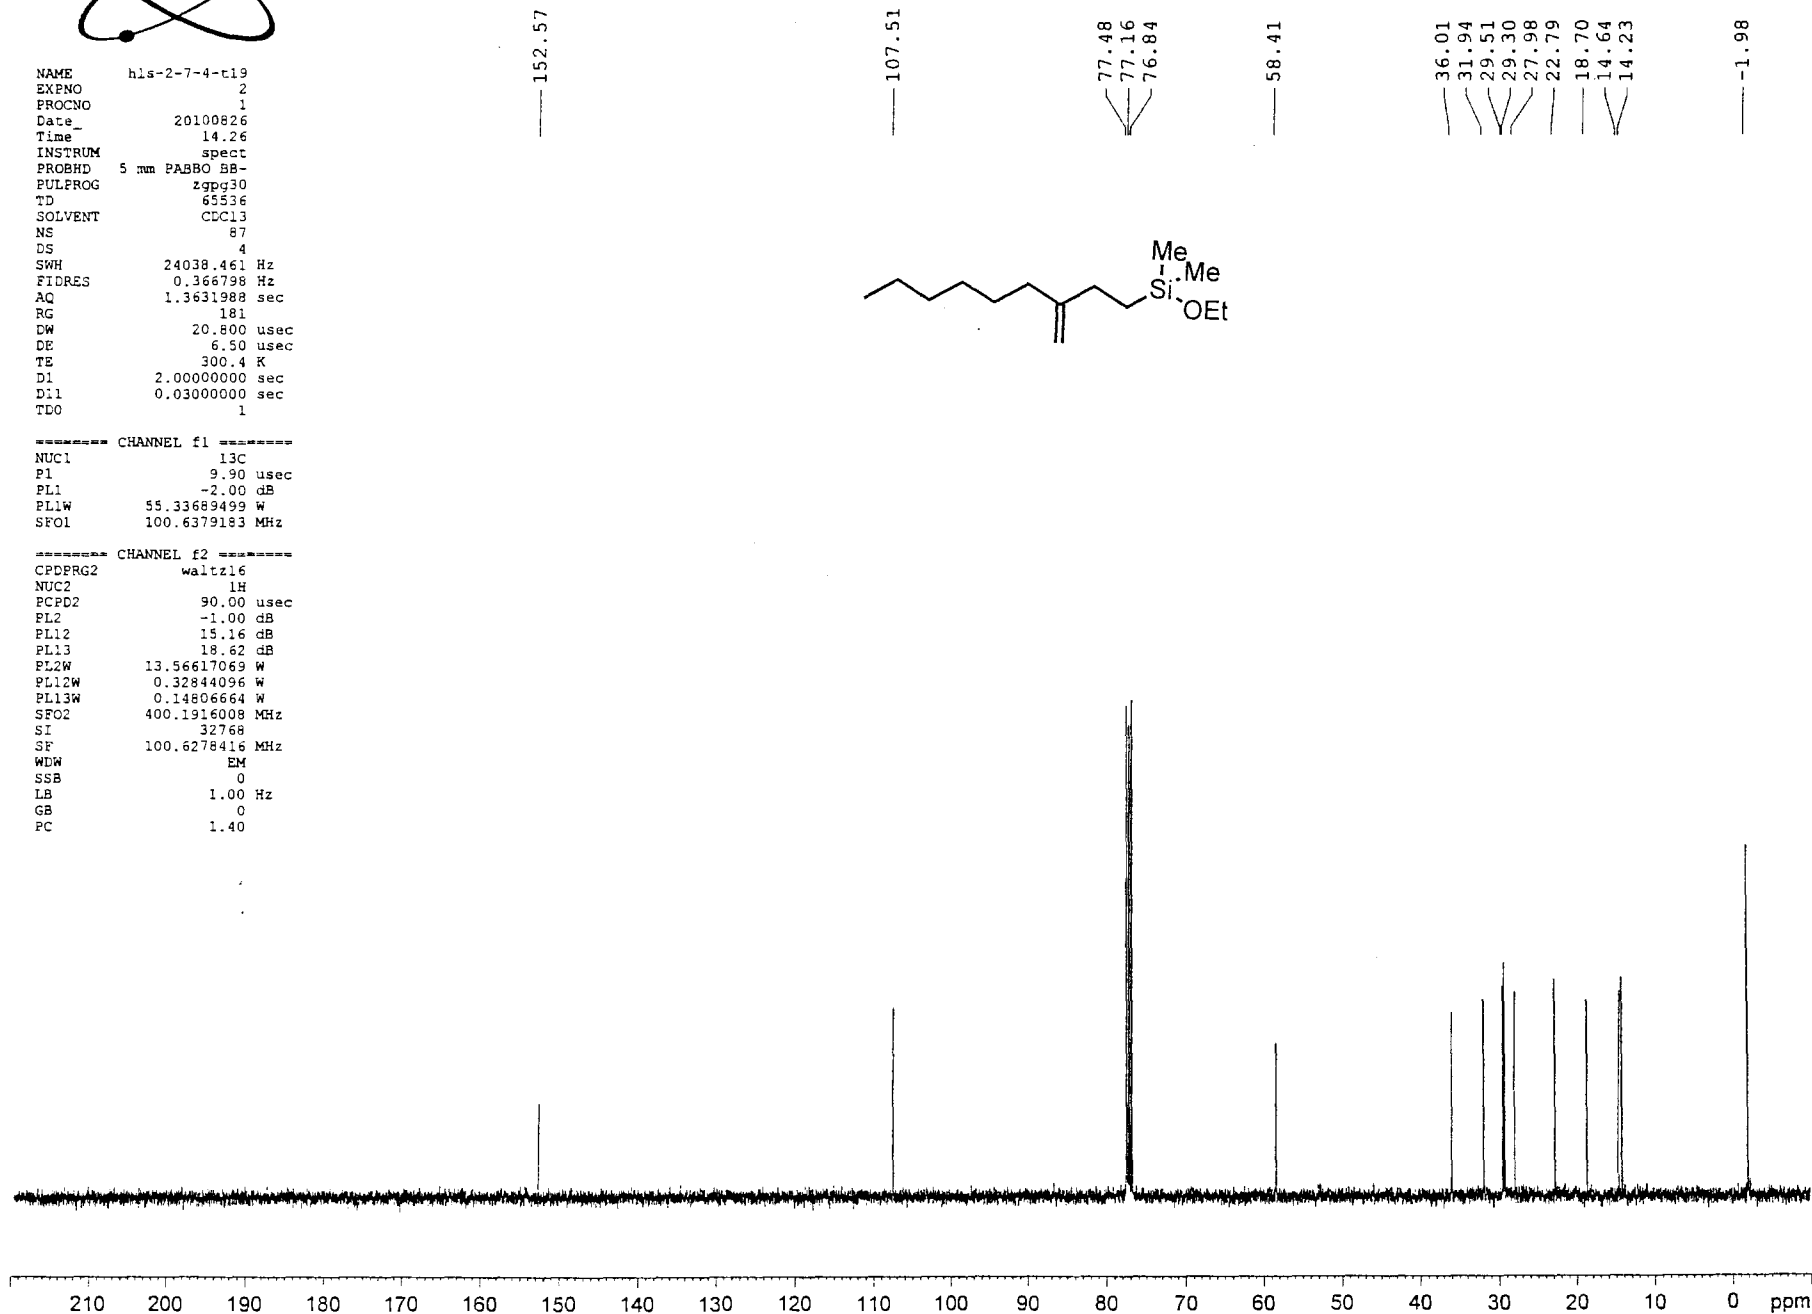

NAME his-1-249-2-t16  
EXPNO 1  
PROCNO 1  
Date\_ 20100914  
Time 18.19  
INSTRUM spect  
PROBHD 5 mm PABBI 1H/  
PULPROG zg30  
TD 65536  
SOLVENT CDCl3  
NS 6  
DS 0  
SWH 10000.000 Hz  
FIDRES 0.152588 Hz  
AQ 3.2768500 sec  
RG 64  
DW 50.000 usec  
DE 6.50 usec  
TE 296.0 K  
D1 5.00000000 sec  
TDG 1

===== CHANNEL f1 =====  
NUC1 1H  
P1 7.10 usec  
PL1 -2.00 dB  
PL1W 13.17734718 W  
SFO1 400.1316005 MHz  
SI 65536  
SF 400.1300050 MHz  
WDW EM  
SSB 0  
LB 0.30 Hz  
GB 0  
PC 1.00

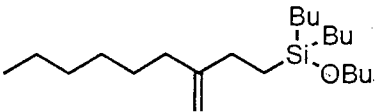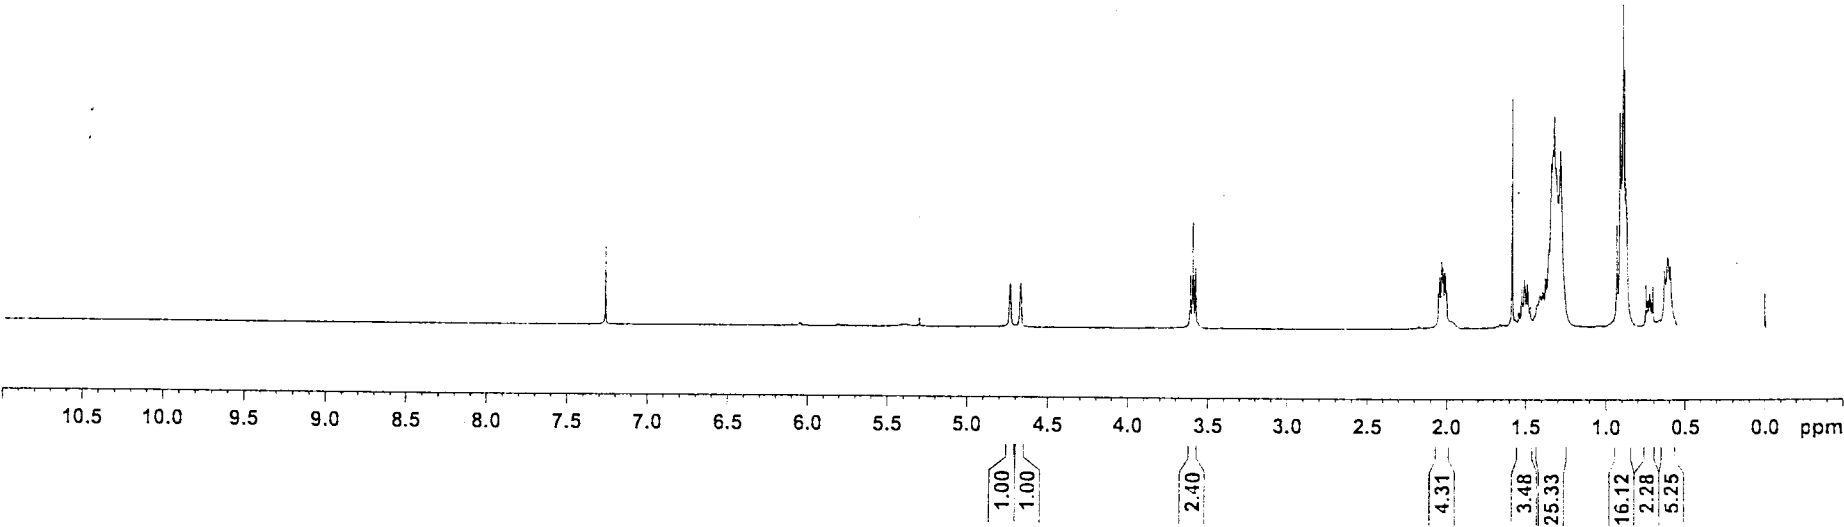

```

===== CHANNEL f2 =====
CPDPRG2          wait216
NUC2              1H
PCPD2            80.00 usec
PL2              -2.00 dB
PL1C             18.80 dB
PL13             18.80 dB
PL2W             13.17734718 W
PL12W            0.10960442 W
PL13W            0.10960442 W
SFO2             400.1316005 MHz
SI               32768
SF               100.6127531 MHz
WDW              EM
SSB              0
LB               1.00 Hz
GB               0
PC               1.40

```

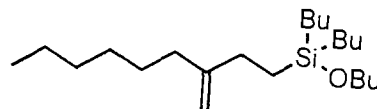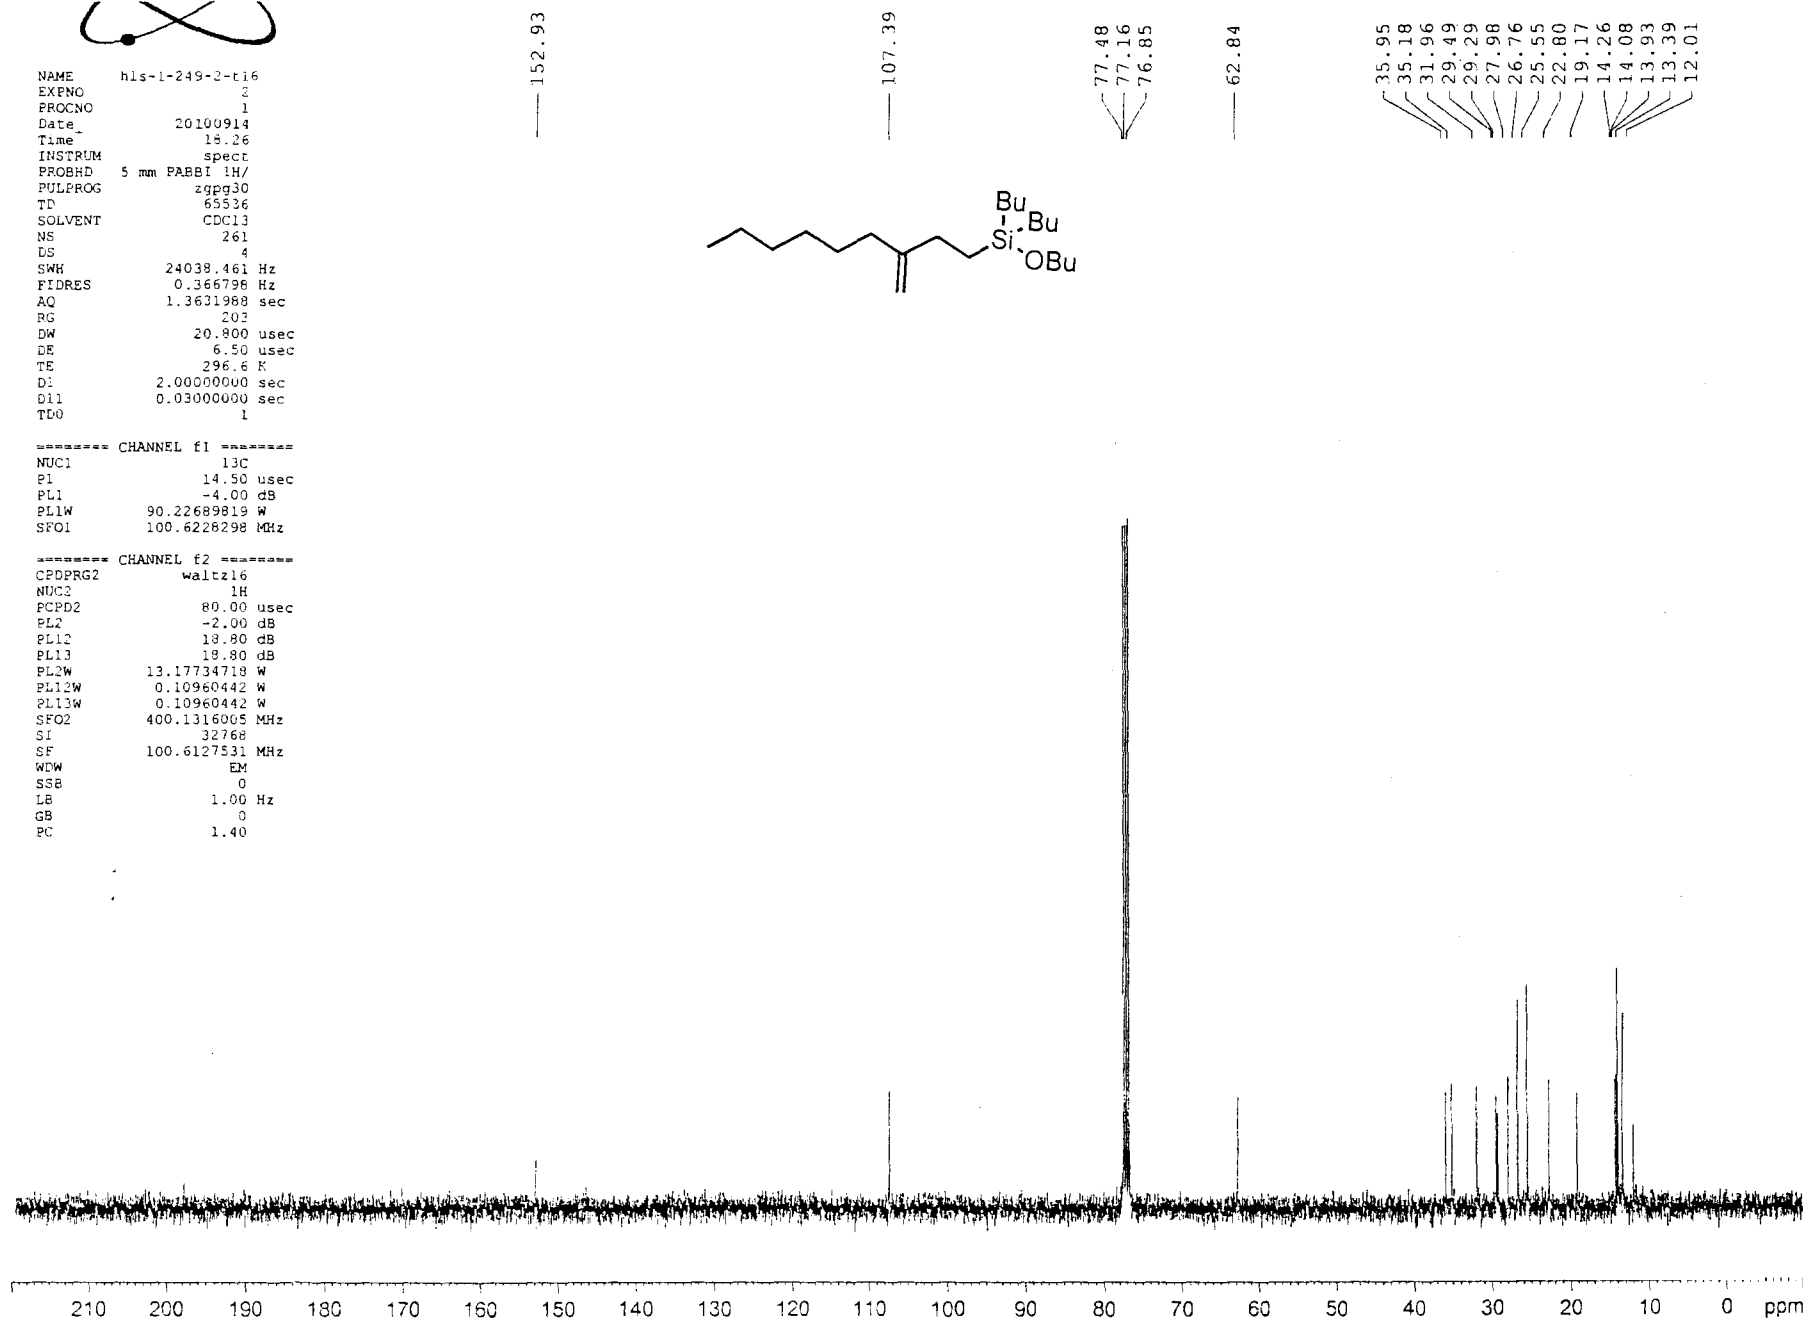

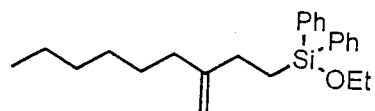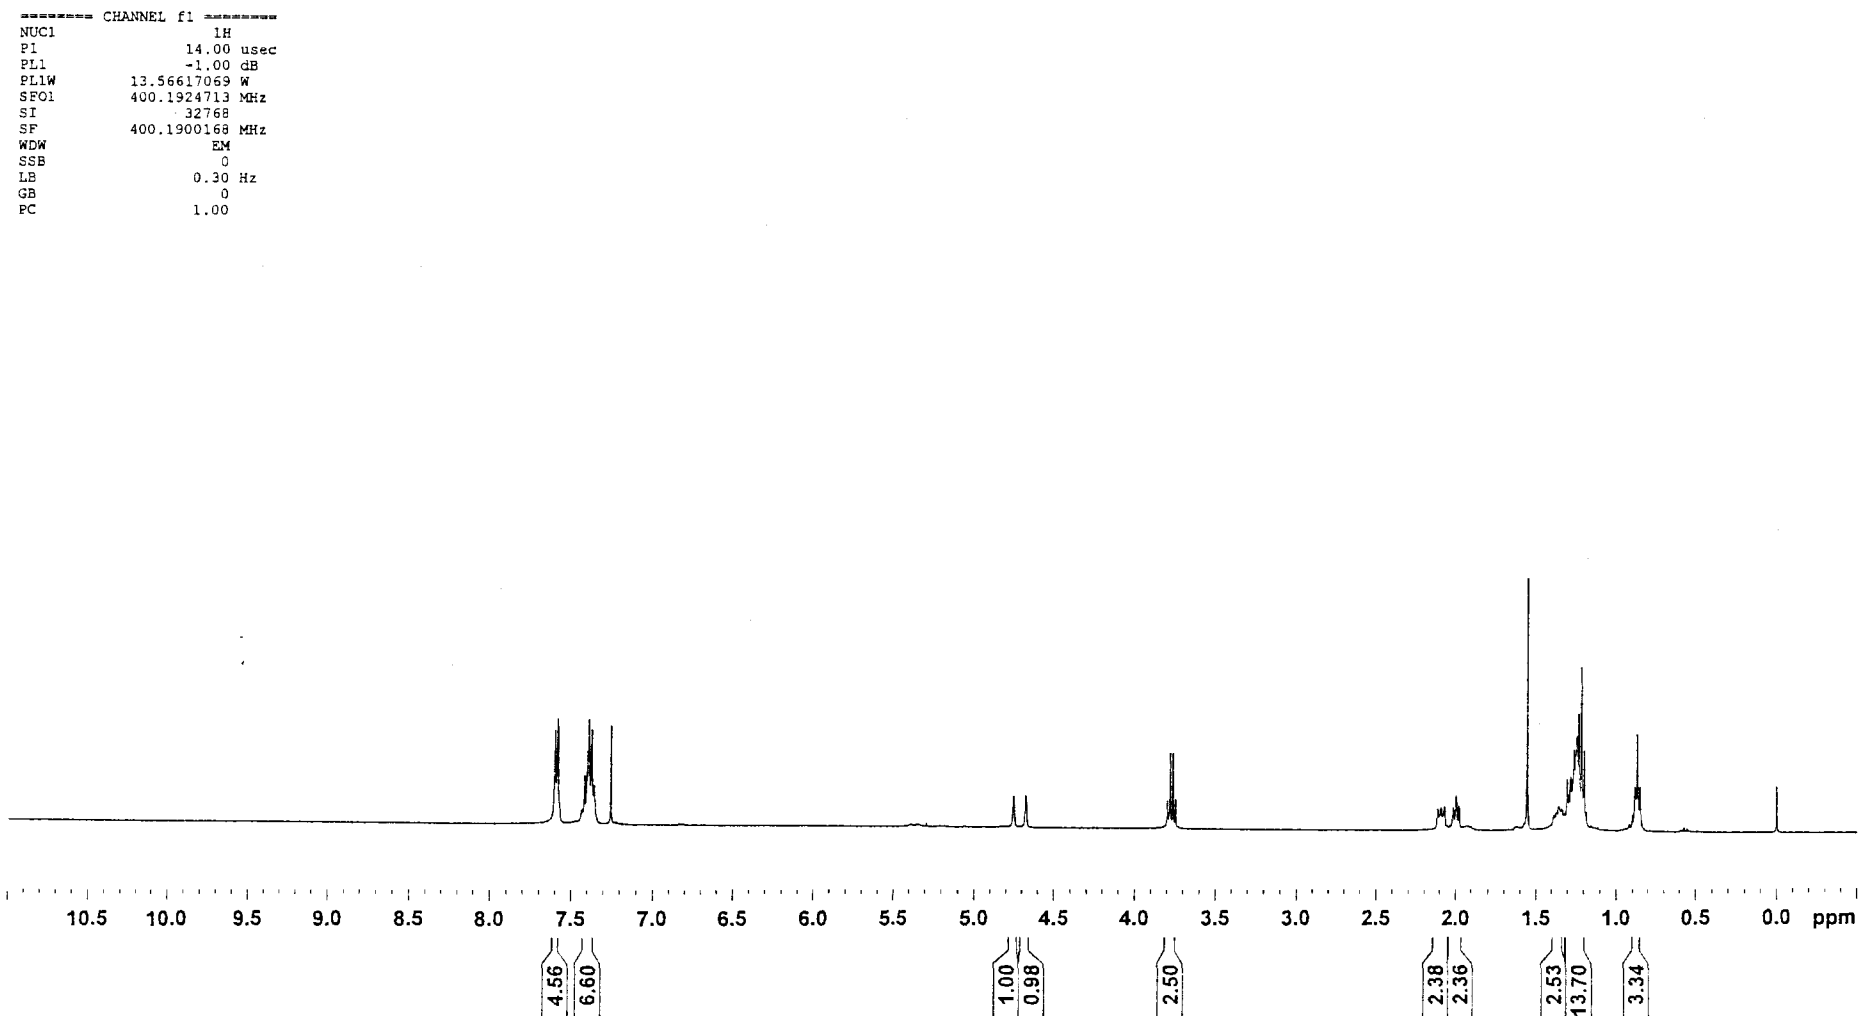

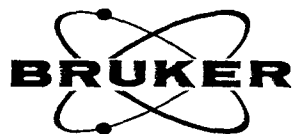

NAME hls-2-20-1-t20  
EXPNO 2  
PROCNO 1  
Date\_ 20100926  
Time 15.44  
INSTRUM spect  
PROBHD 5 mm PABBO BB-  
PULPROG zgpg30  
TD 65536  
SOLVENT CDCl3  
NS 163  
DS 4  
SWH 24038.461 Hz  
FIDRES 0.366798 Hz  
AQ 1.3631988 sec  
RG 181  
DW 20.800 usec  
DE 6.50 usec  
TE 298.8 K  
D1 2.00000000 sec  
D11 0.03000000 sec  
TD0 1

----- CHANNEL f1 -----  
NUC1 13C  
P1 9.90 usec  
PL1 -2.00 dB  
PL1W 55.33689499 W  
SFO1 100.6379183 MHz

----- CHANNEL f2 -----  
CPDPRG2 waltz16  
NUC2 1H  
PCPD2 90.00 usec  
PL2 -1.00 dB  
PL12 15.16 dB  
PL13 18.62 dB  
PL2W 13.56617069 W  
PL12W 0.32844096 W  
PL13W 0.14806664 W  
SFO2 400.1916008 MHz  
SI 32768  
SF 100.6278427 MHz  
WDW EM  
SSB 0  
LB 1.00 Hz  
GB 0  
PC 1.40

152.45

135.24  
134.81  
129.94  
127.99  
127.93

107.56

77.48  
77.16  
76.84

59.45

36.00  
31.90  
29.26  
29.24  
27.89  
22.76  
18.56  
14.24  
12.27

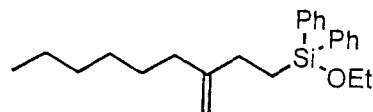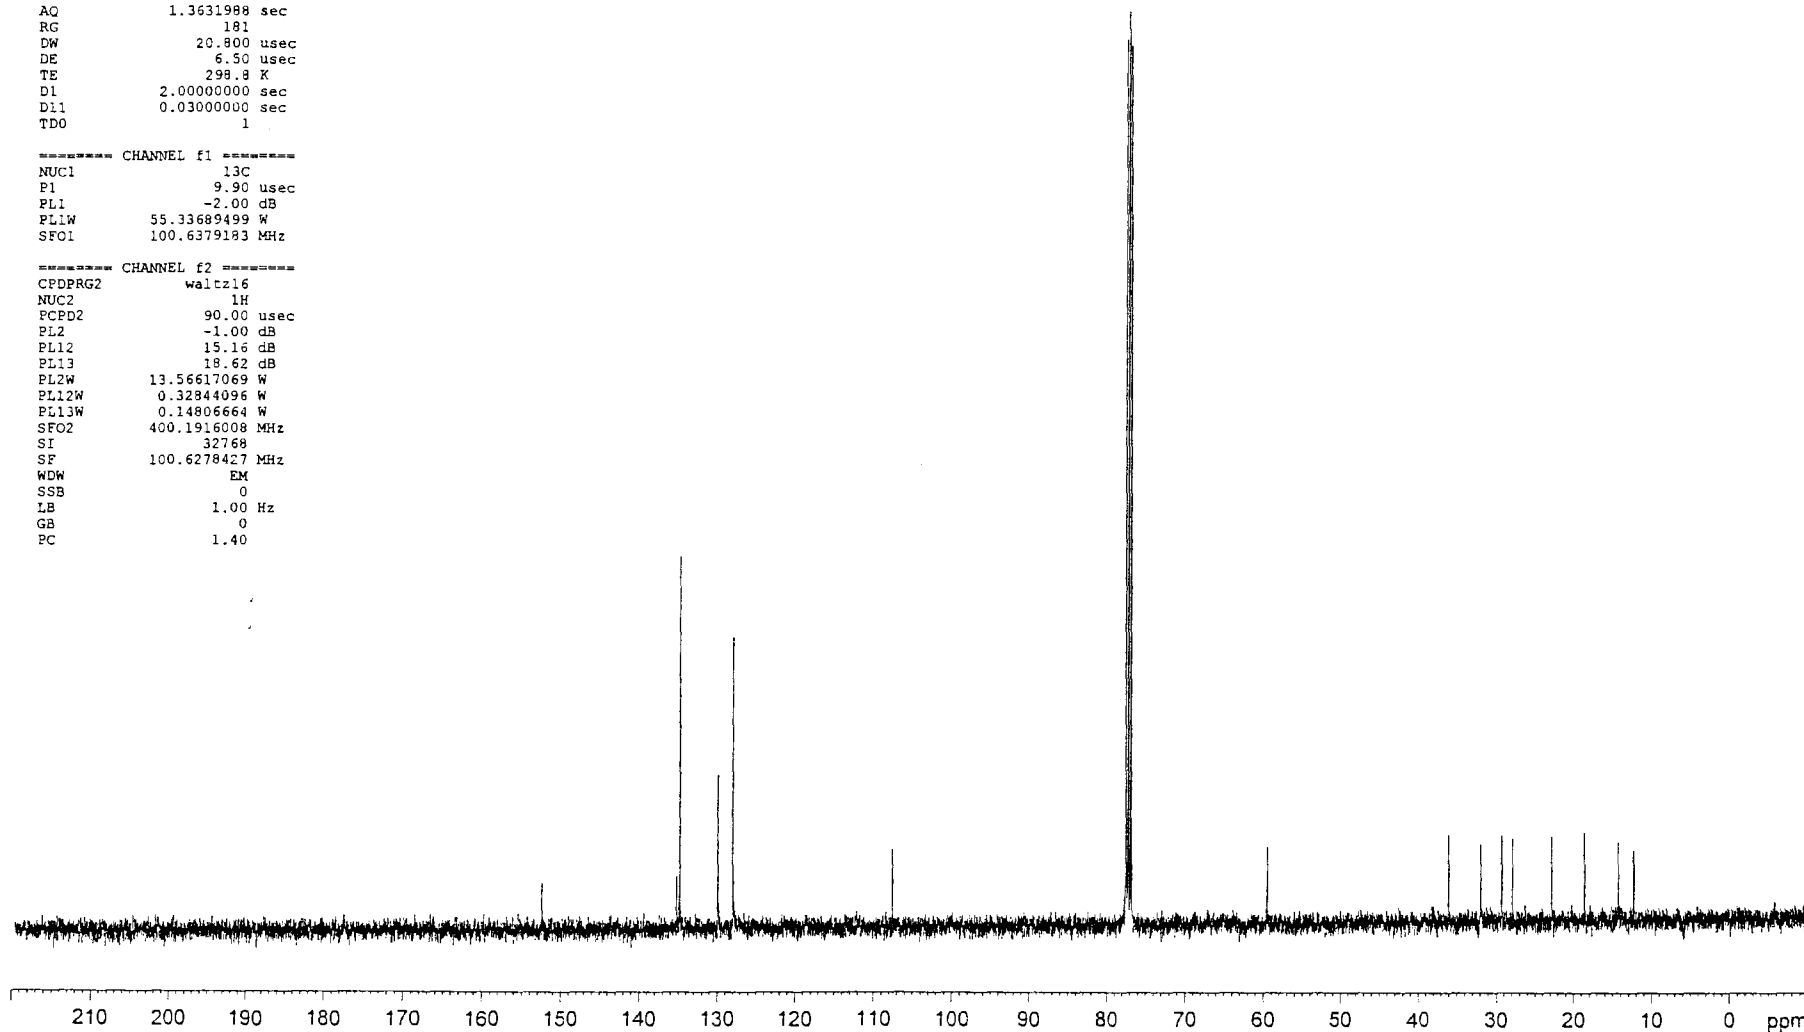

```

NAME      119-5224-1
EXPNO     1
PROCNO     1
Date_      20101006
Time       21.54
INSTRUM    spect
PROBHD     5 mm PABBO BB-
PULPROG    zg30
TD         65536
SOLVENT     CDCl3
NS         5
DS         1
SWH        8223.685 Hz
FIDRES     0.125483 Hz
AQ         3.9846387 sec
RG         40.3
DW         60.800 usec
DE         6.50 usec
TE         297.9 K
D1         5.00000000 sec
TD0        1

```

```

===== CHANNEL f1 =====
NUC1       1H
P1         14.00 usec
PL1        -1.00 dB
PL1W       13.56617069 W
SFO1       400.1924713 MHz
SI         32768
SF         400.1900156 MHz
WDW        EM
SSB        0
LB         0.30 Hz
GB         0
PC         1.00

```

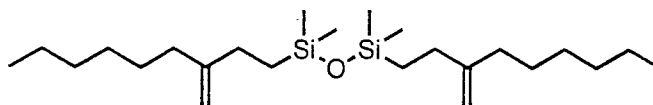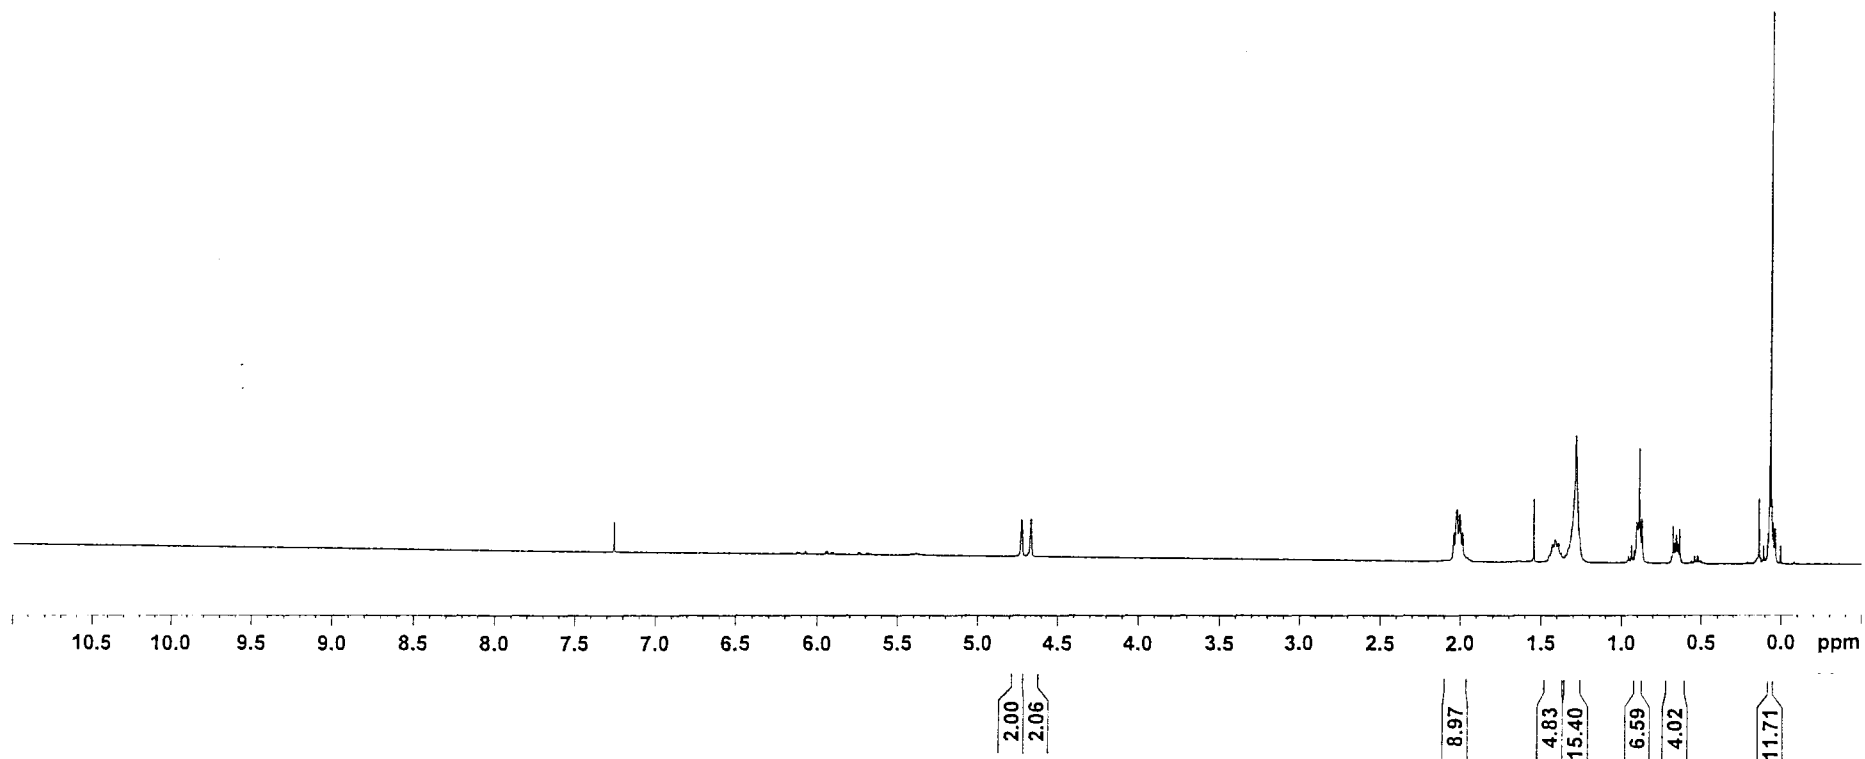

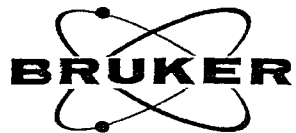

```
NAME      his-2-21-2-t8
EXPNO     2
PROCNO    1
Date_     20101008
Time      15.24
INSTRUM    spect
PROBHD     5 mm PABBI 1H/
PULPROG    zgpg30
TD         65536
SOLVENT    CDCl3
NS         802
DS         4
SWH        24039.461 Hz
FIDRES     0.366798 Hz
AQ         1.3631988 sec
RG         203
DW         20.800 usec
DE         6.50 usec
TE         294.7 K
D1         2.00000000 sec
D11        0.03000000 sec
TD0        1
```

```
===== CHANNEL f1 =====
NUC1       13C
P1         14.50 usec
PL1        -4.00 dB
PL1W       90.22689819 W
SFO1       100.6228298 MHz
```

```
===== CHANNEL f2 =====
CPDPRG2    waltz16
NUC2       1H
PCPD2      80.00 usec
PL2        -2.00 dB
PL12       18.80 dB
PL13       18.80 dB
PL2W       13.17734718 W
PL12W      0.10960442 W
PL13W      0.10960442 W
SFO2       400.1316005 MHz
SI         32768
SF         100.6127538 MHz
WDW        EM
SSB        0
LB         1.00 Hz
GB         0
PC         1.40
```

152.76

107.40

77.48  
77.16  
76.84

36.00  
31.96  
29.64  
29.31  
27.97  
22.81  
16.64  
14.26

0.45

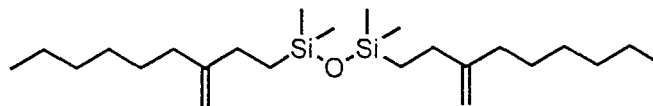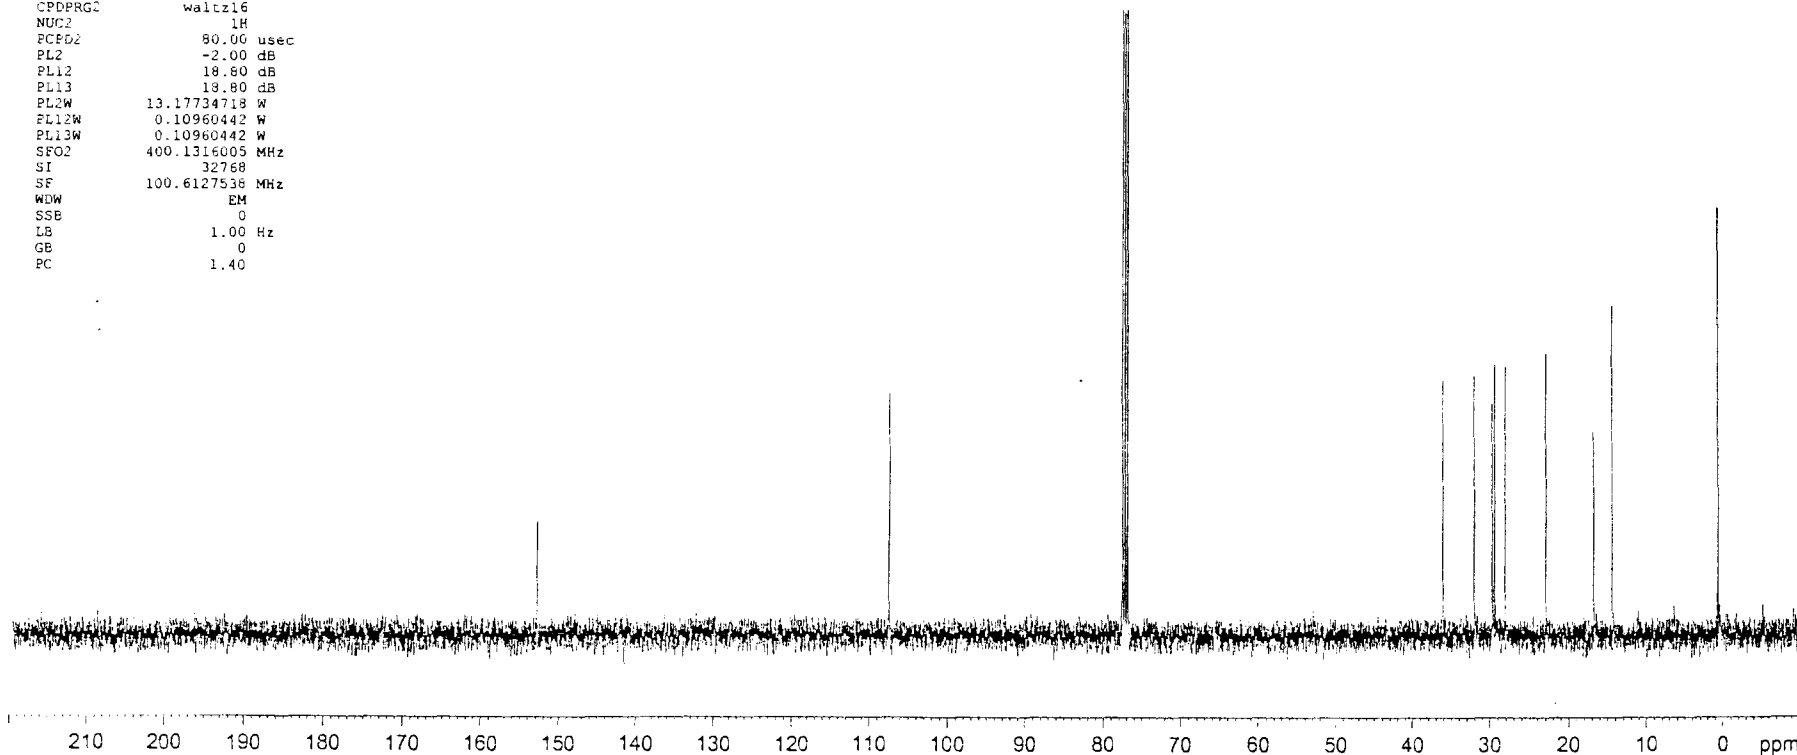



NAME nis-2-26-3-113c  
EXNO 1  
PROCNO 1  
Date 20101016  
Time 11.12  
INSTRUM spect  
PROBHD 5 mm EASY 13C  
PULPROG zgpg30  
TD 65536  
SOLVENT CDCl3  
NS 6  
DS 0  
SWH 10000.000 Hz  
FIDRES 0.157588 Hz  
AQ 3.2788500 sec  
RG 203  
DE 50.000 usec  
TE 6.50 usec  
TE 294.5 K  
D1 5.00000000 sec  
TD0 1

===== CHANNEL f1 =====  
NUC1 1H  
P1 14.83 usec  
PL1 0.00 dB  
PL1W 6.31434441 W  
SFO1 400.1316005 MHz  
SI 65536  
SF 400.1300088 MHz  
WDW EM  
SSB 0  
LB 0.30 Hz  
GB 0  
PC 1.00

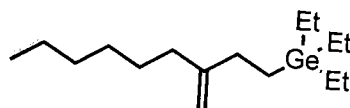

Ø 1-octene dimers

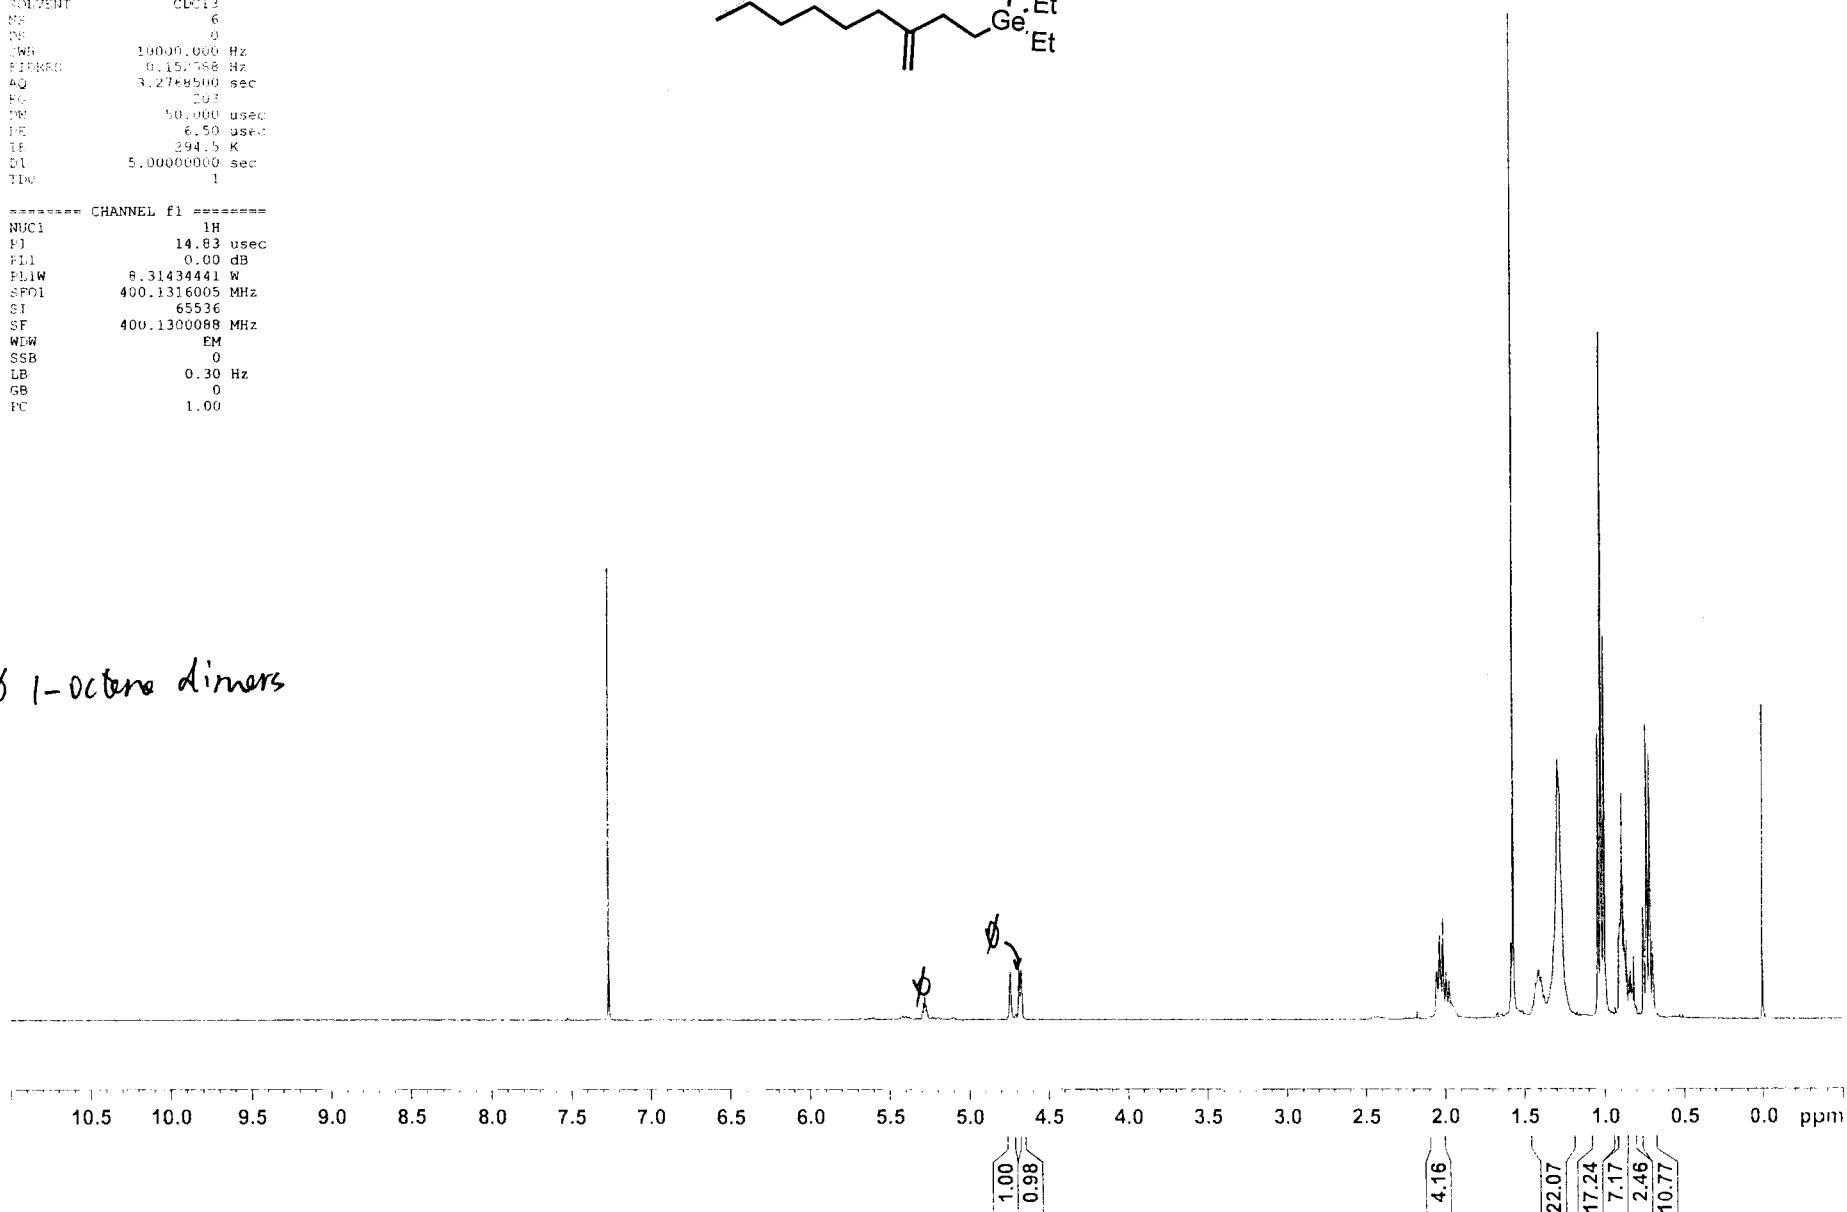

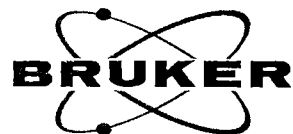

NAME hls-2-26-3-t13c  
EXFNO 2  
PROCNO 1  
Date\_ 20101016  
Time 11.18  
INSTRUM spect  
PROBHD 5 mm PADUL 13C  
PULPROG zgpg30  
TD 65536  
SOLVENT CDCl3  
NS 3871  
DS 4  
SWH 24038.461 Hz  
FIDRES 0.366798 Hz  
AQ 1.3631988 sec  
RG 203  
LW 20.800 usec  
DE 6.50 usec  
TE 294.9 K  
D1 2.00000000 sec  
D11 0.03000000 sec  
TD0 1

===== CHANNEL f1 =====  
NUC1 13C  
P1 9.68 usec  
PL1 -0.60 dB  
PL1W 41.24164963 W  
SFO1 100.6228298 MHz

===== CHANNEL f2 =====  
CPDPRG2 waltz16  
NUC2 1H  
PCPD2 90.00 usec  
PL2 0.00 dB  
PL12 15.66 dB  
PL13 15.92 dB  
PL1W 8.31434441 W  
PL12W 0.22585411 W  
PL13W 0.21272963 W  
SFO2 400.1316005 MHz  
SI 32768  
SF 100.6127546 MHz  
WDW EM  
SSB 0  
LB 1.00 Hz  
GB 0  
PC 1.40

153.23

107.40

77.48  
77.16  
76.84

35.91  
31.95  
31.53  
29.31  
27.97  
22.80

14.26  
9.84  
9.13  
3.97

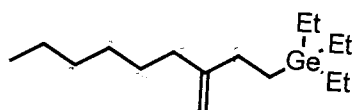

1-octene dimers

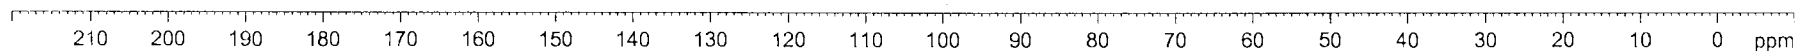

NAME hls-2-7-1 t9  
EXPNO 11  
PROCNO 1  
Date\_ 20101018  
Time 16.05  
INSTRUM spect  
PROBHD 5 mm PABBO BB-  
PULPROG zg30  
TD 65536  
SOLVENT CDCl3  
NS 3  
DS 2  
SWH 8223.685 Hz  
FIDRES 0.125483 Hz  
AQ 3.9846387 sec  
RG 71.8  
DW 60.800 usec  
DE 6.50 usec  
TE 299.5 K  
D1 1.00000000 sec  
TD0 1

===== CHANNEL f1 =====  
NUC1 1H  
P1 14.00 usec  
PL1 -1.00 dB  
PL1W 13.56617069 W  
SFO1 400.1924713 MHz  
SI 32768  
SF 400.1900173 MHz  
WDW EM  
SSB 0  
LB 0.30 Hz  
GB 0  
PC 1.00

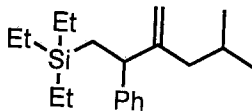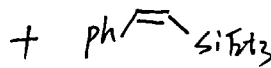

ratio 1 : 3

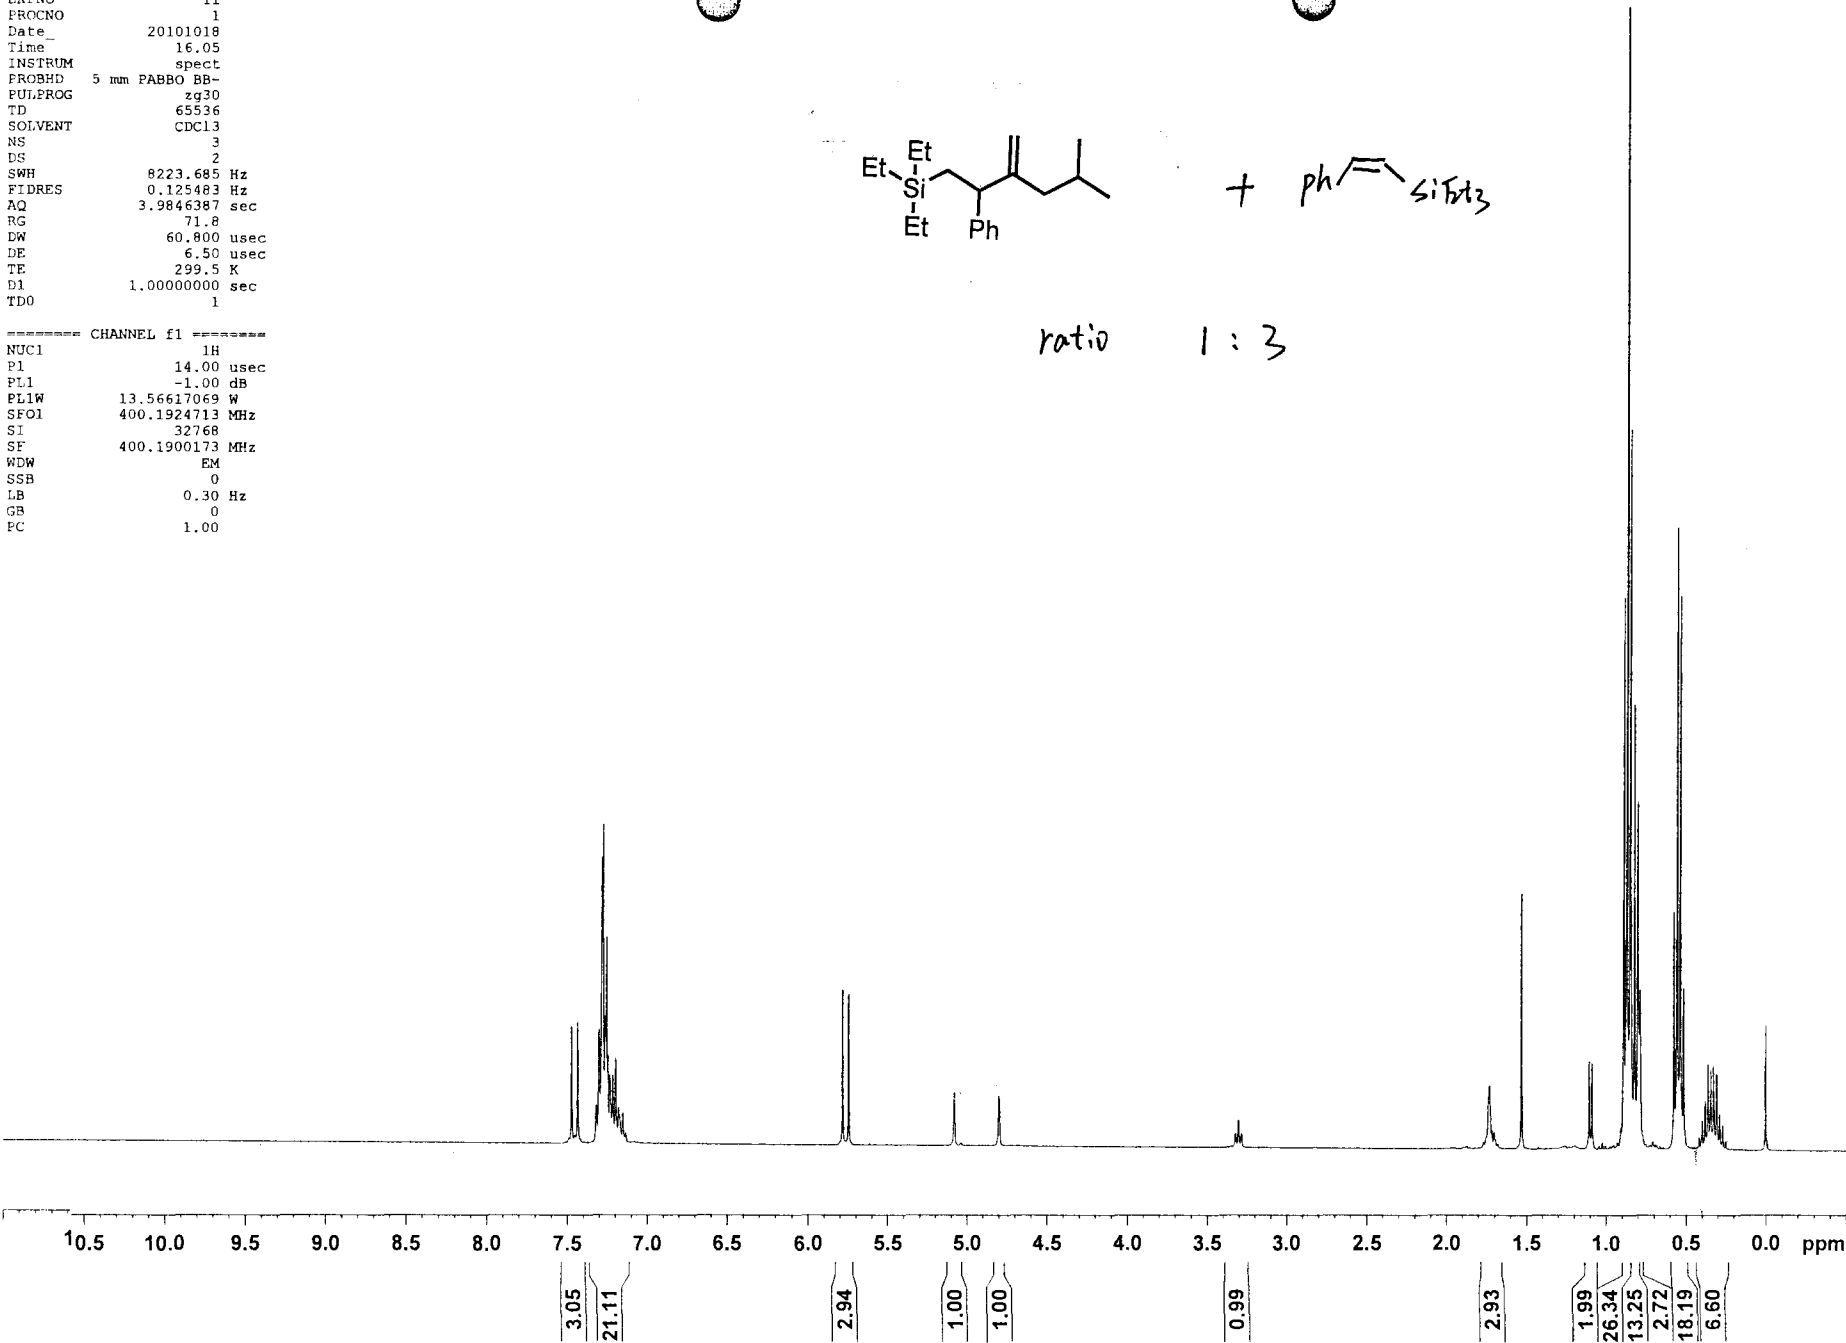

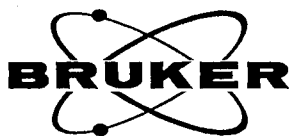

NAME hls-2-7-1 t9  
EXPNO 2  
PROCNO 1  
Date\_ 20101018  
Time 18.11  
INSTRUM spect  
PROBHD 5 mm PABBO BB-  
PULPROG zgpg30  
TD 65536  
SOLVENT CDCl3  
NS 342  
DS 4  
SWH 24038.461 Hz  
FIDRES 0.366798 Hz  
AQ 1.3631988 sec  
RG 161  
DW 20.800 usec  
DE 6.50 usec  
TE 299.2 K  
D1 2.00000000 sec  
D11 0.03000000 sec  
TD0 1

===== CHANNEL f1 =====  
NUC1 13C  
P1 9.90 usec  
PL1 -2.00 dB  
PL1W 55.33689499 W  
SFO1 100.6379183 MHz

===== CHANNEL f2 =====  
CPDPRG2 waltz16  
NUC2 1H  
PCPD2 90.00 usec  
PL2 -1.00 dB  
PL12 15.16 dB  
PL13 18.62 dB  
PL2W 13.56617069 W  
PL12W 0.32844096 W  
PL13W 0.14806664 W  
SFO2 400.1916008 MHz  
SI 32768  
SF 100.6278427 MHz  
WDW EM  
SSB 0  
LB 1.00 Hz  
GB 0  
PC 1.40

153.66  
147.85  
140.66  
129.60  
128.19  
128.12  
127.98  
127.45  
126.19  
109.25

77.47  
77.16  
76.84

46.92  
45.00

26.37  
23.05  
22.31  
17.42

7.61  
7.49  
4.88  
3.69

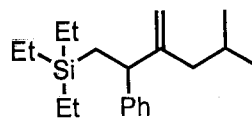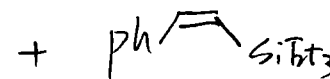

ratio 1 : 3

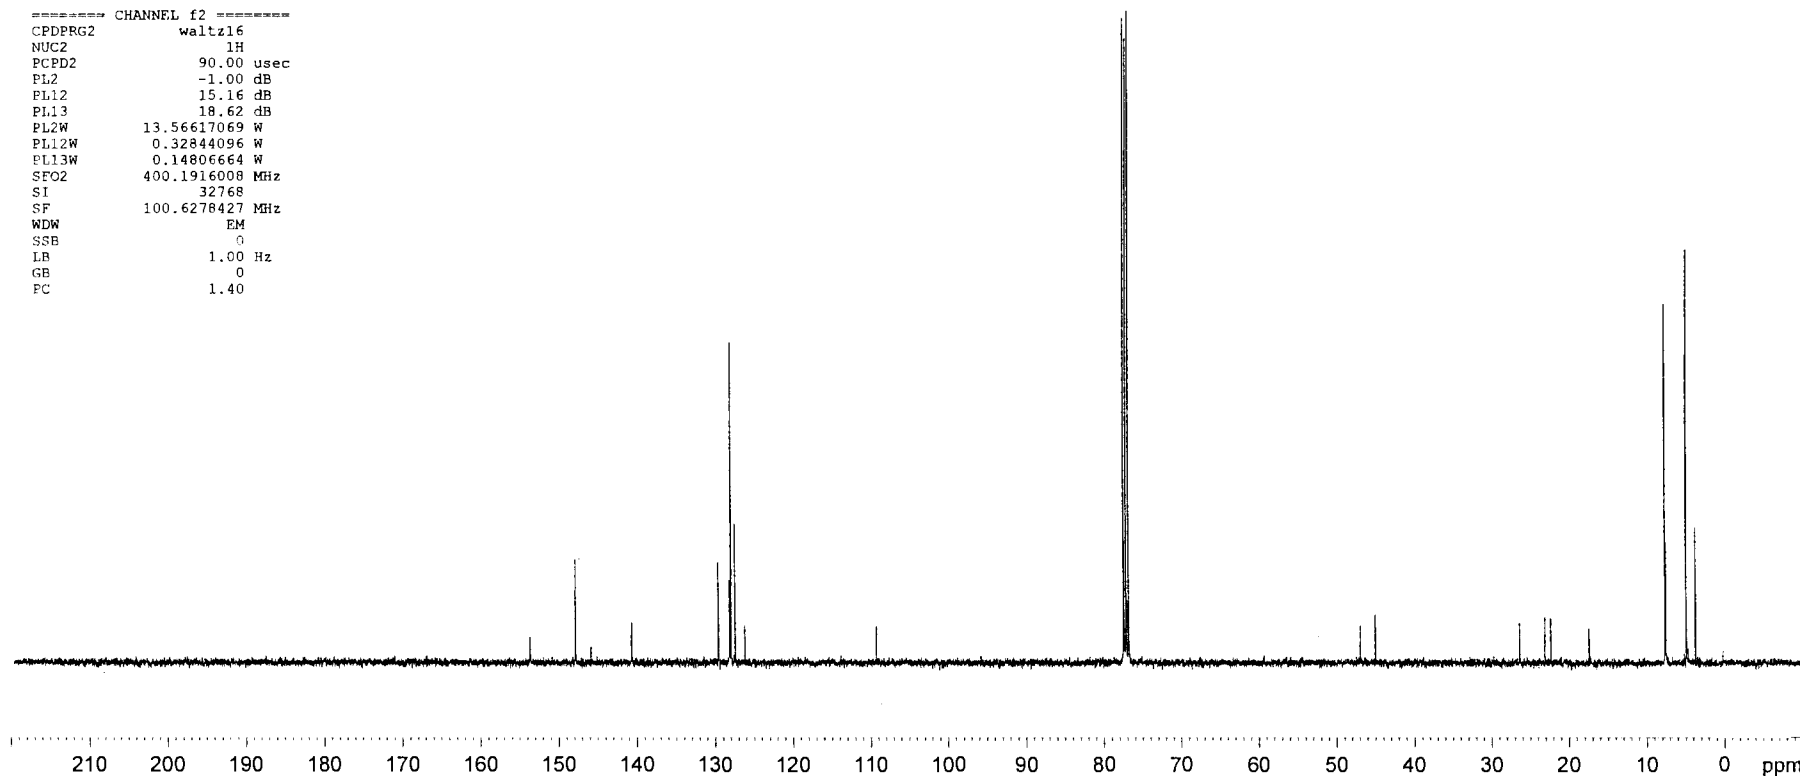

NAME hls-1-246-3-t30  
EXPNO 1  
PROCNO 1  
Date\_ 20100616  
Time 20.08  
INSTRUM spect  
PROBHD 5 mm PABBI 1H/  
PULPROG zg30  
TD 65536  
SOLVENT CDCl3  
NS 2  
DS 0  
SWH 10000.000 Hz  
FIDRES 0.152588 Hz  
AQ 3.2768500 sec  
RG 80.6  
DW 50.000 usec  
DE 6.50 usec  
TE 297.2 K  
D1 5.0000000 sec  
TD0 1

===== CHANNEL f1 =====  
NUC1 1H  
P1 7.10 usec  
PL1 -2.00 dB  
PL1W 13.17734718 W  
SF01 400.1316005 MHz  
SI 65536  
SF 400.1300131 MHz  
WDW EM  
SSB 0  
LB 0.30 Hz  
GB 0  
PC 1.00

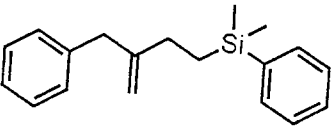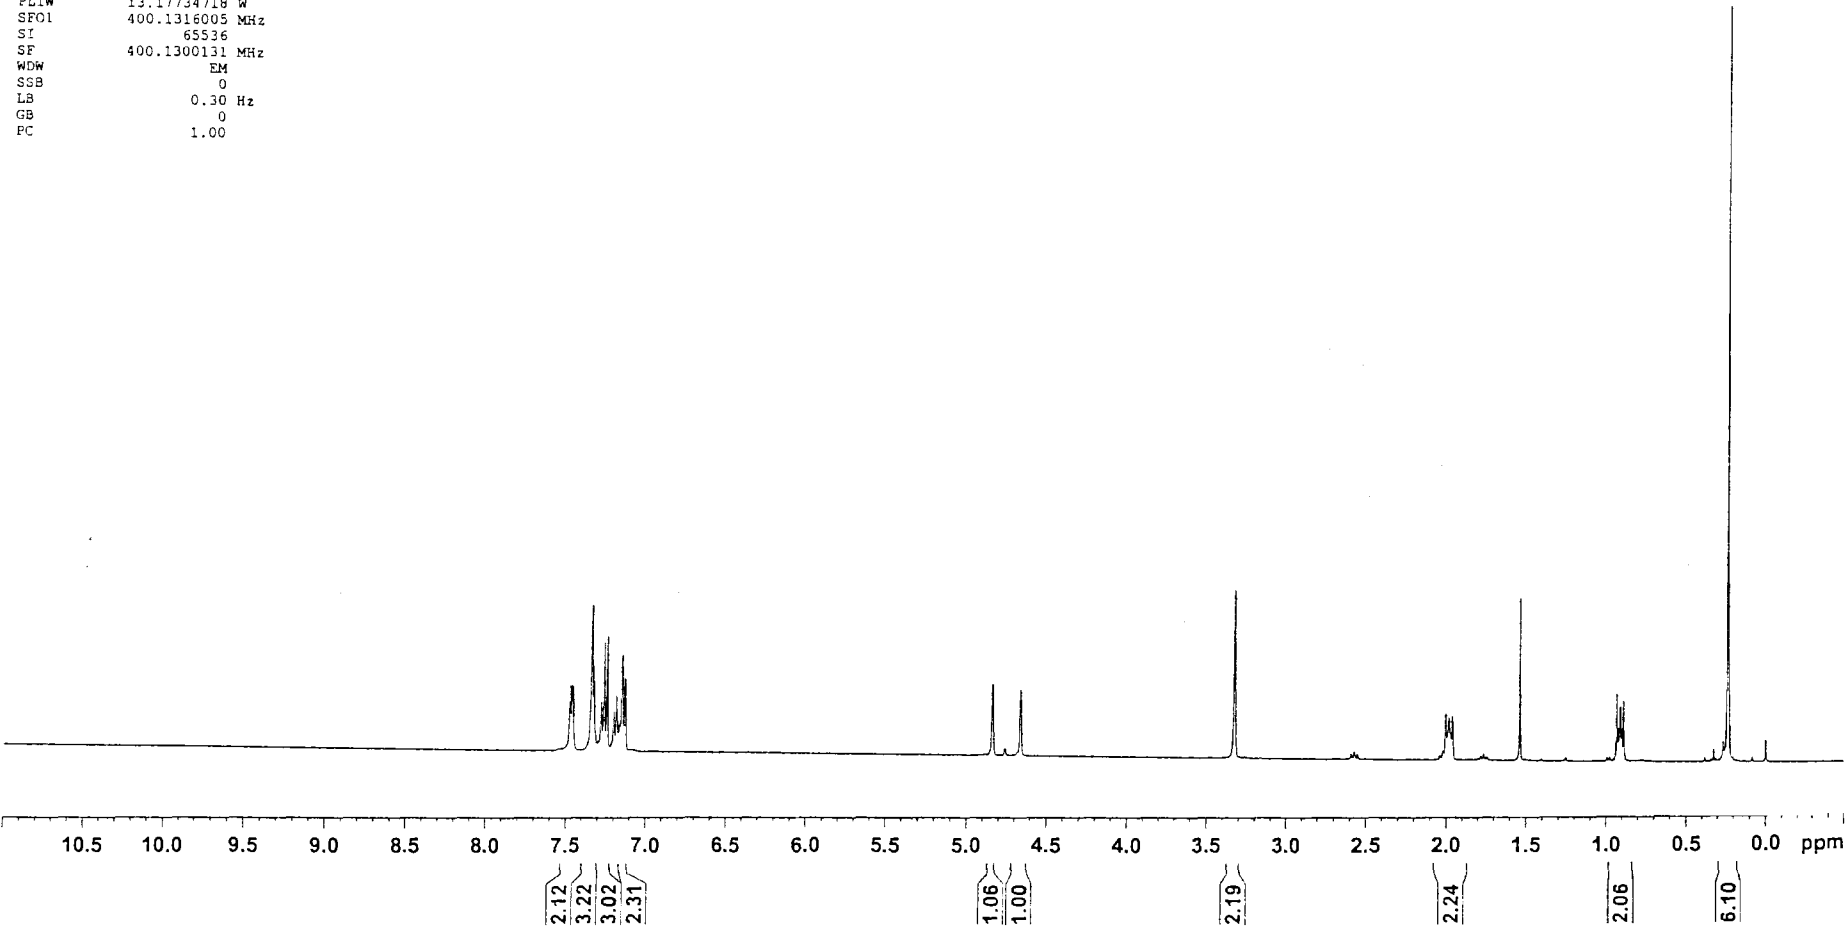

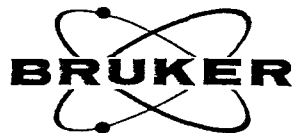

NAME hls-1-246-3-t30  
EXPNO 2  
PROCNO 1  
Date\_ 20100616  
Time\_ 20.55  
INSTRUM spect  
PROBHD 5 mm PABBI 1H/  
PULPROG zgpg30  
TD 65536  
SOLVENT CDCl3  
NS 100  
DS 4  
SWH 24038.461 Hz  
FIDRES 0.366798 Hz  
AQ 1.3631988 sec  
RG 203  
DW 20.800 usec  
DE 6.50 usec  
TE 297.2 K  
D1 2.00000000 sec  
D11 0.03000000 sec  
TD0 1

----- CHANNEL f1 -----  
NUC1 13C  
P1 14.50 usec  
PL1 -4.00 dB  
PL1W 90.22689819 W  
SFO1 100.6228298 MHz

----- CHANNEL f2 -----  
CPDPRG2 waltz16  
NUC2 1H  
PCPD2 80.00 usec  
PL2 -2.00 dB  
PL12 18.80 dB  
PL13 18.80 dB  
PL2W 13.17734718 W  
PL12W 0.10960442 W  
PL13W 0.10960442 W  
SFO2 400.1316005 MHz  
SI 32768  
SF 100.6127553 MHz  
WDW EM  
SSB 0  
LB 1.00 Hz  
GB 0  
PC 1.40

151.65  
139.96  
133.69  
129.17  
128.99  
128.37  
127.88  
126.11

110.11

77.48  
77.16  
76.84

42.73

29.80

13.91

-2.99

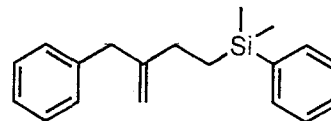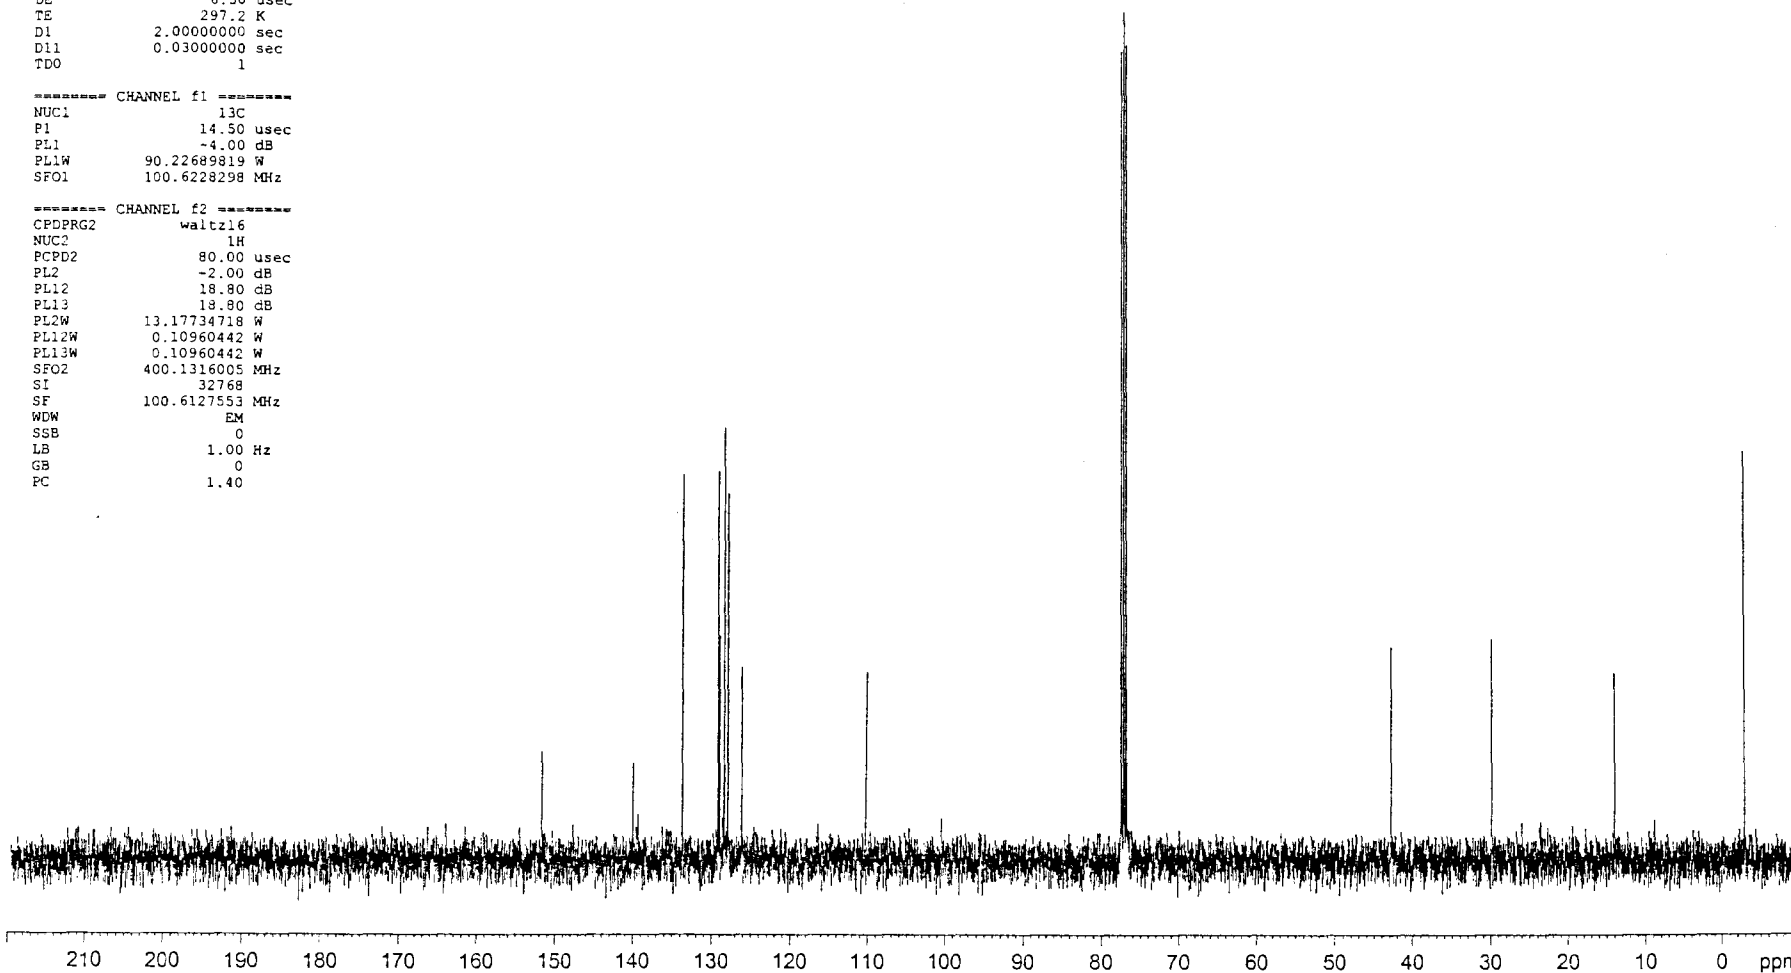

NAME his-1-232-3-t2526  
EXPNO 1  
PROCNO 1  
Date\_ 20100526  
Time 20.11  
INSTRUM spect  
PROBHD 5 mm PABBI 1H/  
PULPROG zg30  
TD 65536  
SOLVENT CDCl3  
NS 11  
DS 0  
SWH 10000.000 Hz  
FIDRES 0.152588 Hz  
AQ 3.2768500 sec  
RG 50.8  
DW 50.000 usec  
DE 6.50 usec  
TE 294.4 K  
D1 5.00000000 sec  
TD0 1

===== CHANNEL f1 =====  
NUC1 1H  
P1 7.10 usec  
PL1 -2.00 dB  
PL1W 13.17734718 W  
SFO1 400.1316005 MHz  
SI 65536  
SF 400.1300191 MHz  
WDW EM  
SSB 0  
LB 0.30 Hz  
GB 0  
PC 1.00

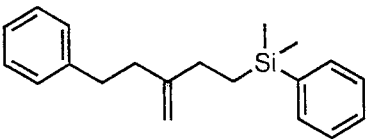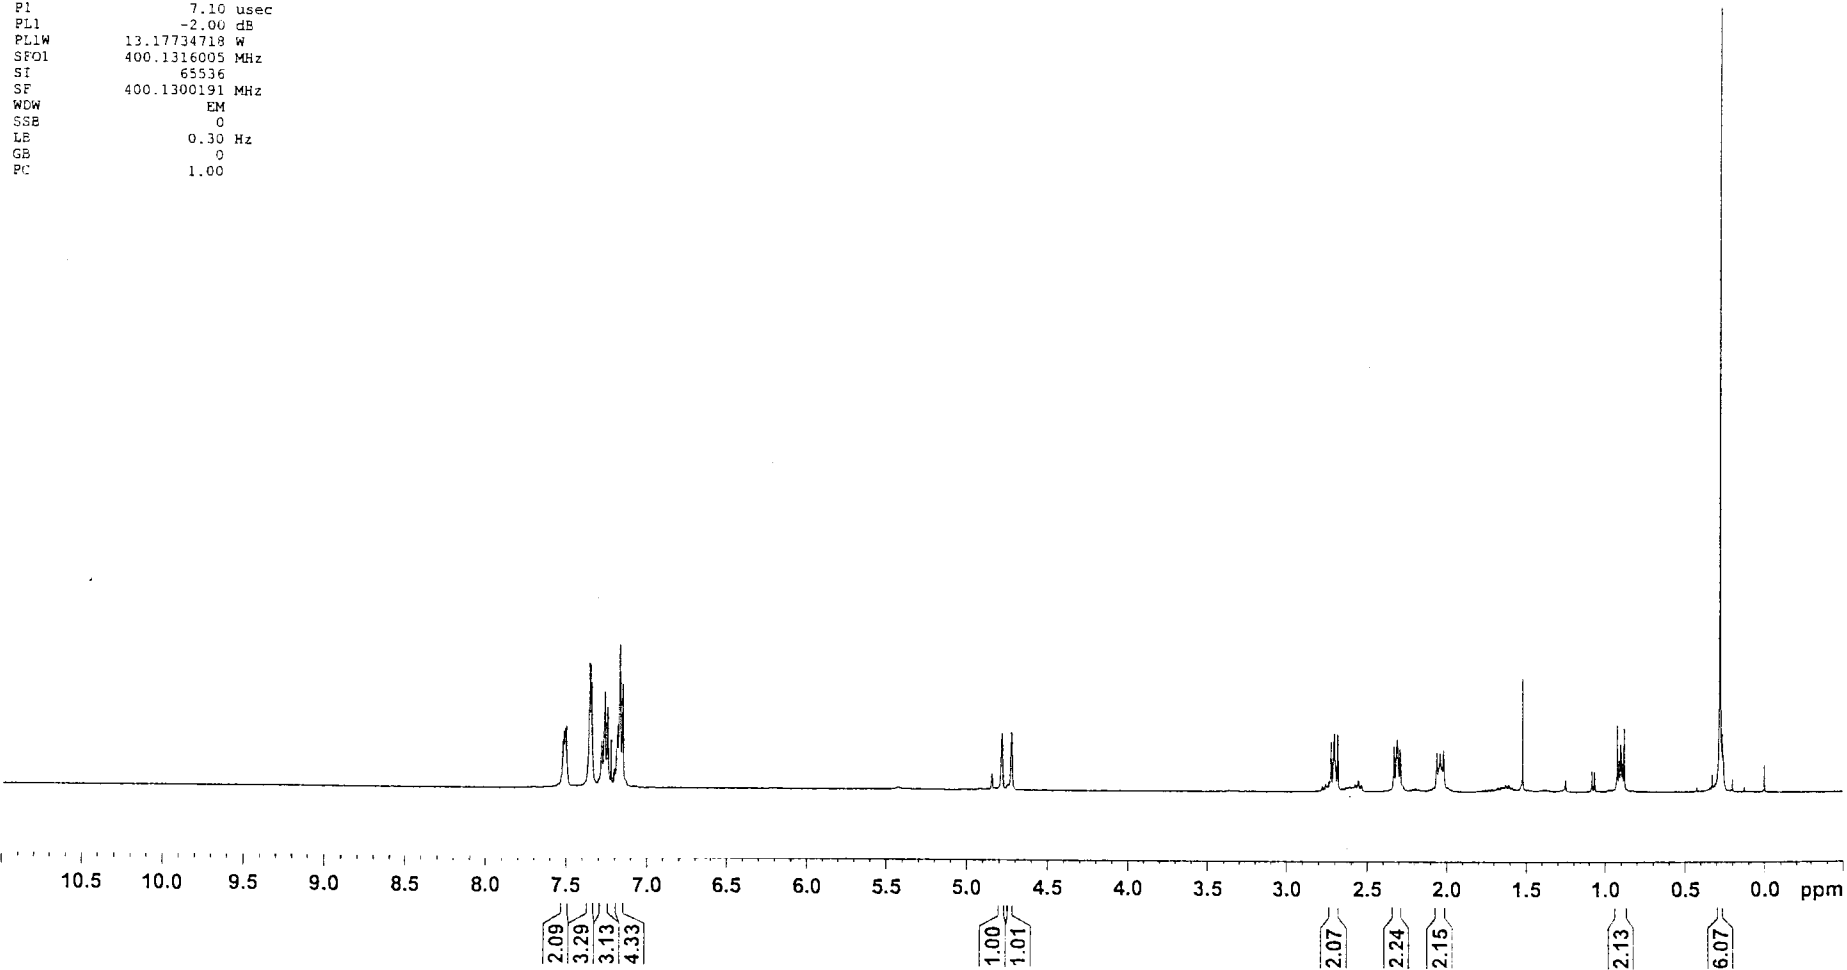

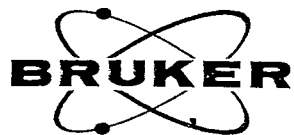

NAME his-1-238-1-t2926  
EXPNO 2  
PROCNO 1  
Date\_ 20100526  
Time\_ 21.28  
INSTRUM spect  
PROBHD 5 mm PABBI 1H/  
PULPROG zgpg30  
TD 65536  
SOLVENT CDCl3  
NS 46  
DS 4  
SWH 24038.461 Hz  
FIDRES 0.366798 Hz  
AQ 1.3631988 sec  
RG 203  
DW 20.800 usec  
DE 6.50 usec  
TE 295.2 K  
D1 2.00000000 sec  
D11 0.03000000 sec  
TD0 1

----- CHANNEL f1 -----  
NUC1 13C  
P1 14.50 usec  
PL1 -4.00 dB  
PL1W 90.22689819 W  
SFO1 100.6228298 MHz

----- CHANNEL f2 -----  
CPDPRG2 waltz16  
NUC2 1H  
PCPD2 80.00 usec  
PL2 -2.00 dB  
PL12 18.80 dB  
PL13 18.80 dB  
PL2W 13.17734718 W  
PL12W 0.10960442 W  
PL13W 0.10960442 W  
SFO2 400.1316005 MHz  
SI 32768  
SF 100.6127583 MHz  
WDW EM  
SSB 0  
LB 1.00 Hz  
GB 0  
PC 1.40

151.79  
142.43  
139.29  
133.70  
129.02  
128.45  
128.42  
127.90  
125.89

108.14

77.47  
77.16  
76.84

37.71  
34.51  
30.53

13.94

-2.99

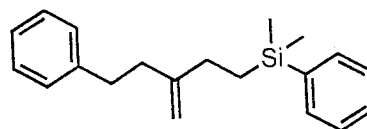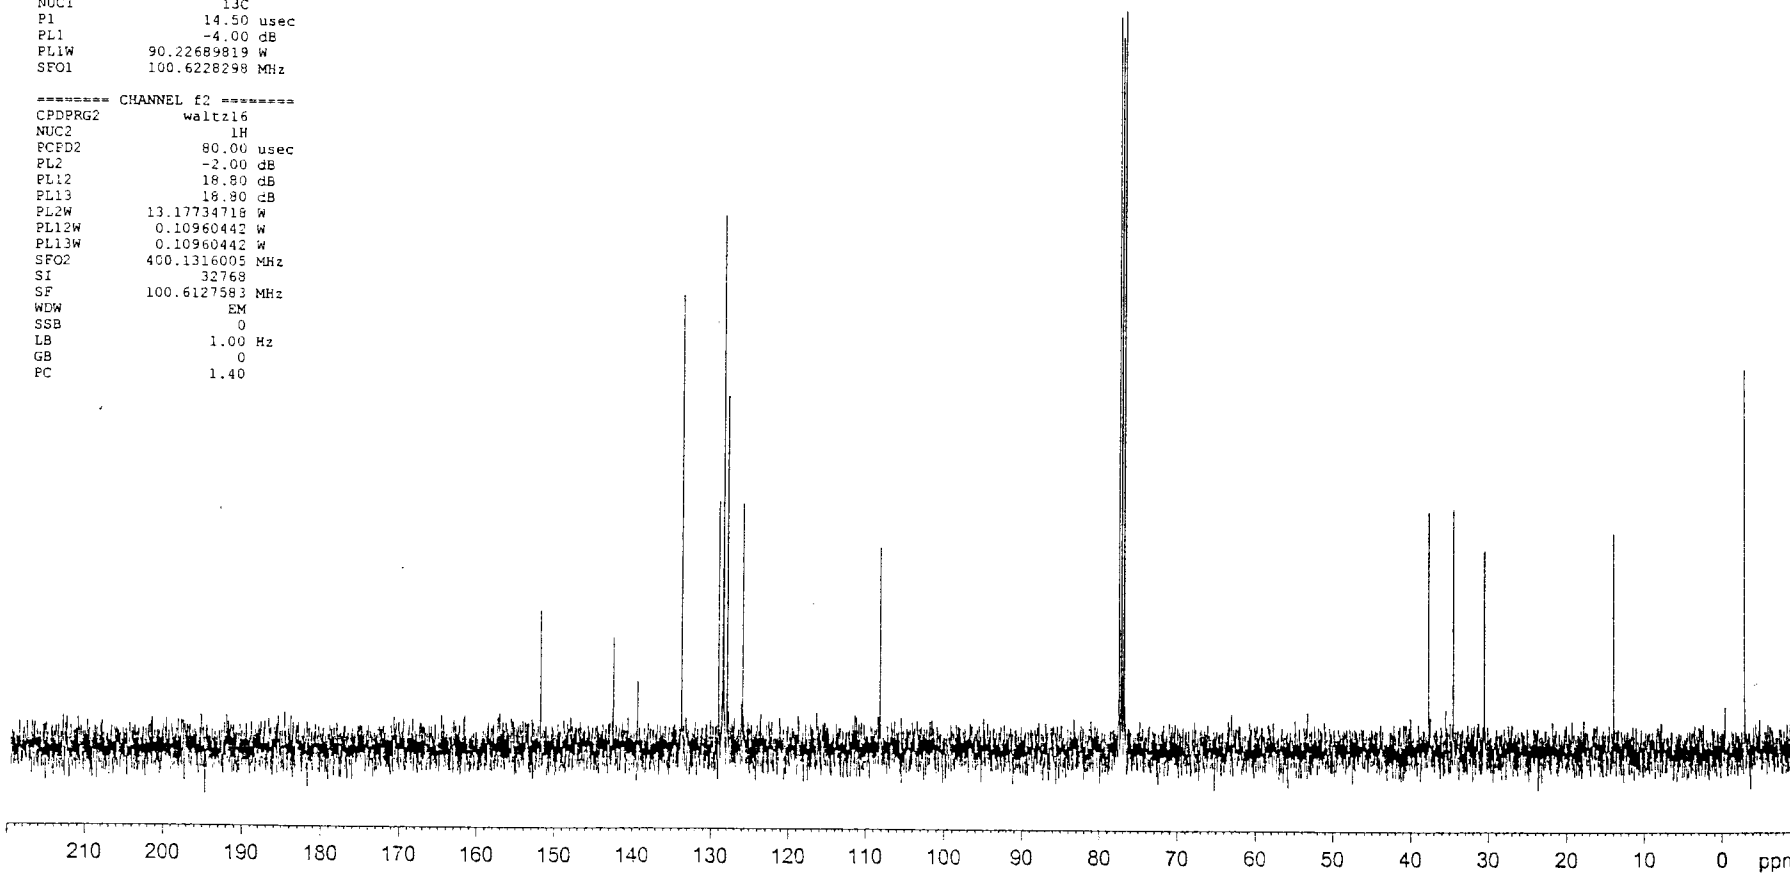



NAME his-2-17-2-t15  
EXPNO 1  
PROCNO 1  
Date\_ 20101009  
Time 12.30  
INSTRUM spect  
PROBHD 5 mm PABBO BB-  
PULPROG zg30  
TD 65536  
SOLVENT CDCl3  
NS 2  
DS 1  
SWH 8223.685 Hz  
FIDRES 0.125483 Hz  
AQ 3.9846387 sec  
RG 128  
DW 60.800 usec  
DE 6.50 usec  
TE 298.3 K  
D1 5.00000000 sec  
TD0 1

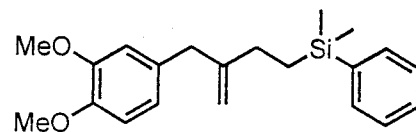

===== CHANNEL f1 =====  
NUC1 1H  
P1 14.00 usec  
PL1 -1.00 dB  
PL1W 13.56617069 W  
SF01 400.1924713 MHz  
SI 32768  
SF 400.1900147 MHz  
WDW EM  
SSB 0  
LB 0.30 Hz  
GB 0  
PC 1.00

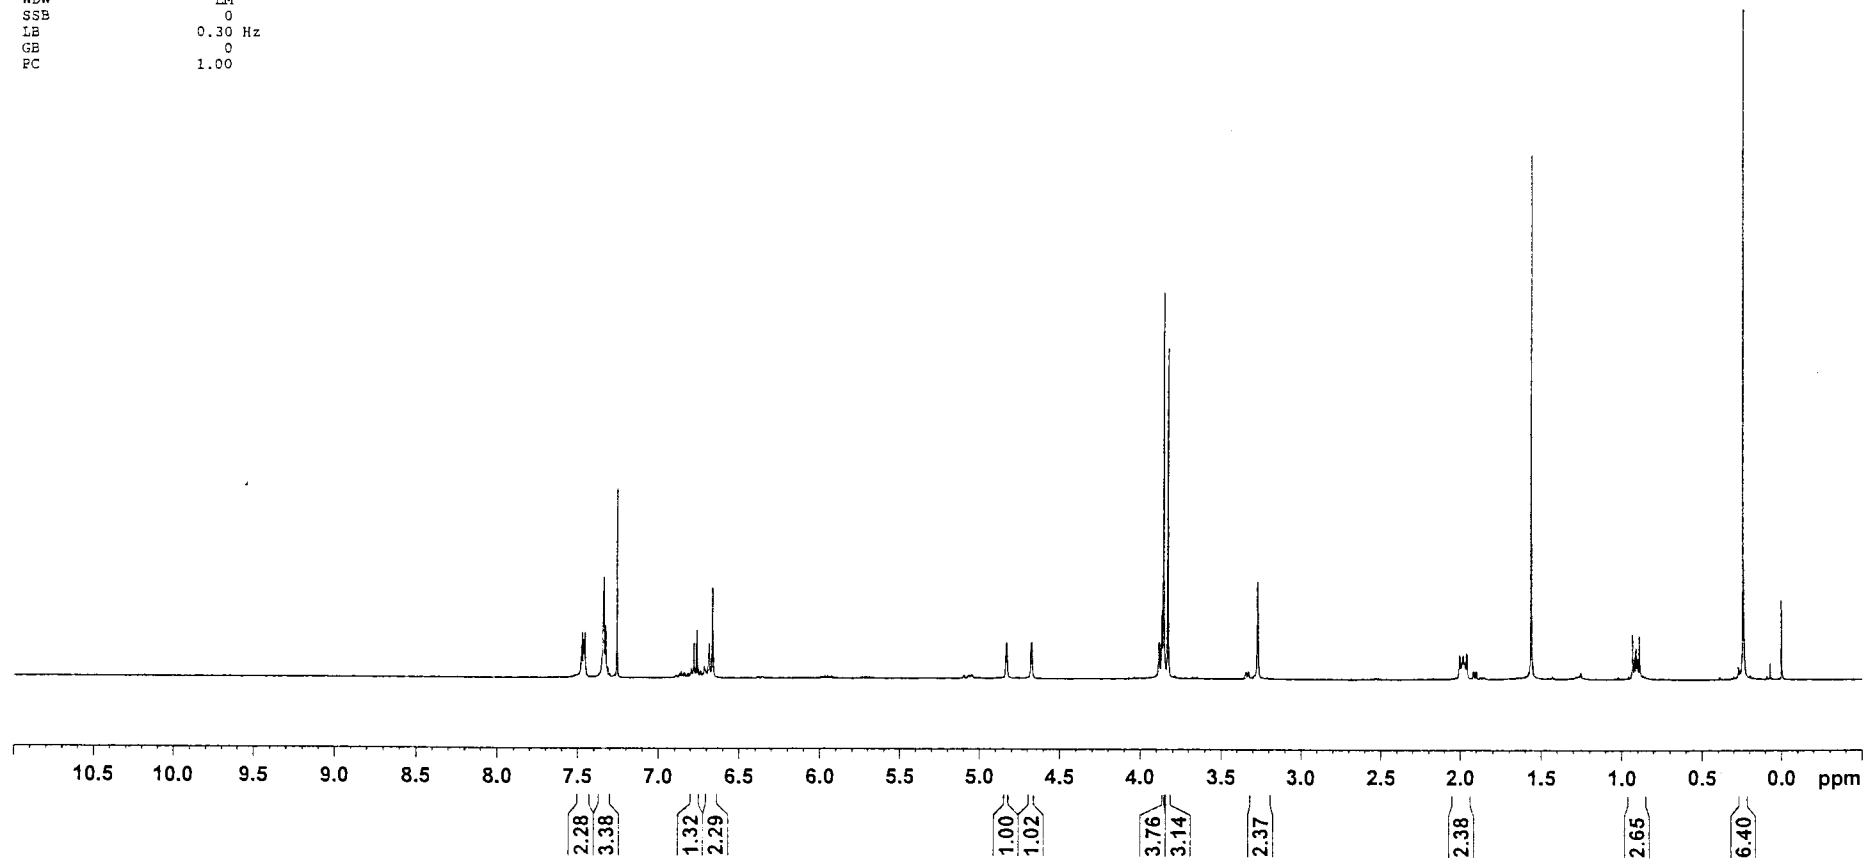

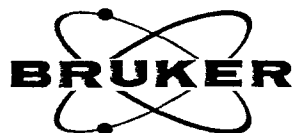

NAME hls-2-17-2-t15  
EXPNO 2  
PROCNO 1  
Date\_ 20101009  
Time 13.18  
INSTRUM spect  
PROBHD 5 mm PABBO BB-  
PULPROG zgpg30  
TD 65536  
SOLVENT CDCl3  
NS 709  
DS 4  
SWH 24038.461 Hz  
FIDRES 0.366798 Hz  
AQ 1.3631988 sec  
RG 181  
DW 20.800 usec  
DE 6.50 usec  
TE 298.7 K  
D1 2.00000000 sec  
D11 0.03000000 sec  
TD0 1

----- CHANNEL f1 -----  
NUC1 13C  
P1 9.90 usec  
PL1 -2.00 dB  
PL1W 55.33689499 W  
SFO1 100.6379183 MHz

----- CHANNEL f2 -----  
CPDPRG2 waltz16  
NUC2 1H  
PCPD2 90.00 usec  
PL2 -1.00 dB  
PL12 15.16 dB  
PL13 18.62 dB  
PL2W 13.56617069 W  
PL12W 0.32844096 W  
PL13W 0.14806664 W  
SFO2 400.1916003 MHz  
SI 32768  
SF 100.6278427 MHz  
WDW EM  
SSB 0  
LB 1.00 Hz  
GB 0  
PC 1.40

151.90  
148.90  
147.46  
139.31  
133.68  
132.55  
129.00  
127.88  
121.13  
112.35  
111.21  
109.90  
77.48  
77.16  
76.84  
56.05  
55.93  
42.36  
29.73  
13.95  
-2.97

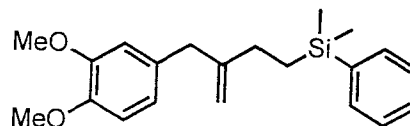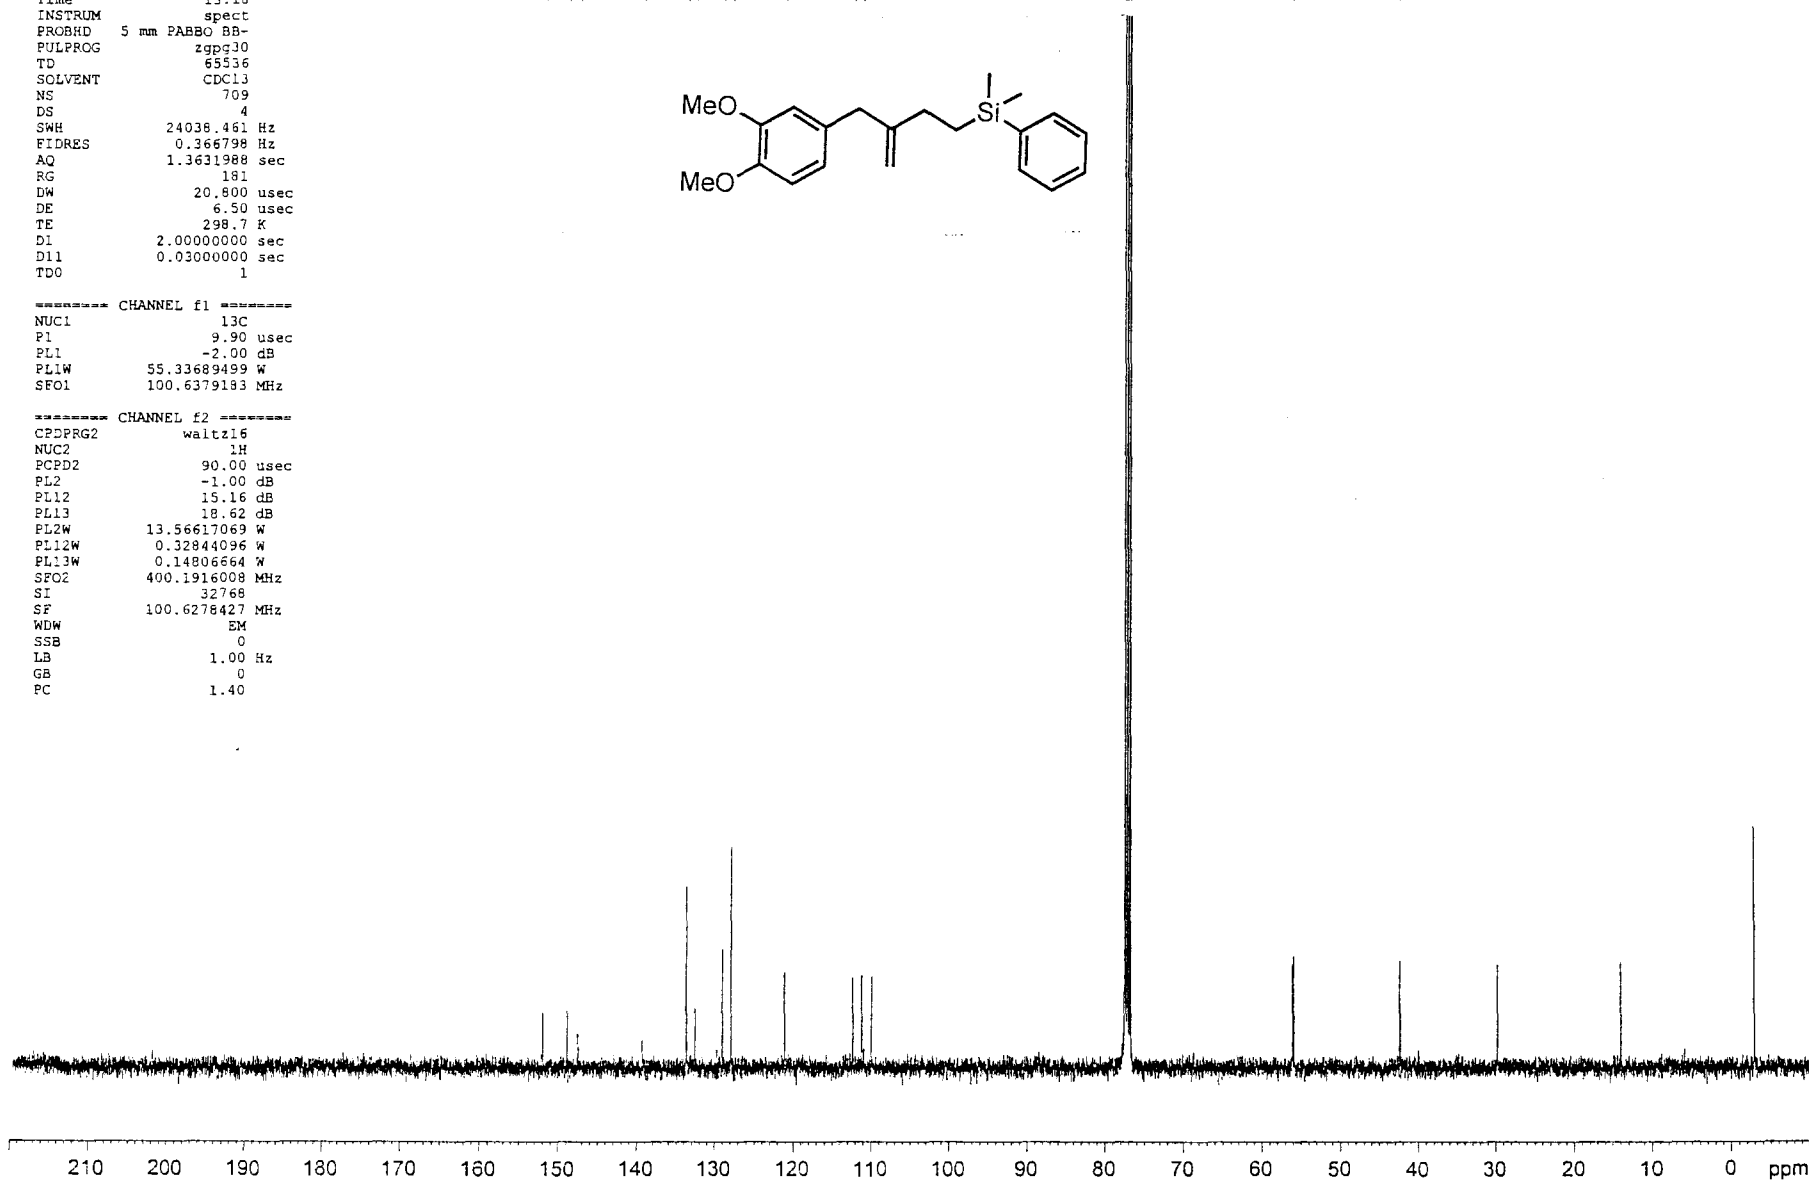

NAME his-2-11-5-c30  
EXPNO 1  
PROCNO 1  
Date\_ 20100905  
Time\_ 18.14  
INSTRUM spect  
PROBHD 5 mm PABBI 1H/  
PULPROG zg30  
TD 65536  
SOLVENT CDCl3  
NS 5  
DS 0  
SWH 10000.000 Hz  
FIDRES 0.152588 Hz  
AQ 3.2768500 sec  
RG 203  
EW 50.000 usec  
DE 6.50 usec  
TE 296.3 K  
D1 5.00000000 sec  
TDC 1

----- CHANNEL f1 -----  
NUC1 1H  
P1 7.10 usec  
PL1 -2.00 dB  
PL1W 13.17734719 W  
SFO1 400.1316003 MHz  
SI 65536  
SF 400.1300051 MHz  
WDW EM  
SSB 0  
LB 0.30 Hz  
GB 0  
PC 1.00

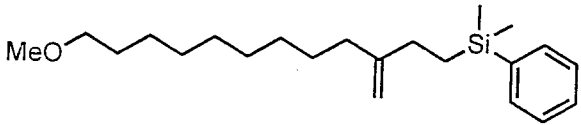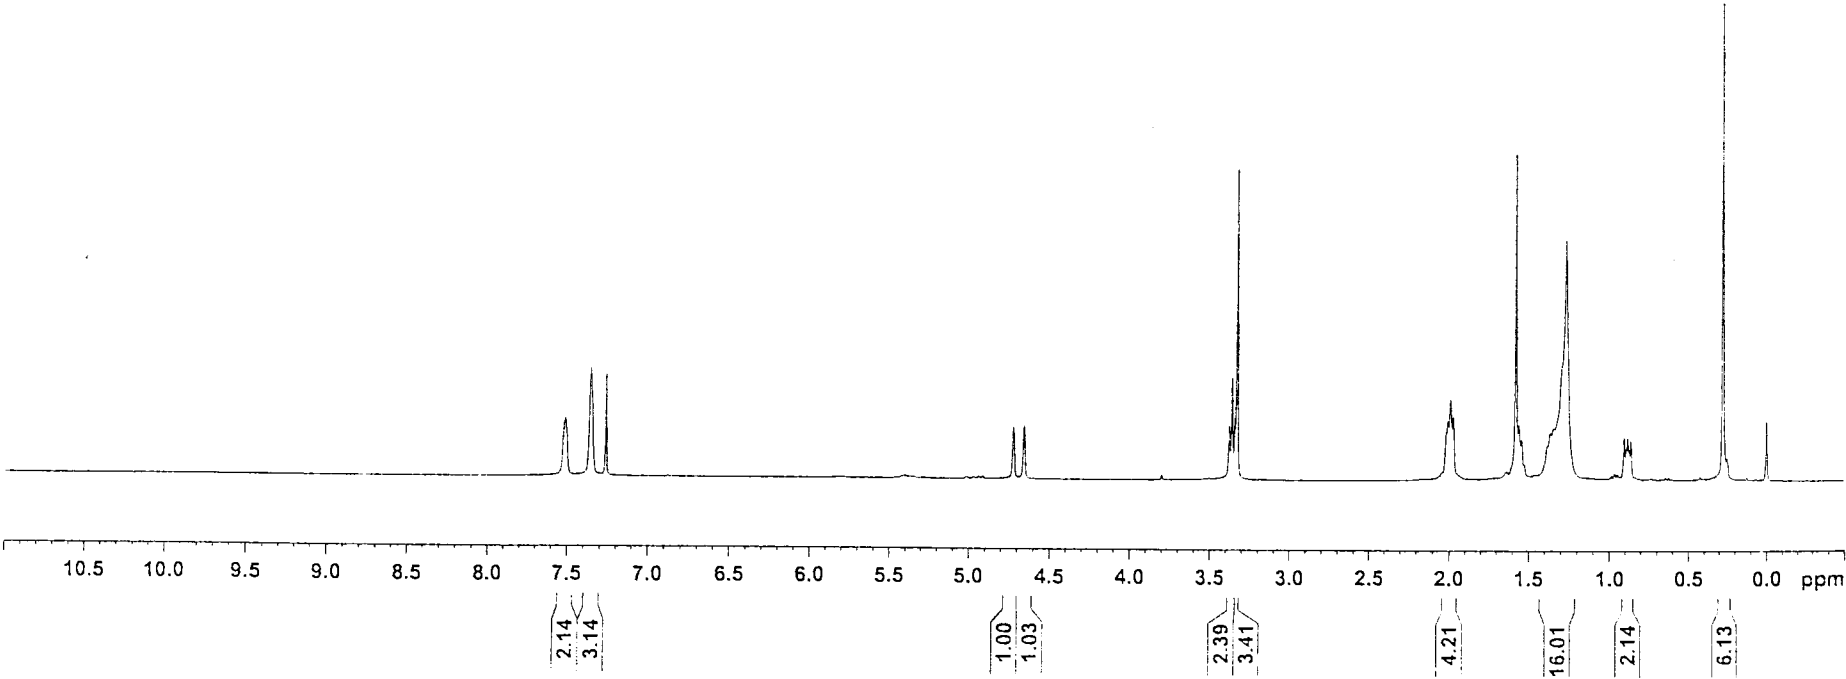

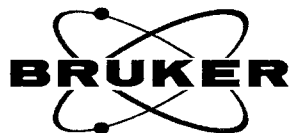

NAME: bis-13-5-13-5  
EXPNO: 4  
PROCNO: 1  
Date\_: 20100905  
Time: 15.18  
INSTRUM: spect  
PROBHD: 5 mm PABBI 1H/  
PULPROG: zgpg30  
TE: 300.2  
SOLVENT: DMSO-d6  
NS: 1024  
DS: 4  
SWH: 24038.461 Hz  
FIDRES: 0.366799 Hz  
AQ: 1.3631988 sec  
RG: 203  
RW: 20.800 usec  
DE: 6.50 usec  
TE: 296.4 K  
DI: 2.0000000 sec  
EI: 0.0300000 sec  
TD: 1

===== CHANNEL f1 =====  
NUC1: 13C  
P1: 14.50 usec  
PL1: -4.00 dB  
PL1W: 99.22689819 W  
SFO1: 100.6228199 MHz

===== CHANNEL f2 =====  
SFO2: 400.146001 MHz  
NUC2: 1H  
P2: 12.00 usec  
PL2: -2.00 dB  
PL21: 13.00 dB  
PL22: 13.00 dB  
PL23: 13.00 dB  
PL2W: 13.10734719 W  
PL21W: 99.10900441 W  
PL22W: 99.10900441 W  
SFO2: 400.146001 MHz  
SI: 1.768  
SE: 100.6170540 MHz  
W2W: FM  
SSB: 0  
LB: 1.00 Hz  
GB: 0  
PC: 1.40

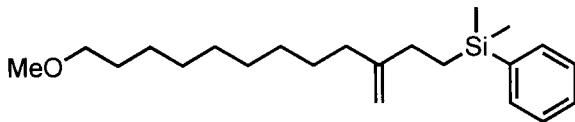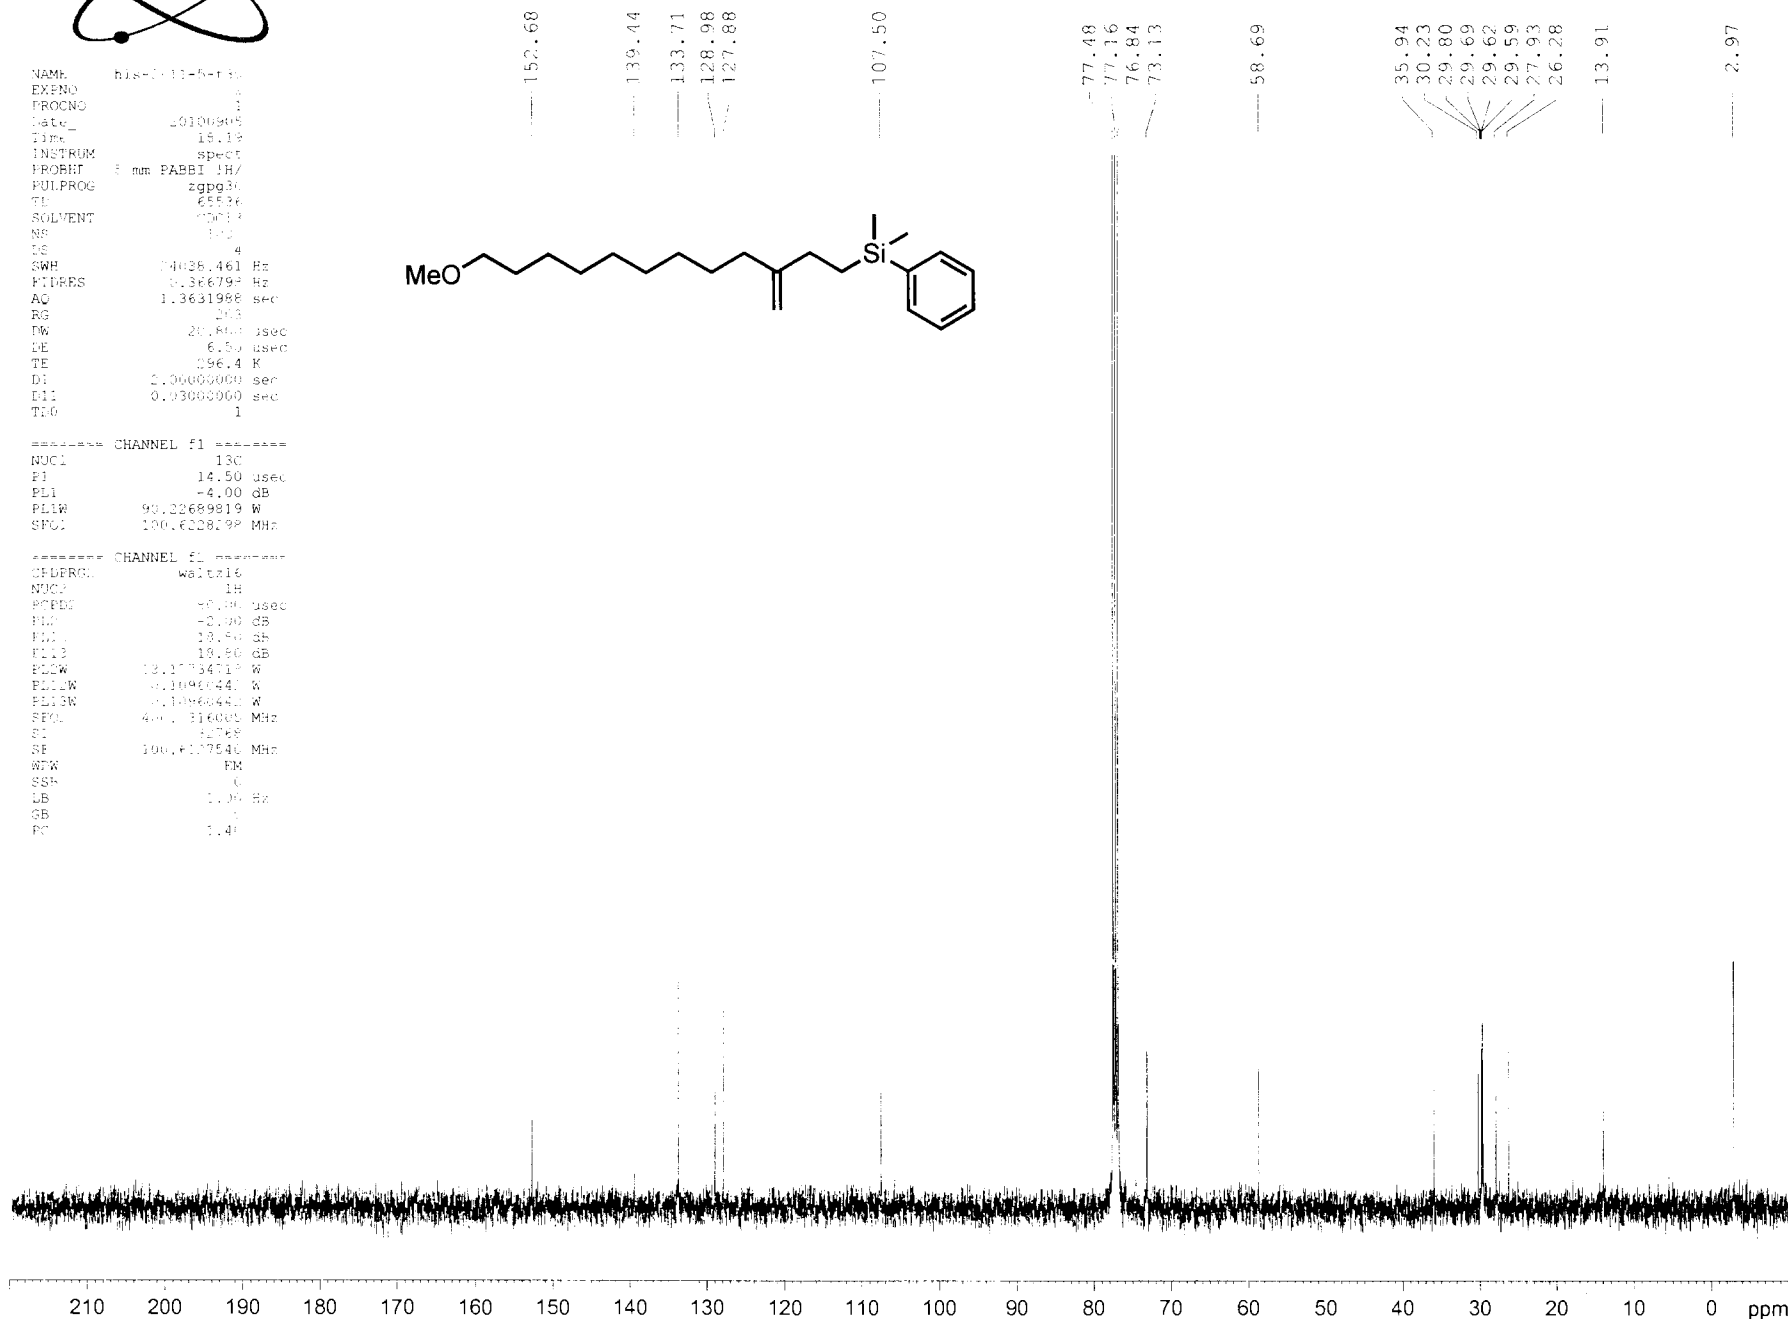

```

NAME      hls-2-11-6-t18
EXPNO     1
PROCNO    1
Date_     20100905
Time      17.57
INSTRUM   spect
PROBHD    5 mm PABBI 1H/
PULPROG   zg30
TD        65536
SOLVENT   CDCl3
NS        8
DS        0
SWH       10000.000 Hz
FIDRES    0.152588 Hz
AQ        3.2768500 sec
RG        114
DW        50.000 usec
DE        6.50 usec
TE        296.4 K
D1        5.00000000 sec
TD0       1

```

```

===== CHANNEL f1 =====
NUC1      1H
P1        7.10 usec
PL1       -2.00 dB
PL1W      12.17734719 W
SFO1      400.1316005 MHz
SI        65536
SF        400.1300081 MHz
WDW       EM
SSB       0
LB        0.30 Hz
GB        0
PC        1.00

```

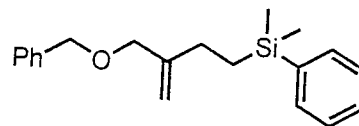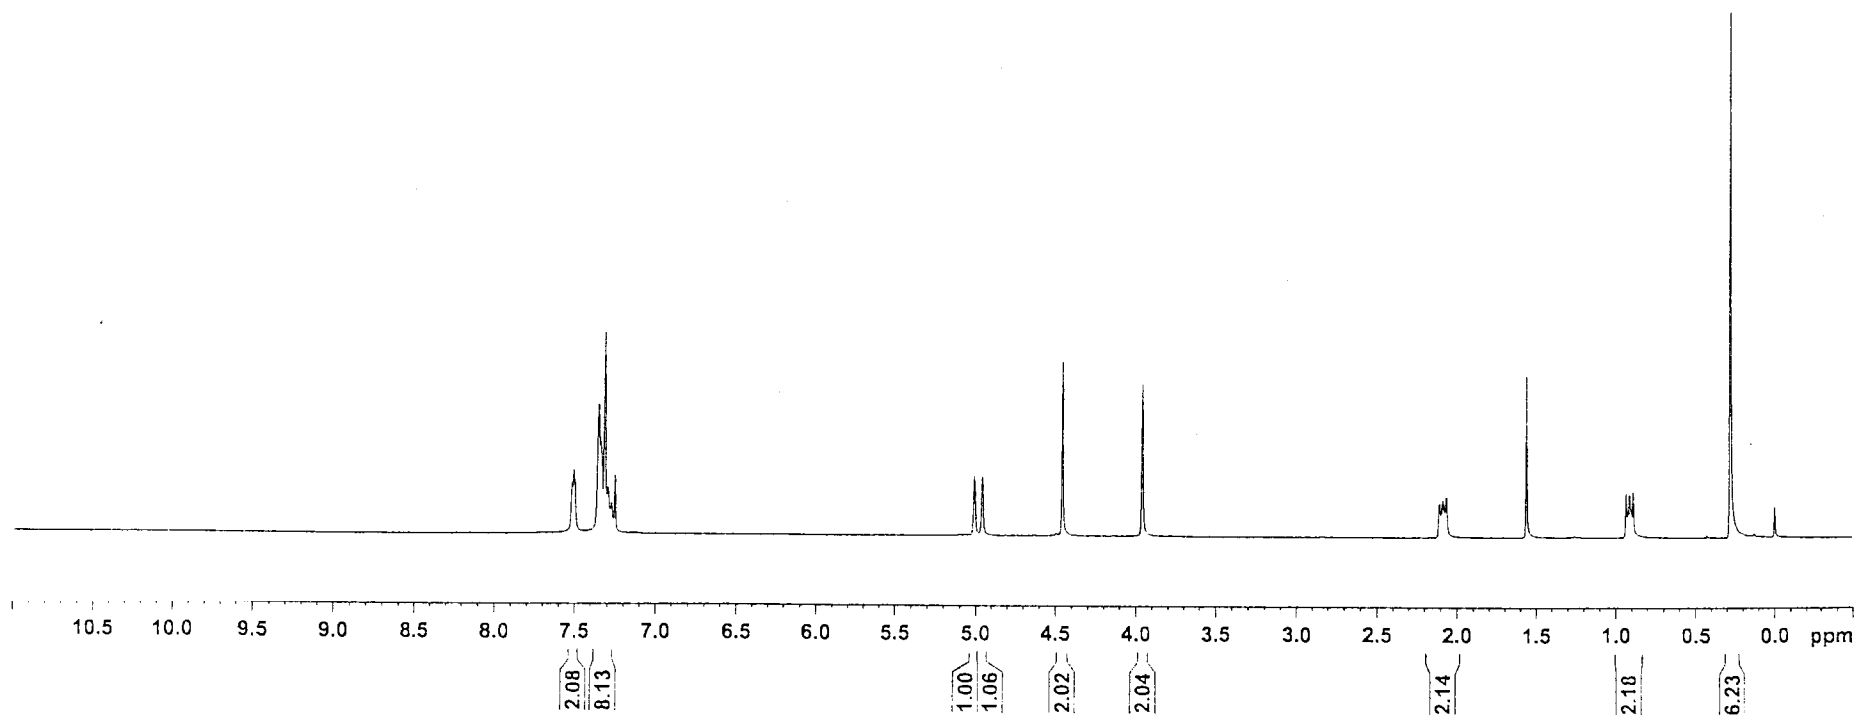

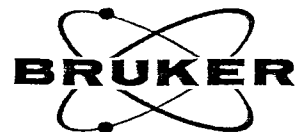

```

NAME      hls-2-11-6-t18
EXPNO     2
PROCNO    1
Date_     20100905
Time      18.06
INSTRUM   spect
PROBHD    5 mm PABBI 1H/
PULPROG   zgpg30
TD        65536
SOLVENT   CDCl3
NS        1175
DS        4
SWH       24038.461 Hz
FIDRES    0.366798 Hz
AQ        1.3631988 sec
RG        203
DW        20.800 usec
DE        6.50 usec
TE        296.6 K
D1        2.00000000 sec
D11       0.03000000 sec
TD0       1
  
```

```

===== CHANNEL f1 =====
NUC1      13C
P1        14.50 usec
PL1       -4.00 dB
PL1W      90.22689819 W
SFO1      100.6228298 MHz
  
```

```

===== CHANNEL f2 =====
CPDPRG2   waltz16
NUC2      1H
PCPD2     80.00 usec
PL2       -2.00 dB
PL12      18.80 dB
PL13      18.80 dB
PL2W      13.17734718 W
PL12W     0.10960442 W
PL13W     0.10960442 W
SFO2      400.1316005 MHz
SI        32768
SF        100.6127553 MHz
WDW       EM
SSB       0
LB        1.00 Hz
GB        0
PC        1.40
  
```

148.60  
 139.22  
 138.57  
 133.72  
 129.03  
 128.49  
 127.91  
 127.85  
 127.66  
 110.70  
 77.47  
 77.16  
 76.84  
 73.09  
 72.00

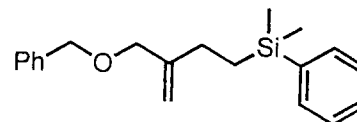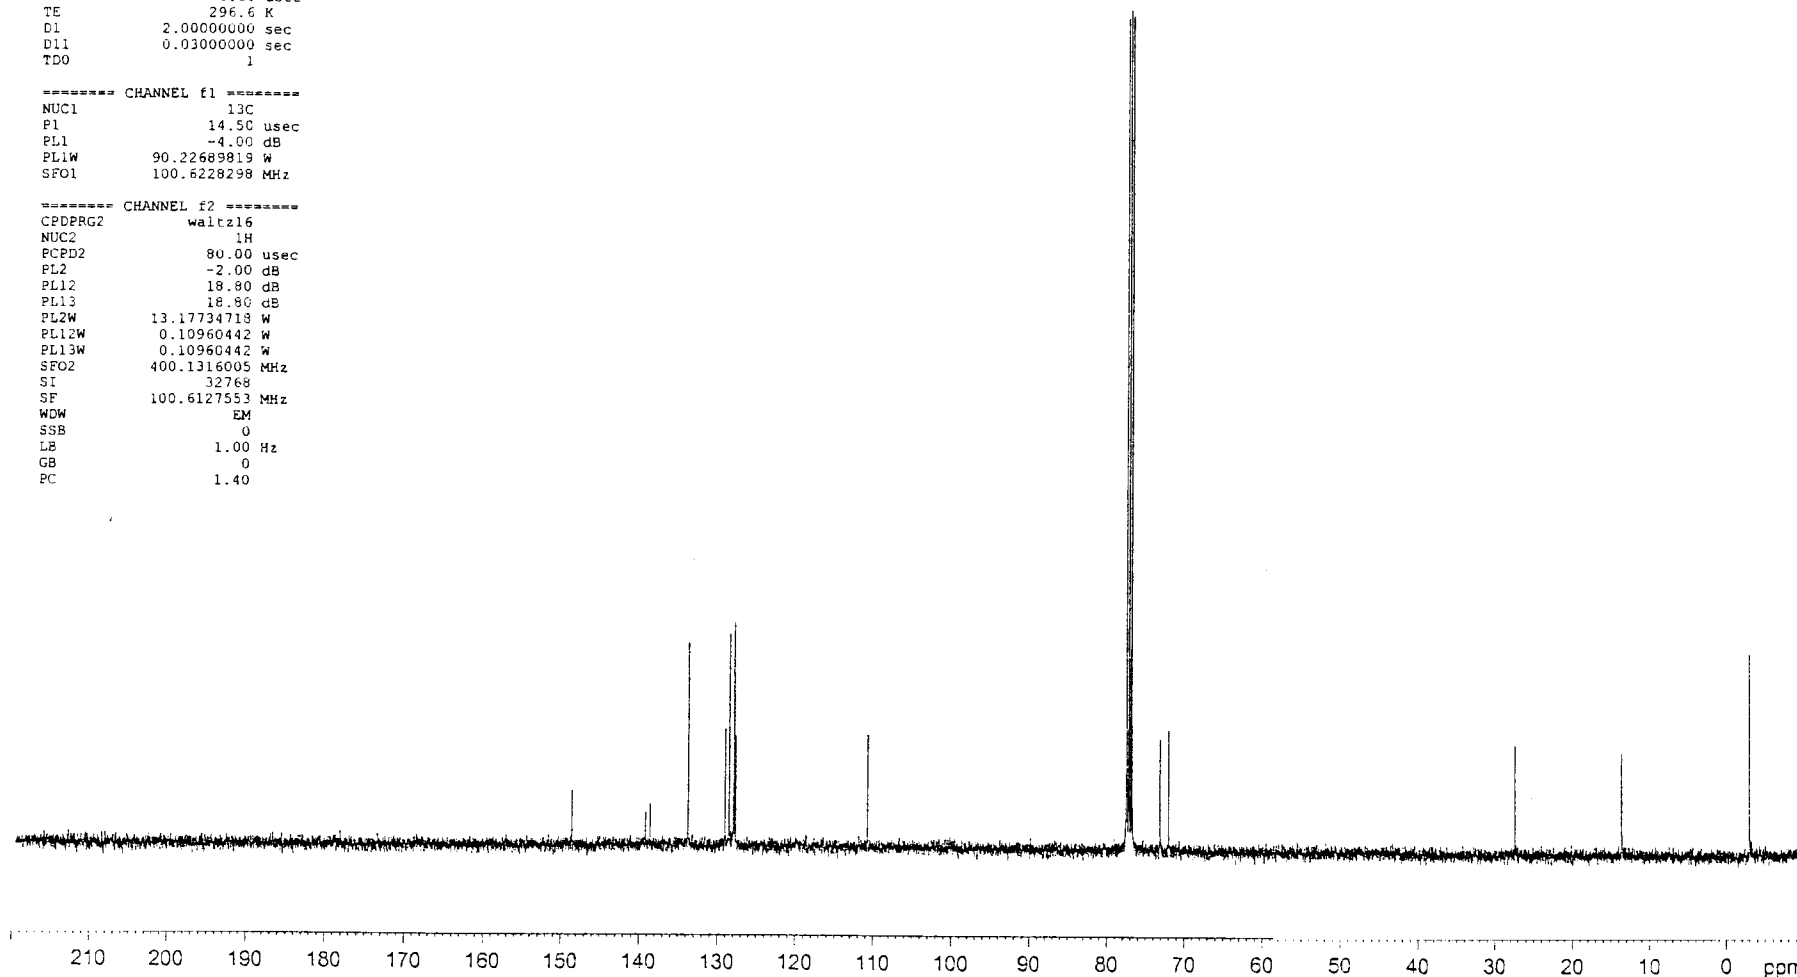

NAME hls-1-247-2-t65  
EXPNO 1  
PROCNO 1  
Date\_ 20100618  
Time\_ 16.05  
INSTRUM spect  
PROBHD 5 mm PABBI 1H/  
PULPROG zg30  
TD 65536  
SOLVENT CDCl3  
NS 6  
DS 0  
SWH 10000.000 Hz  
FIDRES 0.152588 Hz  
AQ 3.2768500 sec  
RG 203  
DW 50.000 usec  
DE 6.50 usec  
TE 294.2 K  
D1 5.00000000 sec  
TD0 1

===== CHANNEL f1 =====  
NUC1 1H  
P1 7.10 usec  
PL1 -2.00 dB  
PL1W 13.17734718 W  
SFO1 400.1316005 MHz  
S1 65536  
SF 400.1300038 MHz  
WDW EM  
SSB 0  
LB 0.30 Hz  
GB 0  
PC 1.00

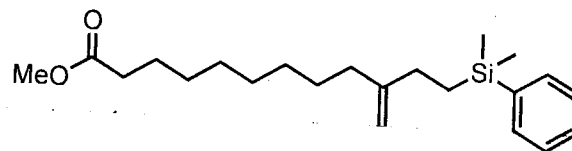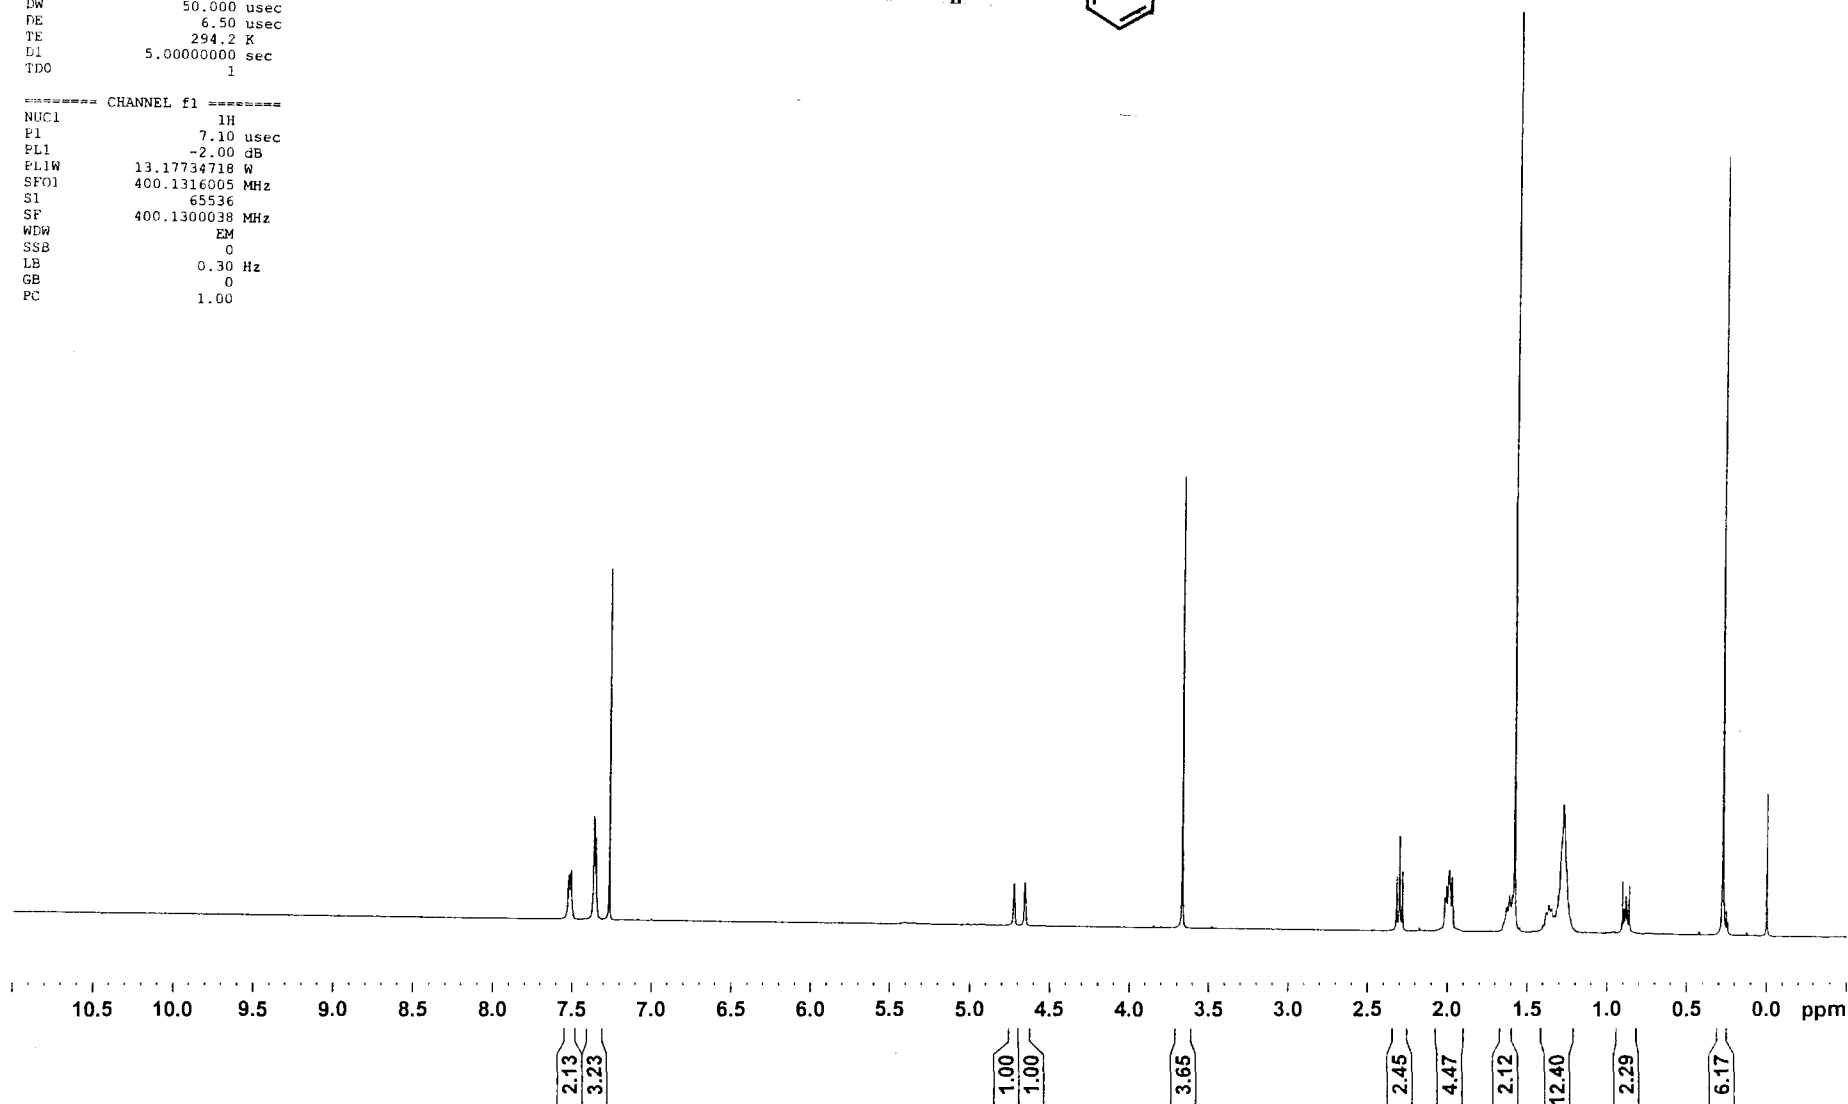

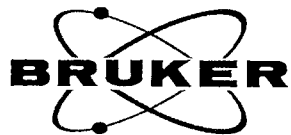

NAME hls-1-247-2-r6670  
EXPNO 2  
PROCNO 1  
Date\_ 20101025  
Time\_ 20.52  
INSTRUM spect  
PROBHD 5 mm PADUL 13C  
PULPROG zgpg30  
TD 65536  
SOLVENT cdc13  
NS 303  
DS 4  
SWH 24038.461 Hz  
FIDRES 0.366798 Hz  
AQ 1.3631988 sec  
RG 203  
DW 20.800 usec  
DE 6.50 usec  
TE 294.9 K  
D1 2.00000000 sec  
D11 0.03000000 sec  
TD0 1

===== CHANNEL f1 =====  
NUC1 13C  
P1 9.68 usec  
PL1 -0.60 dB  
PL1W 41.24164963 W  
SFO1 100.6228298 MHz

===== CHANNEL f2 =====  
CPDPRG2 waltz16  
NUC2 1H  
PCPD2 90.00 usec  
PL2 0.00 dB  
PL12 15.66 dB  
PL13 15.92 dB  
PL2W 8.31434441 W  
PL12W 0.22585411 W  
PL13W 0.21272963 W  
SFO2 400.1316005 MHz  
SI 32768  
SF 100.6127553 MHz  
WDW EM  
SSB 0  
LB 1.00 Hz  
GB 0  
PC 1.40

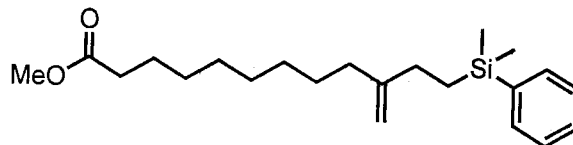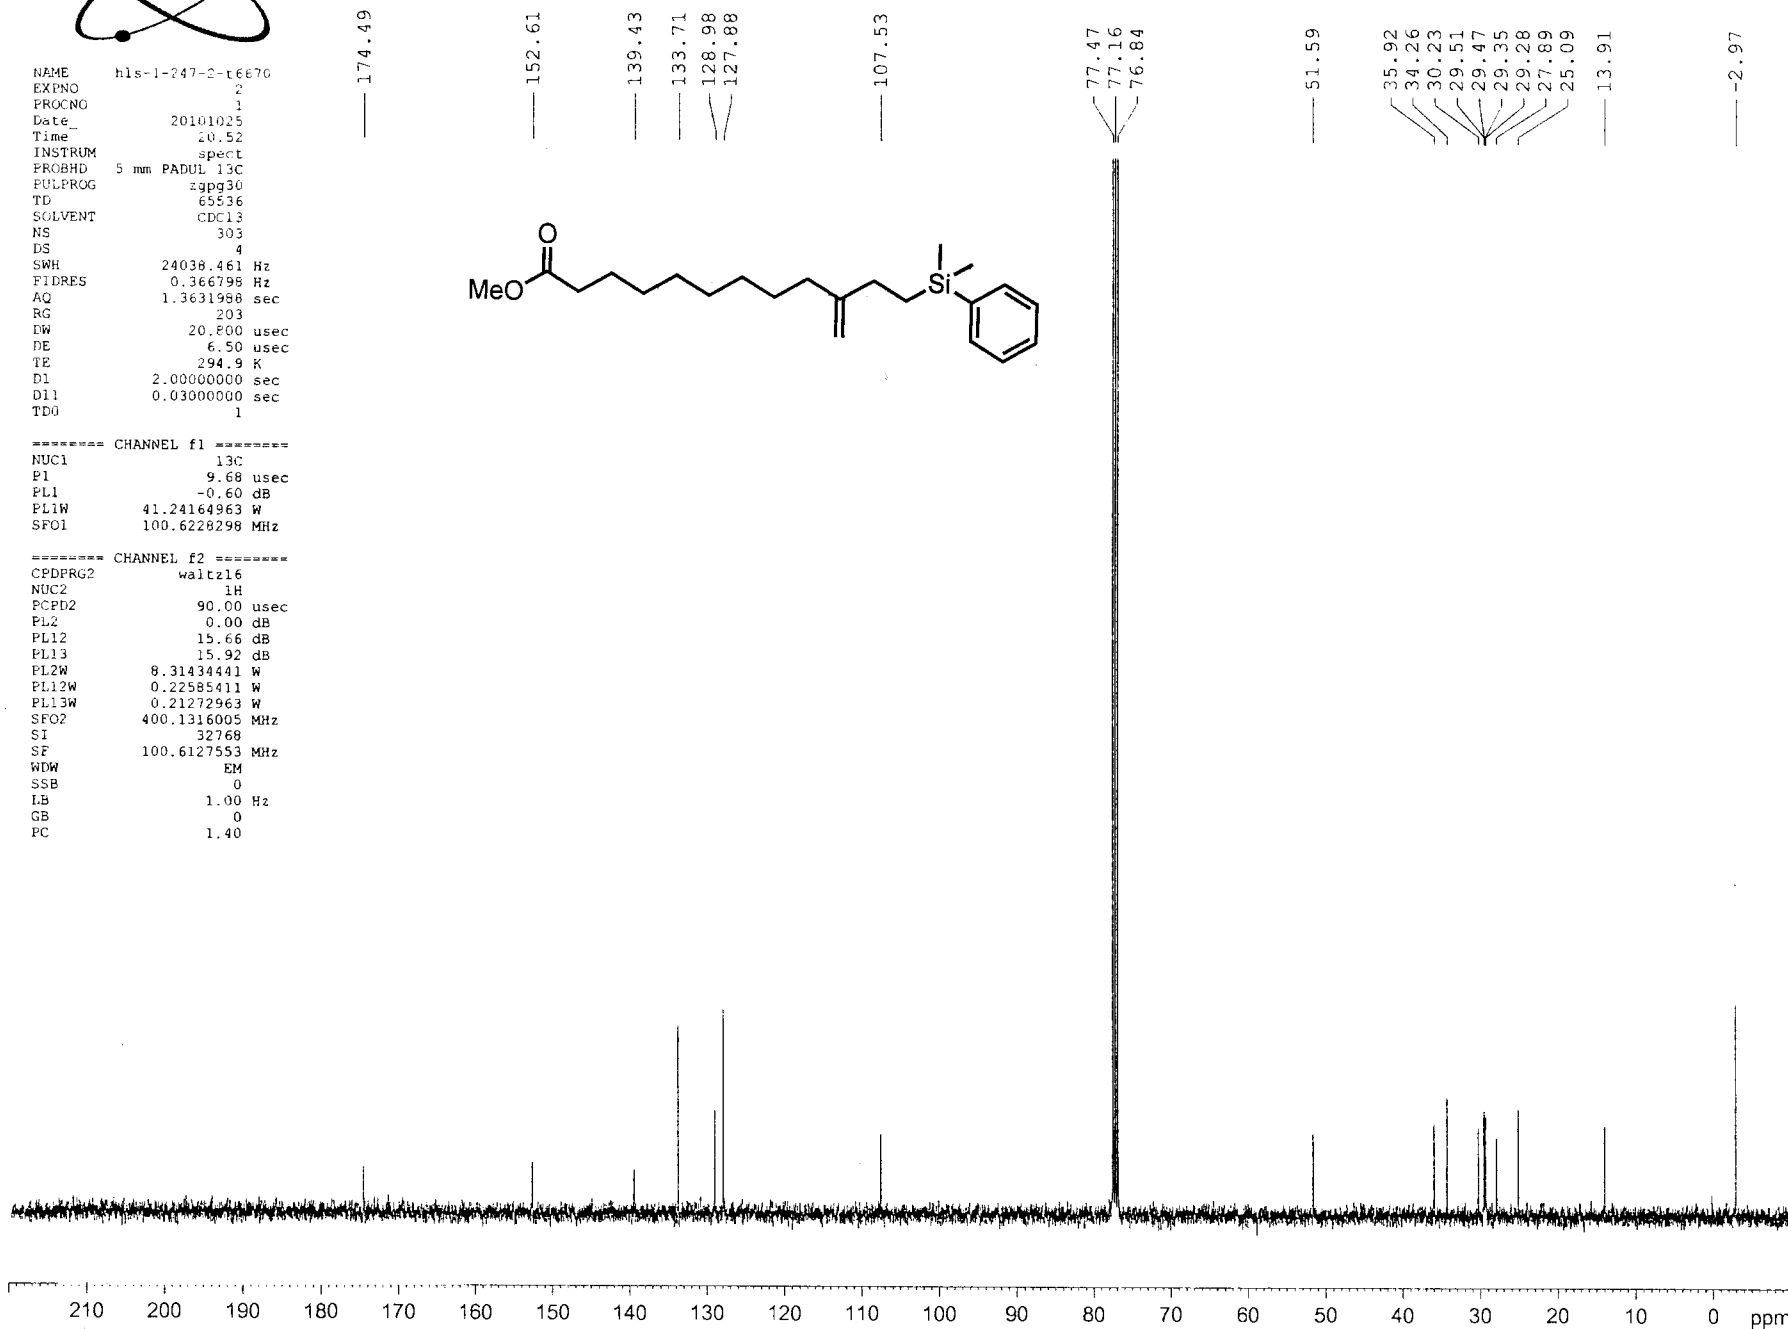



NAME his-2-109-6-t 25  
EXPNO 1  
PROCNO 1  
Date\_ 20110411  
Time 23.34  
INSTRUM spect  
PROBHD 5 mm PABBO BB-  
PULPROG zg30  
TD 65536  
SOLVENT CDCl3  
NS 7  
DS 0  
SWH 8223.685 Hz  
FIDRES 0.125483 Hz  
AQ 3.9846387 sec  
RG 71.8  
DW 60.800 usec  
DE 6.50 usec  
TE 296.3 K  
D1 2.00000000 sec  
TD0 1

----- CHANNEL f1 -----  
NUC1 1H  
P1 14.00 usec  
PL1 -1.00 dB  
PL1W 13.56617069 W  
SFO1 400.1924713 MHz  
SI 32768  
SF 400.1900141 MHz  
WDW EM  
SSB 0  
LB 0.30 Hz  
GB 0  
PC 1.00

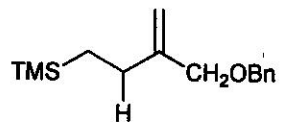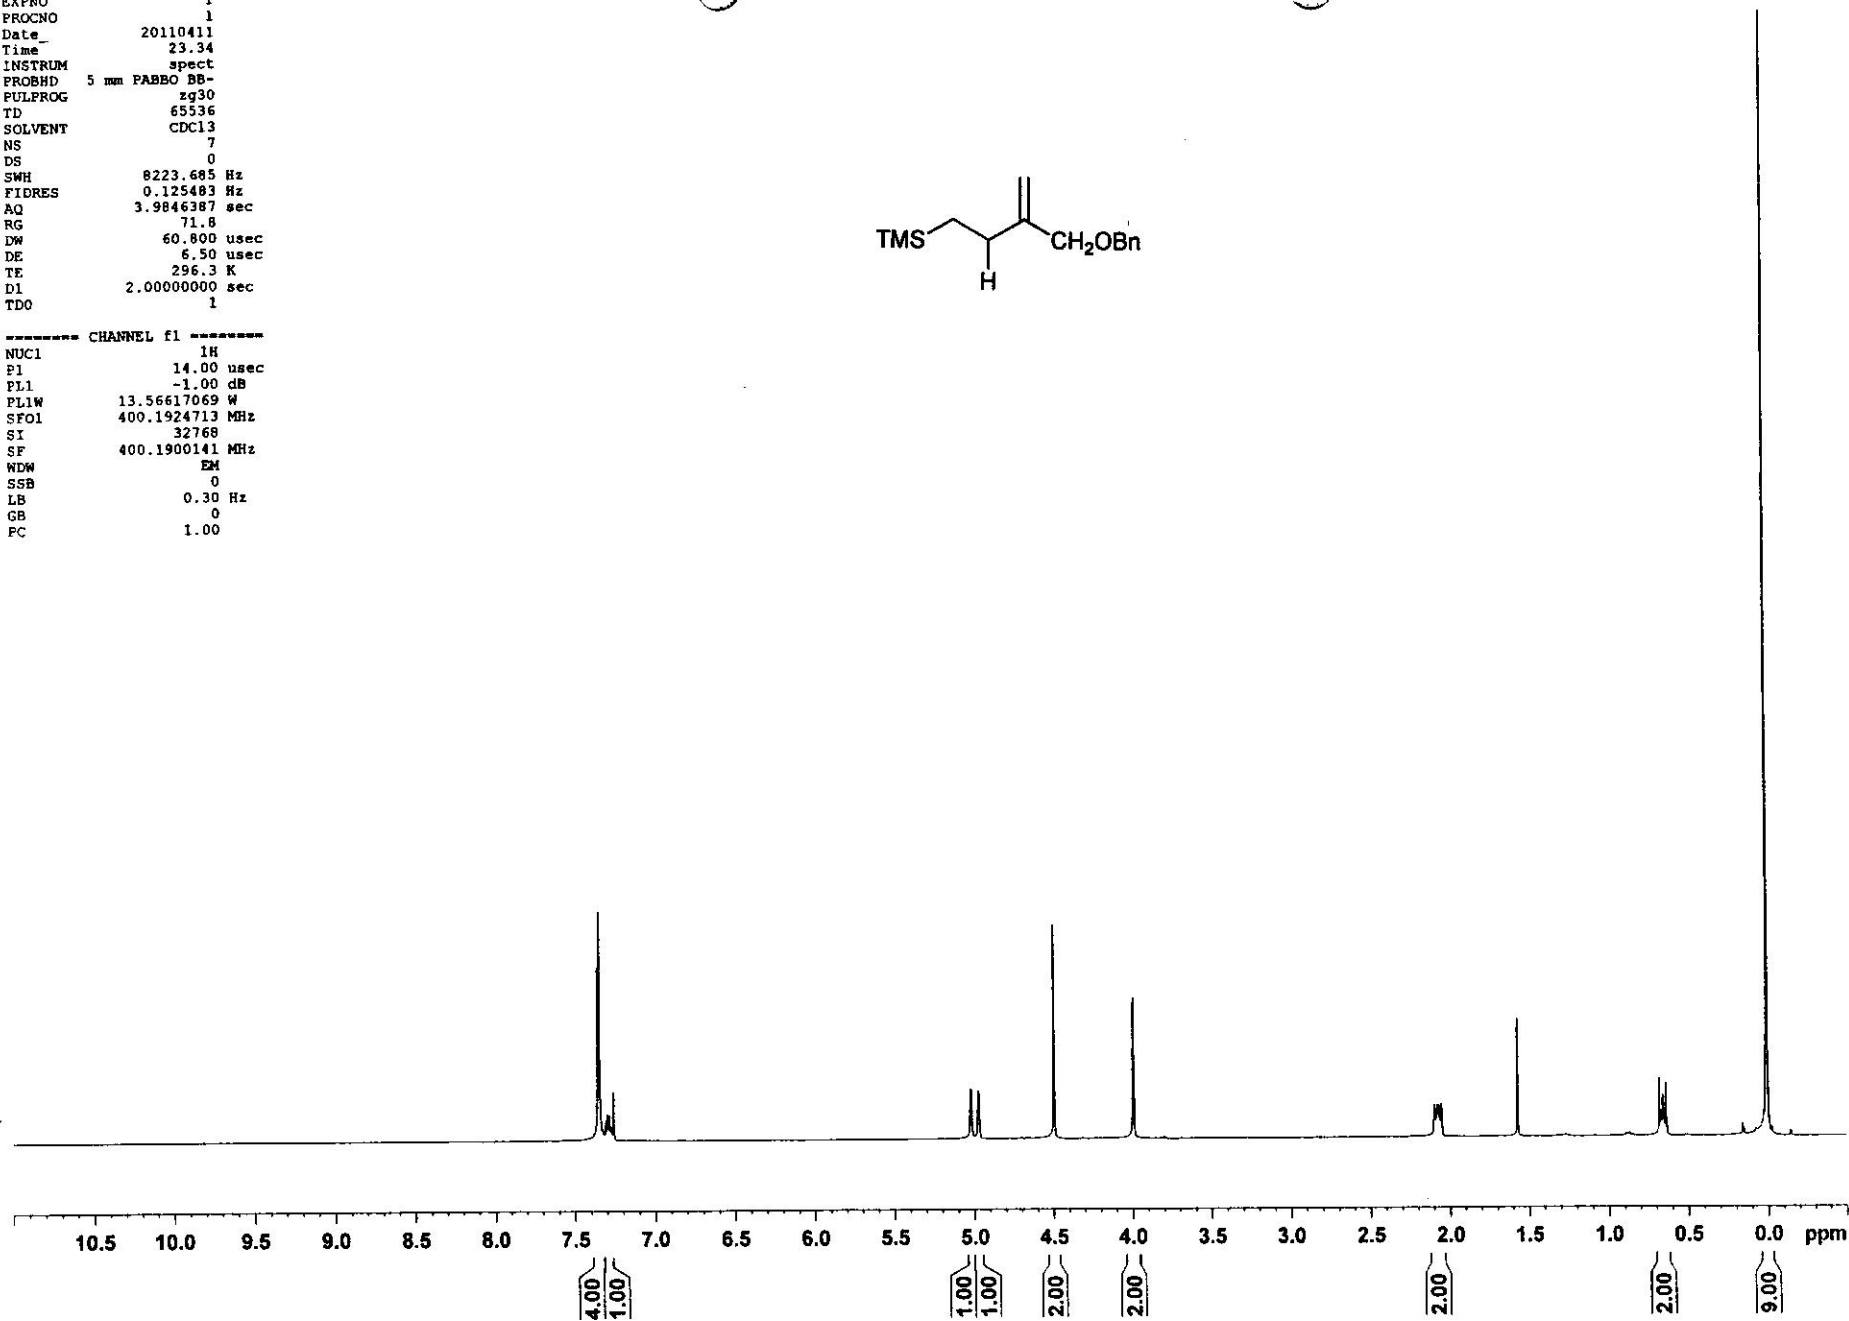

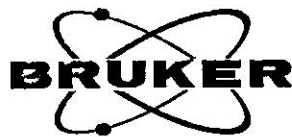

NAME h1s-2-109-6-t 25  
EXPNO 2  
PROCNO 1  
Date\_ 20110411  
Time 23.41  
INSTRUM spect  
PROBHD 5 mm PABBO BB-  
PULPROG zgpg30  
TD 65536  
SOLVENT CDCl3  
NS 93  
DS 4  
SWH 24038.461 Hz  
FIDRES 0.366798 Hz  
AQ 1.3631988 sec  
RG 161  
LW 20.800 usec  
DE 6.50 usec  
TE 296.9 K  
D1 2.00000000 sec  
D11 0.03000000 sec  
TD0 1

----- CHANNEL f1 -----  
NUC1 13C  
P1 9.90 usec  
PL1 -2.00 dB  
PL1W 55.33689499 W  
SFO1 100.6379183 MHz

----- CHANNEL f2 -----  
CPDPRG2 waltz16  
NUC2 1H  
PCPD2 90.00 usec  
PL2 -1.00 dB  
PL12 15.16 dB  
PL13 18.62 dB  
PL12W 13.56617069 W  
PL12W 0.32844096 W  
PL13W 0.14806664 W  
SFO2 400.1916008 MHz  
S1 32768  
SF 100.6278434 MHz  
WDW EM  
SSB 0  
LB 1.00 Hz  
GB 0  
PC 1.40

148.87

138.64

128.50  
127.85  
127.67

110.55

77.48  
77.16  
76.85  
73.11  
72.01

27.46

14.52

-1.62

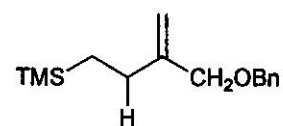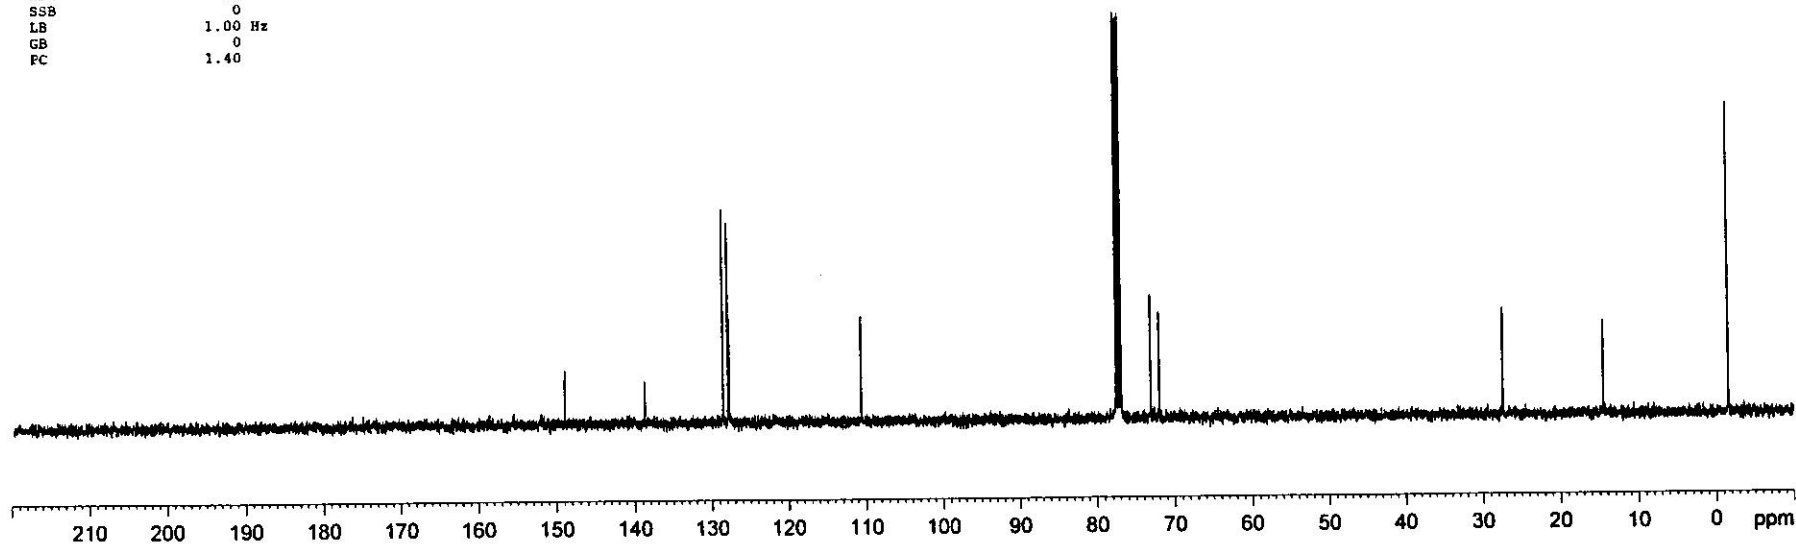

```

NAME      hls-2-27-1b-t25
EXPNO     1
PROCNO    1
Date_     20101013
Time      12.33
INSTRUM   spect
PROBHD    5 mm PABBO BB-
PULPROG   zg30
TD        65536
SOLVENT   CDCl3
NS        4
DS        1
SWH       8223.685 Hz
FIDRES    0.125483 Hz
AQ        3.9846387 sec
RG        90.5
DW        60.900 usec
DE        6.50 usec
TE        298.0 K
D1        5.00000000 sec
TD0       1
  
```

```

===== CHANNEL f1 =====
NUC1      1H
P1        14.00 usec
PL1       -1.00 dB
PL1W      13.56617069 W
SFO1      400.1924713 MHz
SI        32768
SF        400.1900148 MHz
WDW       EM
SSB       0
LB        0.30 Hz
GB        0
PC        1.00
  
```

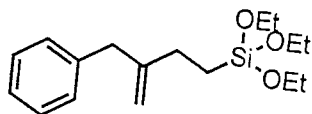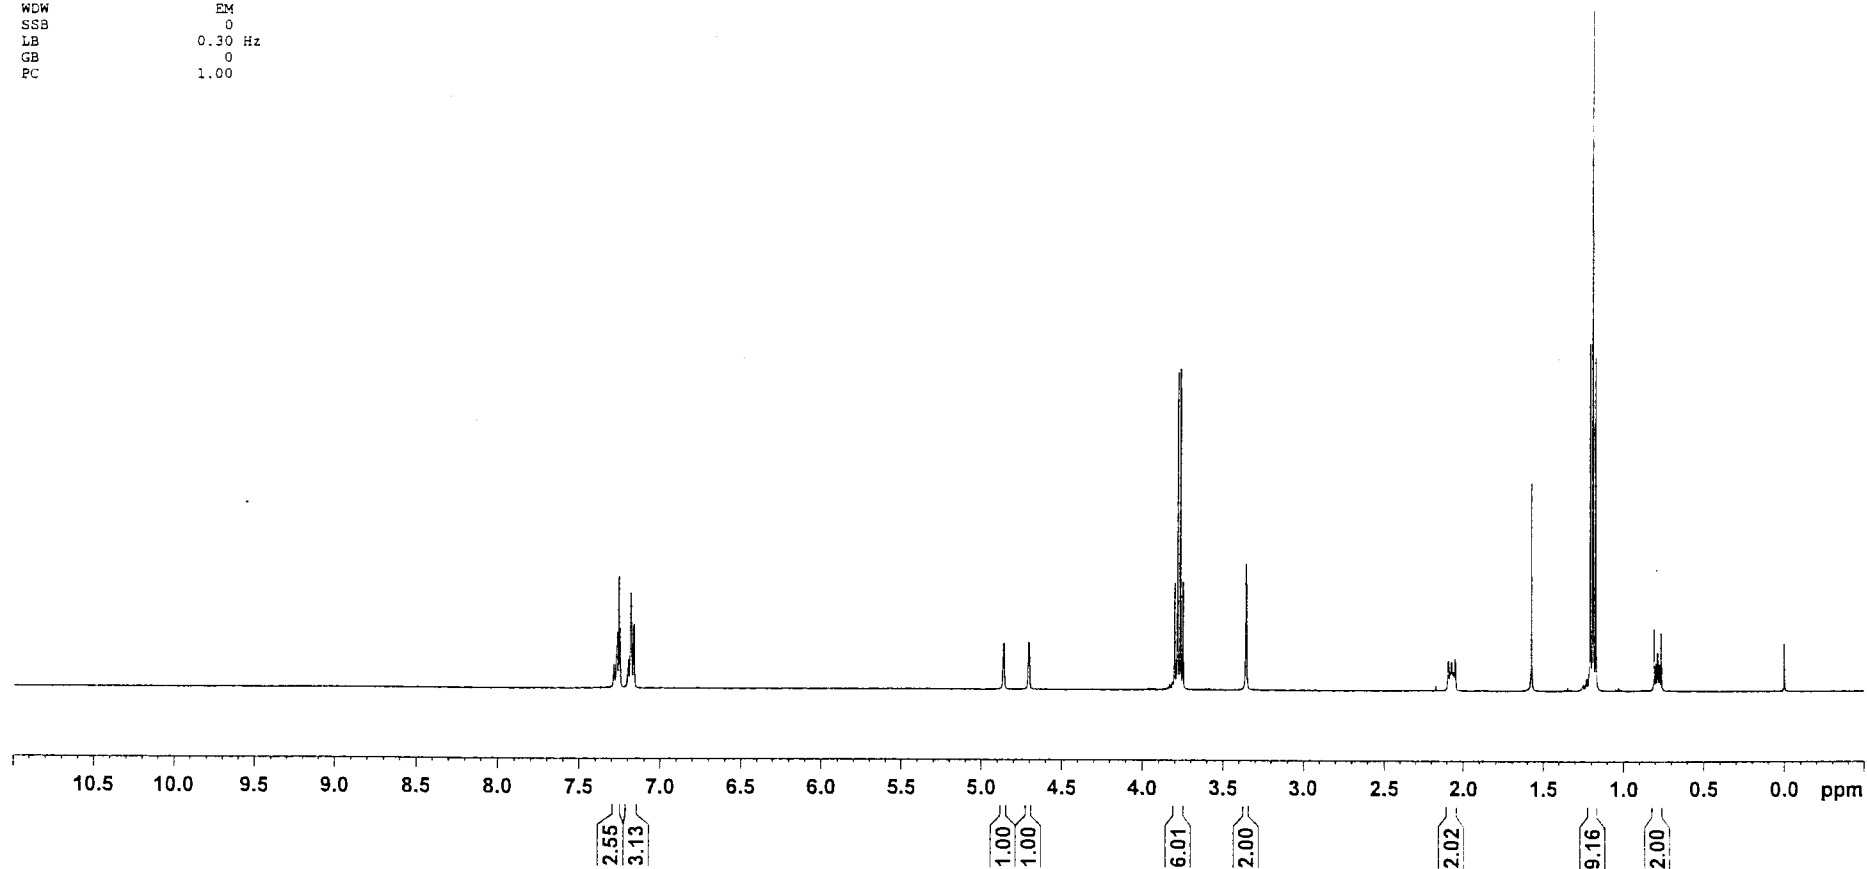

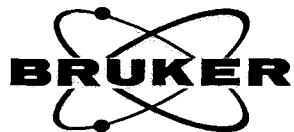

NAME hls-2-27-1b-t25  
EXPNO 2  
PROCNO 1  
Date\_ 20101013  
Time 12.39  
INSTRUM spect  
PROBHD 5 mm PABBO BB-  
PULPROG zgpg30  
TD 65536  
SOLVENT CDCl3  
NS 70  
DS 4  
SWH 24038.461 Hz  
FIDRES 0.366798 Hz  
AQ 1.3631988 sec  
RG 181  
DW 20.800 usec  
DE 6.50 usec  
TE 298.6 K  
D1 2.00000000 sec  
D11 0.03000000 sec  
TD0 1

===== CHANNEL f1 =====  
NUC1 13C  
P1 9.90 usec  
PL1 -2.00 dB  
PL1W 55.33689499 W  
SFO1 100.6379183 MHz

===== CHANNEL f2 =====  
CPDPRG2 waltz16  
NUC2 1H  
PCPD2 90.00 usec  
PL2 -1.00 dB  
PL12 15.16 dB  
PL13 18.62 dB  
PL2W 13.56617069 W  
PL12W 0.32844096 W  
PL13W 0.14806664 W  
SFO2 400.1916008 MHz  
SI 32768  
SF 100.6278427 MHz  
WDW EM  
SSB 0  
LB 1.00 Hz  
GB 0  
PC 1.40

151.18  
139.94  
129.16  
128.38  
126.13  
110.13  
77.48  
77.16  
76.84  
58.50  
42.88  
28.51  
18.40  
8.77

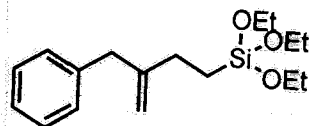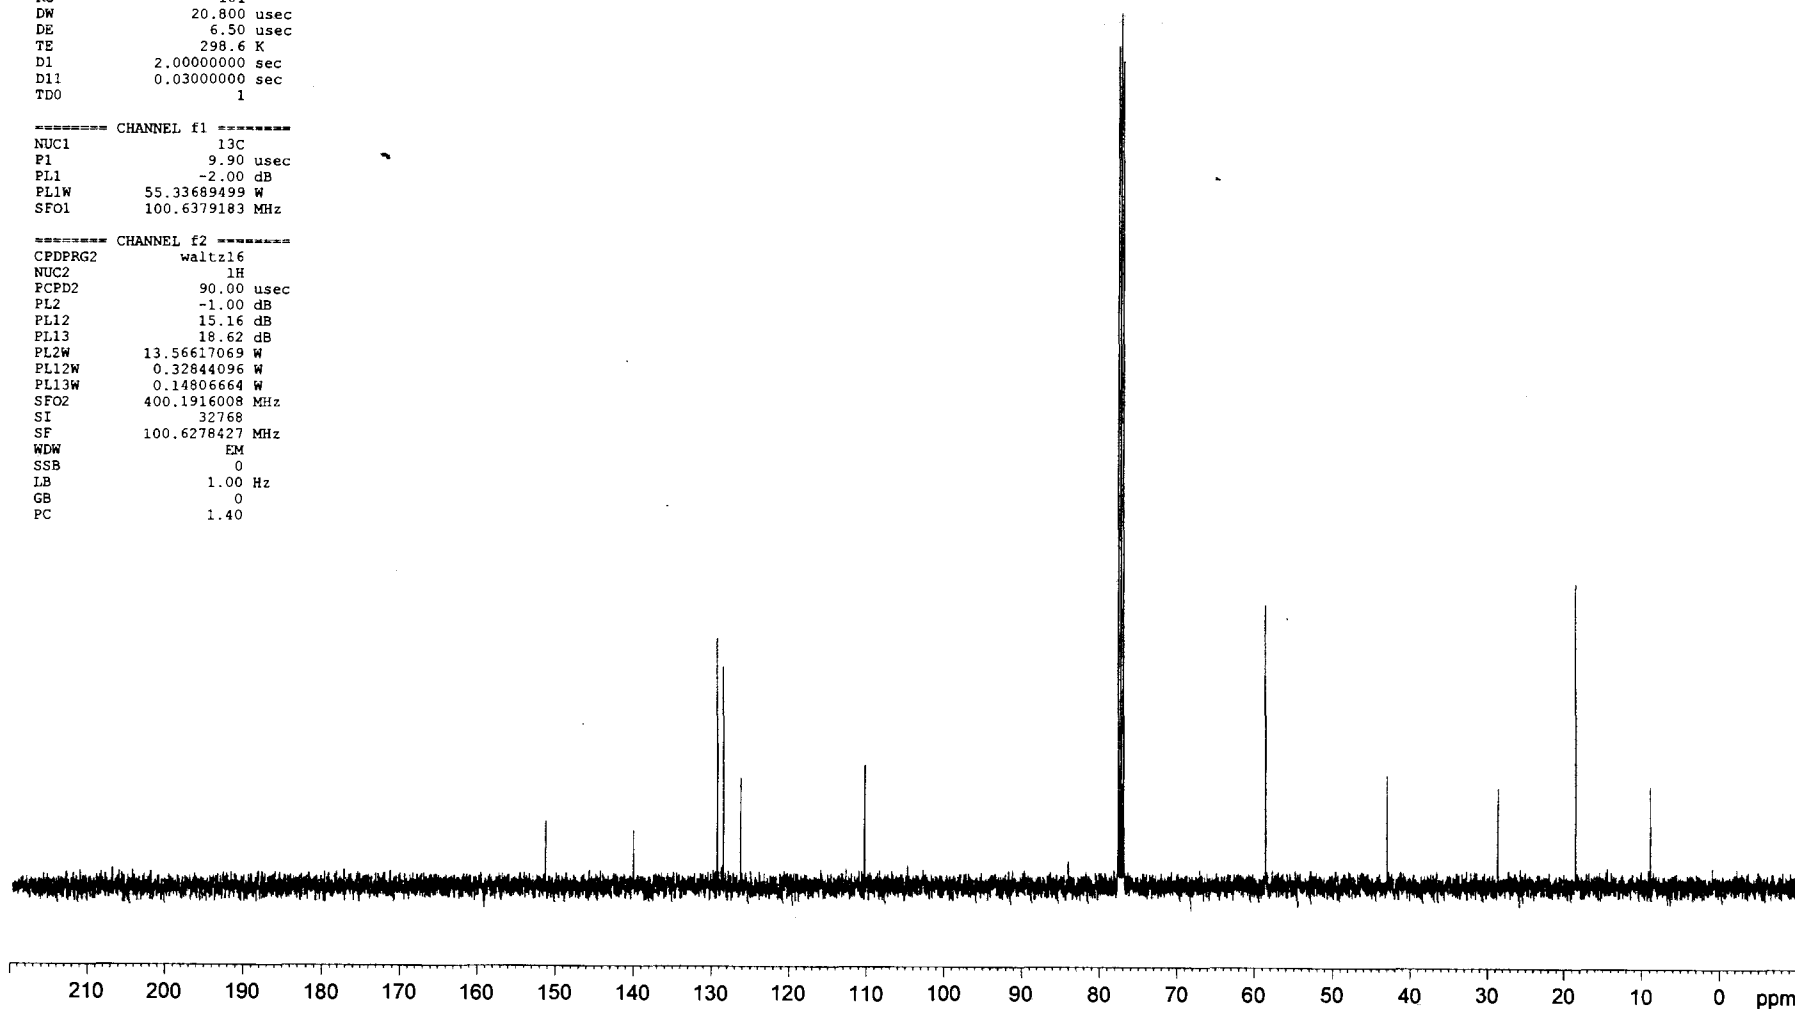

NAME hls-2-24-3-t29  
EXPNO 1  
PROCNO 1  
Date\_ 20101018  
Time 17.48  
INSTRUM spect  
PROBHD 5 mm PABBO BB-  
PULPROG zg30  
TD 65536  
SOLVENT CDCl3  
NS 3  
DS 2  
SWH 8223.685 Hz  
FIDRES 0.125483 Hz  
AQ 3.9846387 sec  
RG 45.2  
DW 60.800 usec  
DE 6.50 usec  
TE 298.7 K  
D1 5.00000000 sec  
TD0 1

===== CHANNEL f1 =====  
NUC1 1H  
P1 14.00 usec  
PL1 -1.00 dB  
PL1W 13.56617069 W  
SF01 400.1924713 MHz  
SI 32768  
SF 400.1900248 MHz  
WDW EM  
SSB 0  
LB 0.30 Hz  
GB 0  
PC 1.00

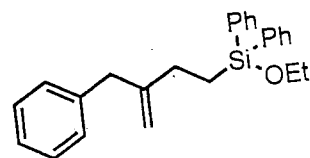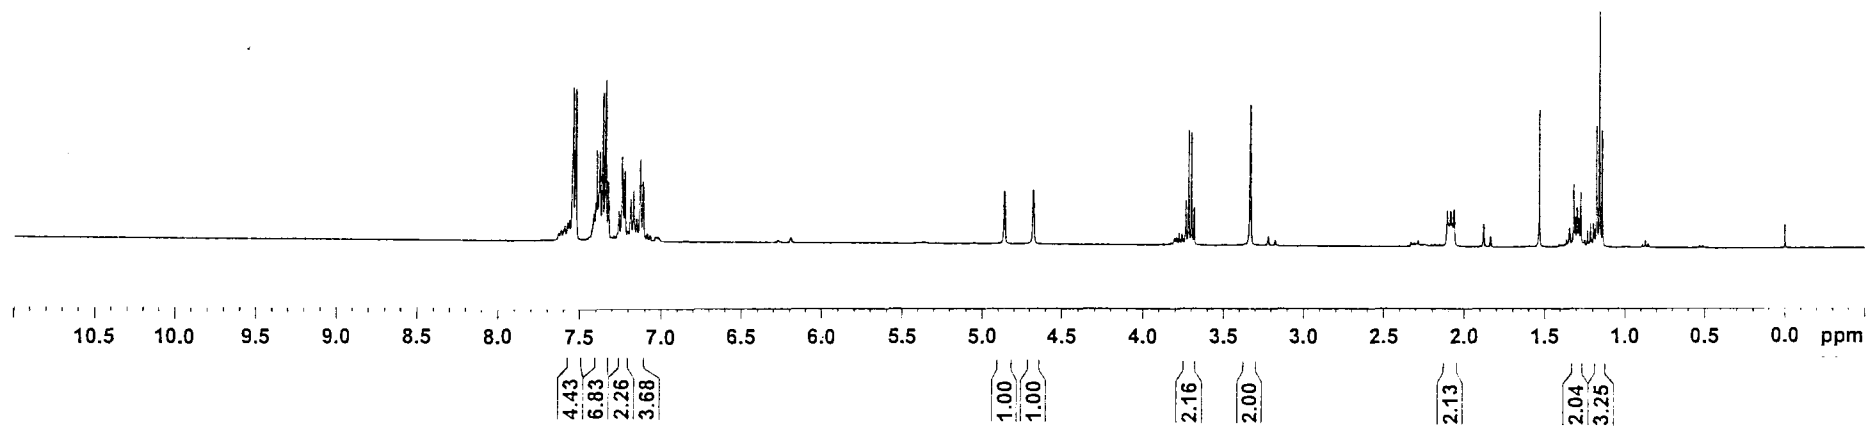

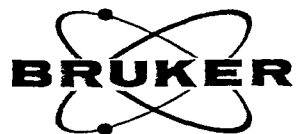

NAME hls-2-24-3-t29  
EXPNO 2  
PROCNO 1  
Date\_ 20101018  
Time 18.45  
INSTRUM spect  
PROBHD 5 mm PABBO BB-  
PULPROG zgpg30  
TD 65536  
SOLVENT CDCl3  
NS 41  
DS 4  
SWH 24038.461 Hz  
FIDRES 0.366798 Hz  
AQ 1.3631988 sec  
RG 161  
DW 20.800 usec  
DE 6.50 usec  
TE 298.9 K  
D1 2.00000000 sec  
D11 0.03000000 sec  
TD0 1

----- CHANNEL f1 -----  
NUC1 13C  
P1 9.90 usec  
PL1 -2.00 dB  
PL1W 55.33689499 W  
SFO1 100.6379183 MHz

----- CHANNEL f2 -----  
CPDPRG2 waltz16  
NUC2 1H  
PCPD2 90.00 usec  
PL2 -1.00 dB  
PL12 15.16 dB  
PL13 18.62 dB  
PL2W 13.56617069 W  
PL12W 0.32844096 W  
PL13W 0.14806664 W  
SFO2 400.1916008 MHz  
SI 32768  
SF 100.6278452 MHz  
WDW EM  
SSB 0  
LB 1.00 Hz  
GB 0  
PC 1.40

151.40  
139.85  
135.12  
134.77  
129.93  
129.18  
128.37  
127.98  
126.12  
110.24  
77.48  
77.16  
76.84  
59.41  
42.74  
28.89  
18.50  
12.33

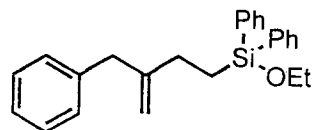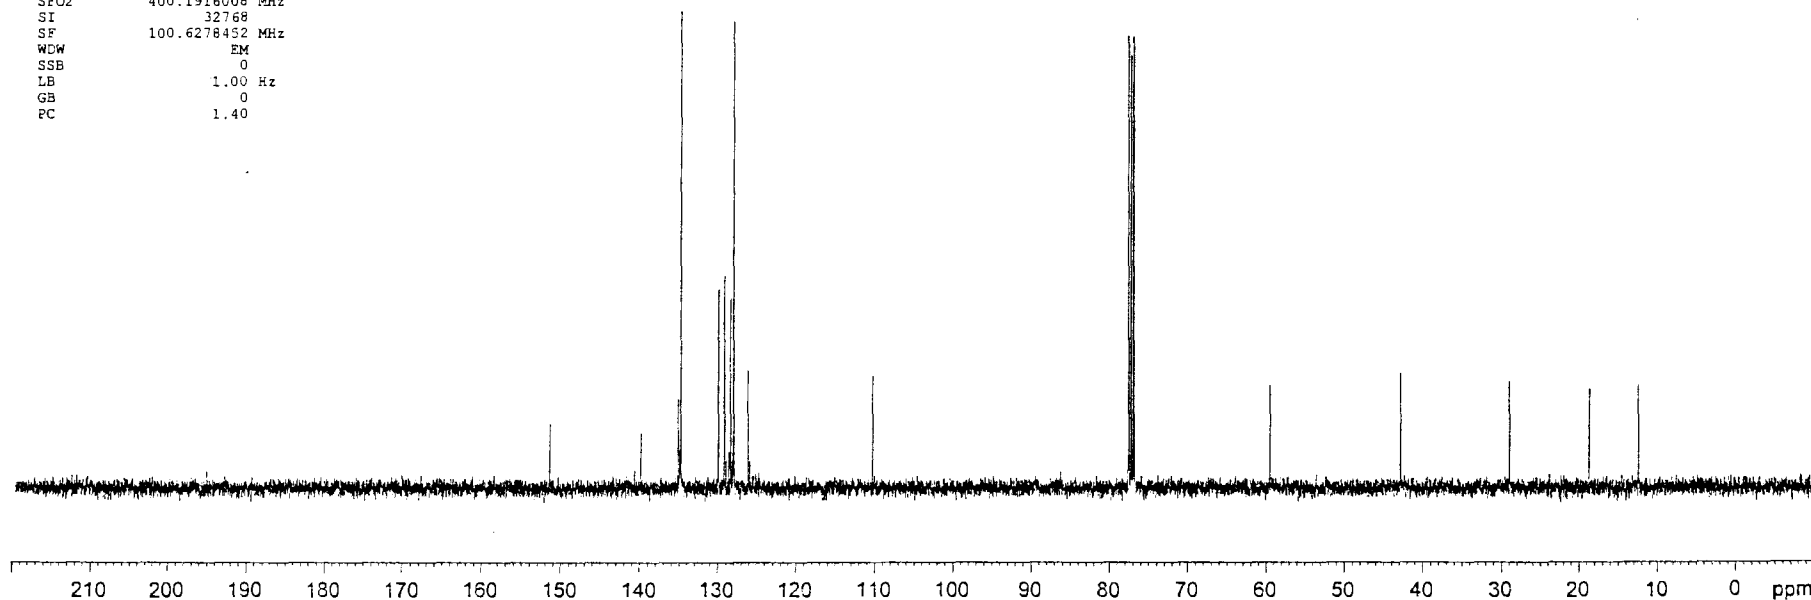



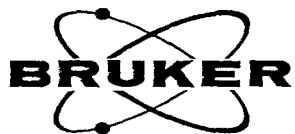

NAME hls-2-26 3c t12  
EXPNO 2  
PROCNO 1  
Date\_ 20101011  
Time 13.19  
INSTRUM spect  
PROBHD 5 mm PABBO BB-  
PULPROG zgpg30  
TD 65536  
SOLVENT CDCl3  
NS 154  
DS 4  
SWH 24038.461 Hz  
FIDRES 0.366798 Hz  
AQ 1.3631988 sec  
RG 228  
DW 20.800 usec  
DE 6.50 usec  
TE 299.1 K  
D1 2.00000000 sec  
D11 0.03000000 sec  
TDO 1

----- CHANNEL f1 -----  
NUC1 13C  
P1 9.90 usec  
PL1 -2.00 dB  
PL1W 55.33689499 W  
SFO1 100.6379183 MHz

----- CHANNEL f2 -----  
CPDPRG2 waltz16  
NUC2 1H  
PCPD2 90.00 usec  
PL2 -1.00 dB  
PL12 15.16 dB  
PL13 18.62 dB  
PL2W 13.56617069 W  
PL12W 0.32844096 W  
PL13W 0.14806664 W  
SFO2 400.1916008 MHz  
SI 32768  
SF 100.6278427 MHz  
WDW EM  
SSB 0  
LB 1.00 Hz  
GB 0  
PC 1.40

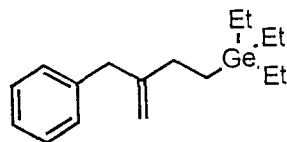

152.18  
140.08  
129.17  
128.37  
126.11  
109.97  
77.47  
77.16  
76.84  
42.72  
31.06  
9.81  
9.08  
3.96

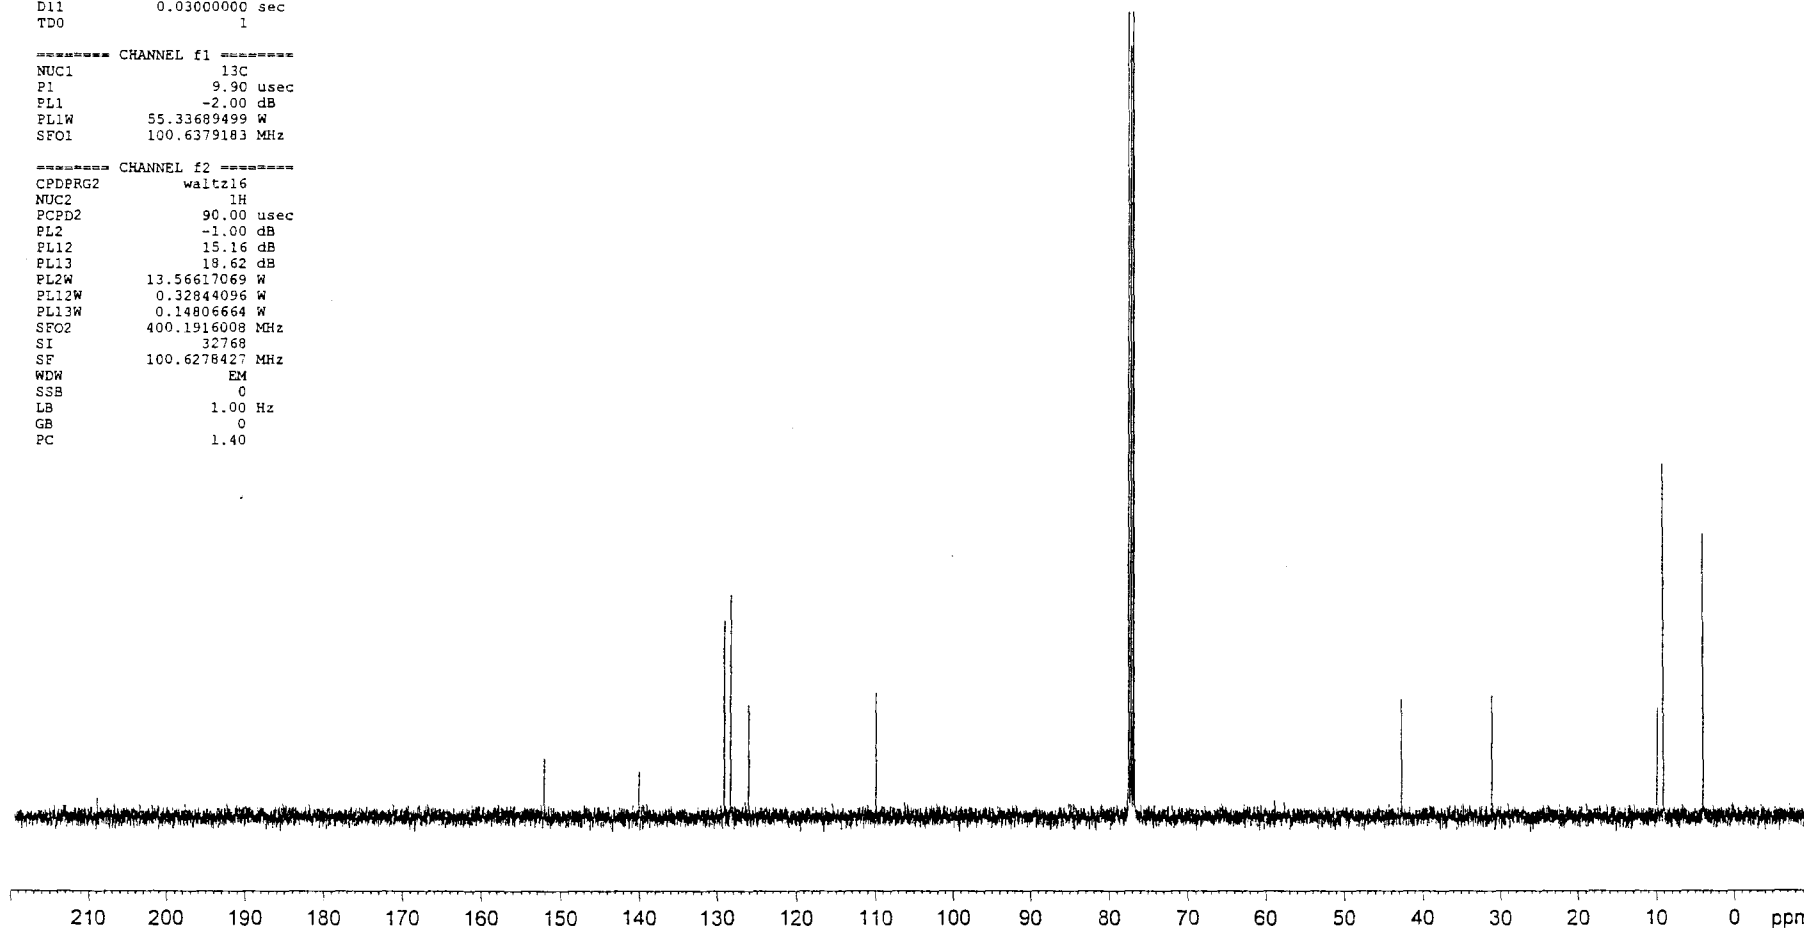



NAME his-2-OMehomo  
EXPNO 1  
PROCNO 1  
Date\_ 20101025  
Time\_ 21.11  
INSTRUM spect  
PROBHD 5 mm PADUL 13C  
PULPROG zg30  
TD 65536  
SOLVENT CDCl3  
NS 6  
DS 0  
SWH 10000.000 Hz  
FIDRES 0.152588 Hz  
AQ 3.2768500 sec  
RG 203  
DW 50.000 usec  
DE 6.50 usec  
TE 294.6 K  
F1 5.00000000 sec  
TD0 1

===== CHANNEL f1 =====  
NUC1 1H  
P1 14.83 usec  
PL1 0.00 dB  
PL1W 8.31434441 W  
SFO1 400.1316005 MHz  
SI 65536  
SF 400.1300674 MHz  
WDW EM  
SSB 0  
LB 0.30 Hz  
GB 0  
PC 1.00

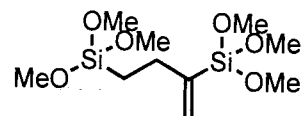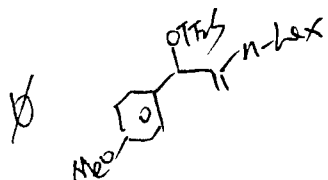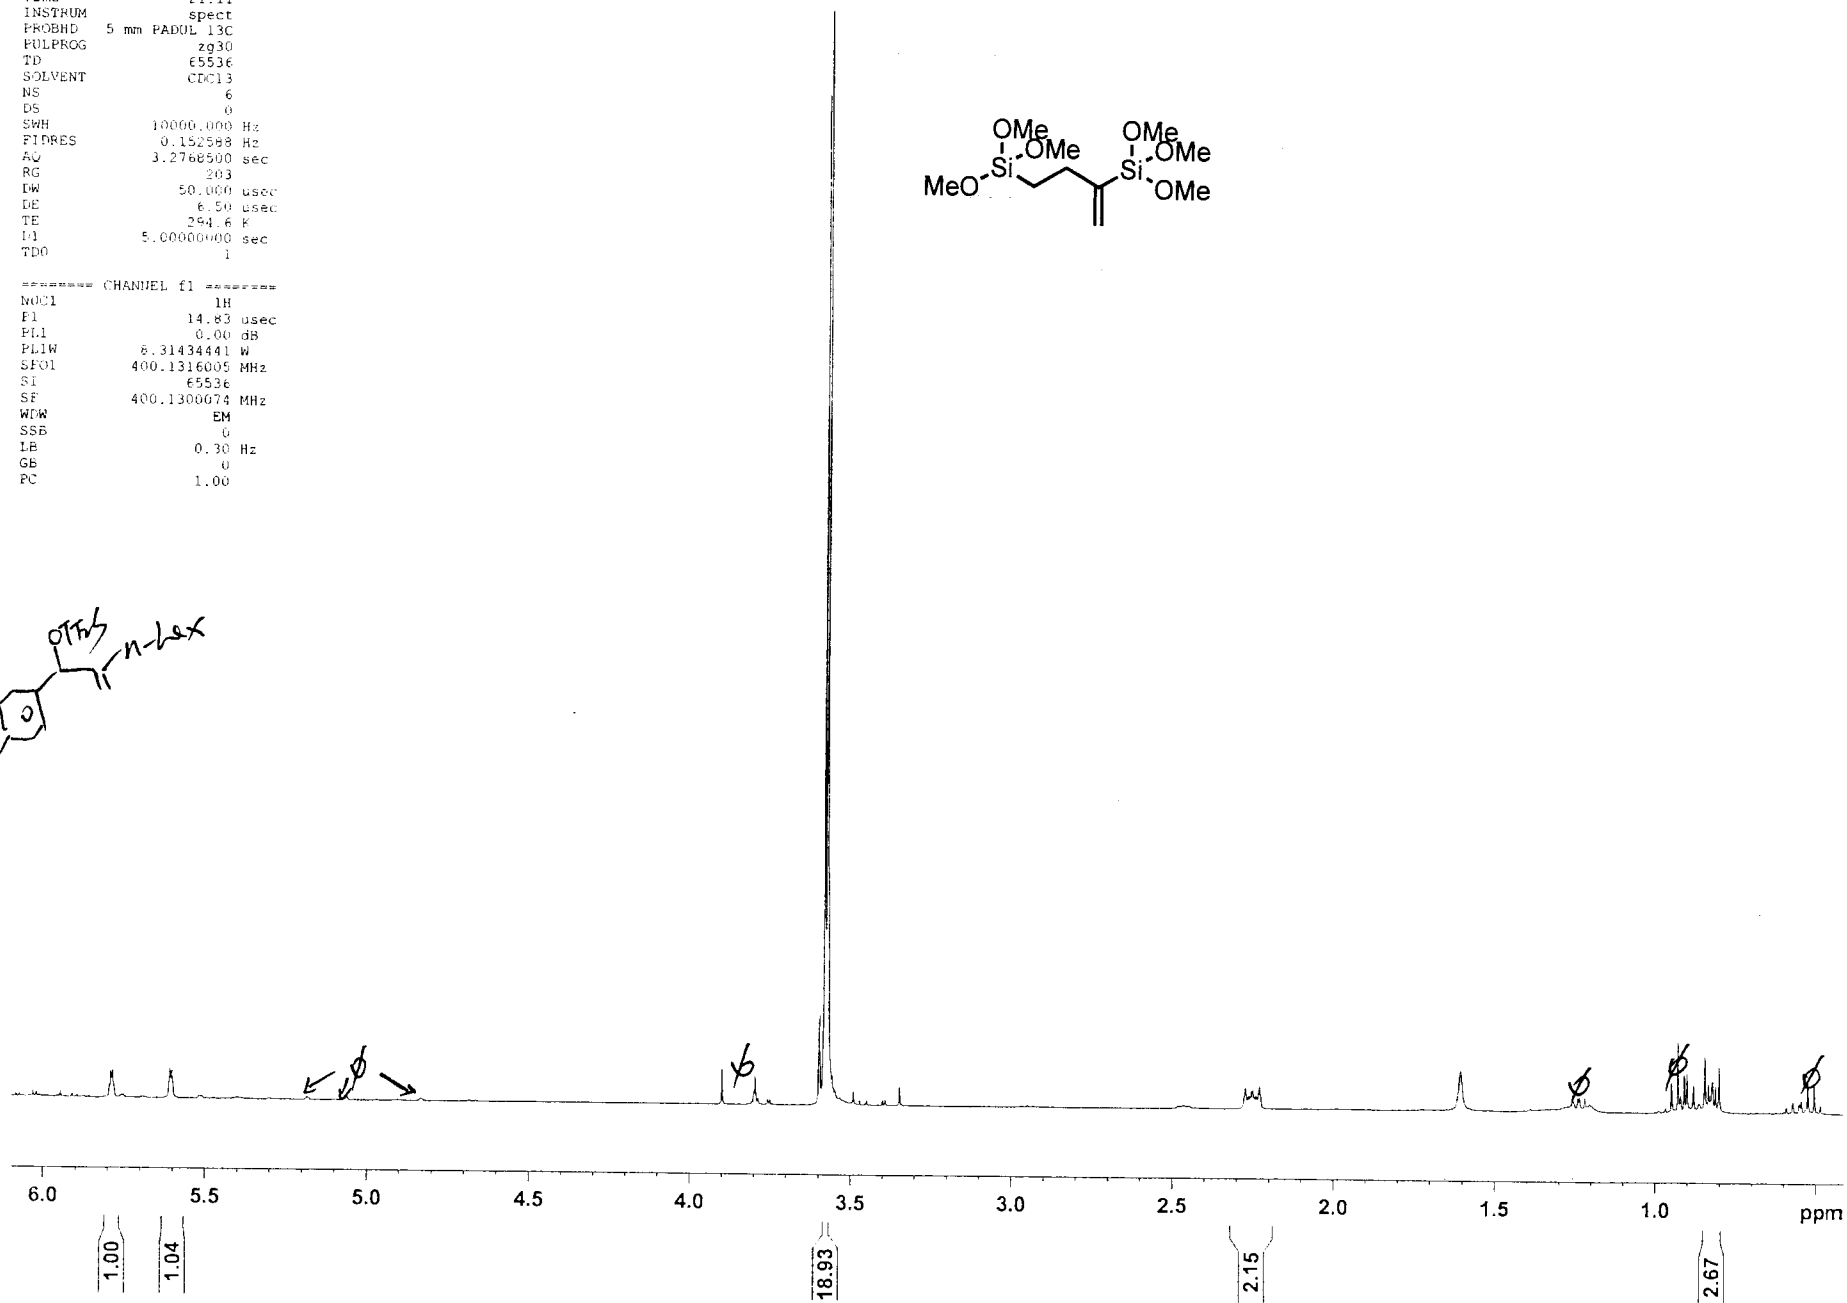

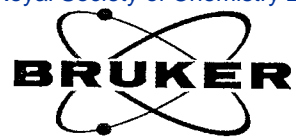

NAME hls-2-OMehomo  
EXPNO 2  
PROCNO 1  
Date\_ 20101025  
Time\_ 21.13  
INSTRUM spect  
PROBHD 5 mm PADUL 13C  
PULPROG zgpg30  
TD 65536  
SOLVENT CDCl3  
NS 217  
DS 4  
SWH 24038.461 Hz  
FIDRES 0.366798 Hz  
AQ 1.3631988 sec  
RG 203  
DW 20.800 usec  
DE 6.50 usec  
TE 294.6 K  
D1 2.00000000 sec  
B11 0.03000000 sec  
TD0 1

===== CHANNEL f1 =====  
NUC1 13C  
P1 9.68 usec  
PL1 -0.60 dB  
PL1W 41.24164963 W  
SFO1 100.6228298 MHz

===== CHANNEL f2 =====  
CPDPRG2 waltz16  
NUC2 1H  
PCPD2 90.00 usec  
PL2 0.00 dB  
PL12 15.66 dB  
PL13 15.92 dB  
PL2W 8.31434441 W  
PL12W 0.22585411 W  
PL13W 0.21272963 W  
SFO2 400.1316005 MHz  
S1 32766  
SF 100.6137546 MHz  
WDW EM  
SSB 0  
LB 1.00 Hz  
GB 0  
PC 1.40

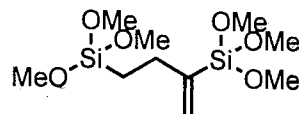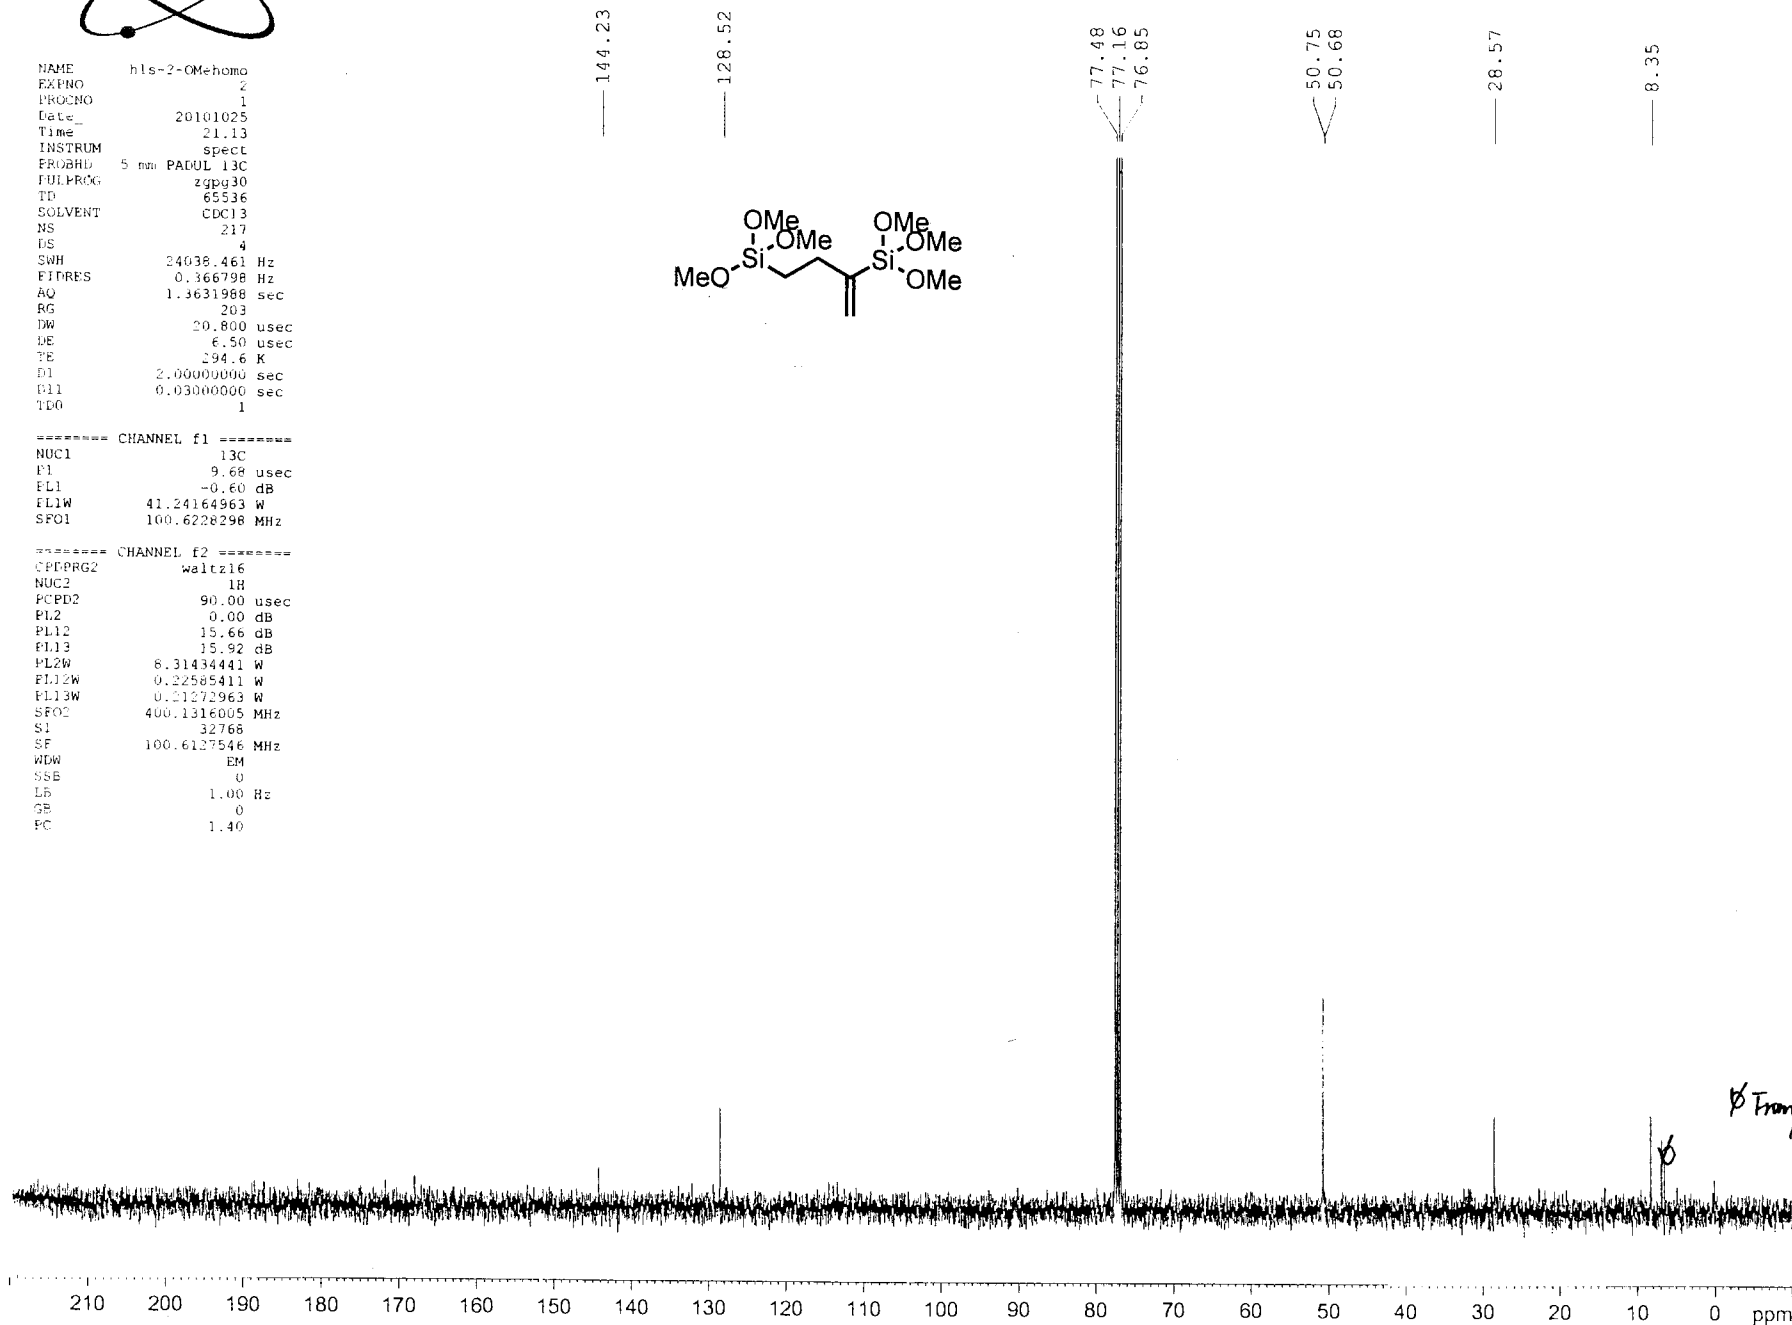

NAME his-2-26-7a-fior2  
EXPNO 1  
PROCNO 1  
Date\_ 20101006  
Time\_ 22.18  
INSTRUM spect  
PROBHD 5 mm PABBI 1H/  
PULPROG zg30  
TD 65536  
SOLVENT CDC13  
NS 5  
DS 0  
SWH 10000.000 Hz  
FIDRES 0.152588 Hz  
AQ 3.2768500 sec  
RG 161  
RW 50.000 usec  
DE 6.50 usec  
TE 294.6 K  
D1 5.00000000 sec  
TD0 1

===== CHANNEL f1 =====  
NUC1 1H  
P1 7.10 usec  
PL1 -2.00 dB  
PL1W 15.17734718 W  
SFO1 400.1316005 MHz  
SI 65536  
SF 400.1300032 MHz  
W1W EM  
SSB 0  
LB 0.30 Hz  
GB 0  
PC 1.00

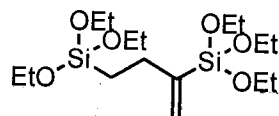

$\phi$  oxidized IPr

JACS, 2008, 130, 12586

pdt assigned by comparison with

ref: JACS, 2005, 127, 17644

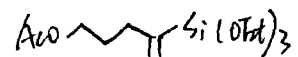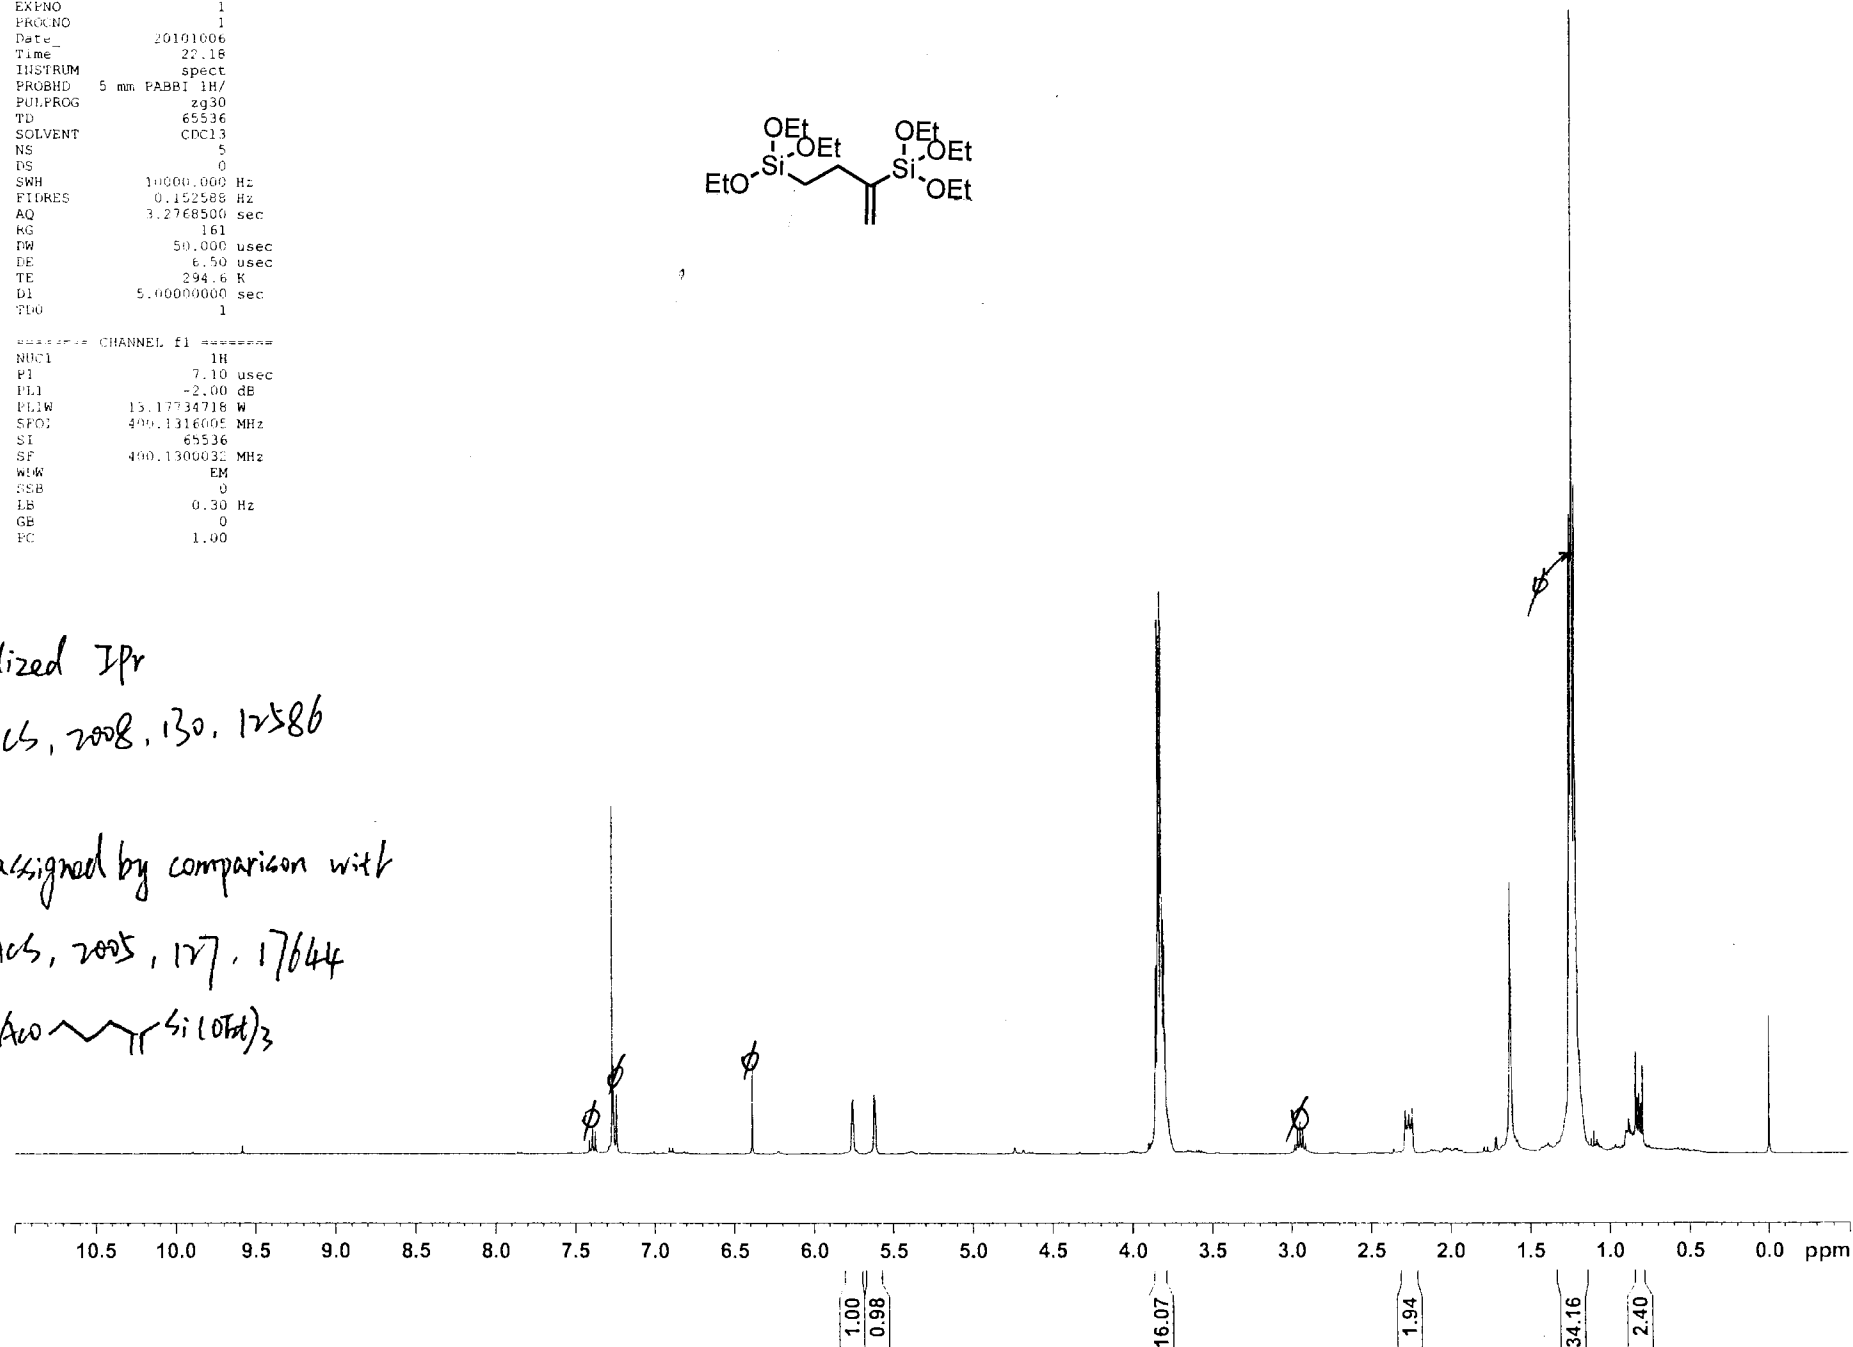

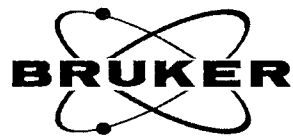

NAME hls-2-26-7a-flor2  
EXPNO 2  
PROCNO 1  
Date\_ 20101025  
Time\_ 22.06  
INSTRUM spect  
PROBHD 5 mm PADUL 13C  
PULPROG zgpg30  
TD 65536  
SOLVENT CDCl3  
NS 164  
DS 4  
SWH 24038.461 Hz  
FIDRES 0.366798 Hz  
AQ 1.3631988 sec  
RG 203  
DW 20.800 usec  
DE 6.50 usec  
TE 294.8 K  
D1 2.00000000 sec  
D11 0.03000000 sec  
TD0 1

===== CHANNEL f1 =====  
NUC1 13C  
P1 9.68 usec  
PL1 -0.60 dB  
PL1W 41.24164963 W  
SFO1 100.6228298 MHz

===== CHANNEL f2 =====  
CPDPRG2 waltz16  
NUC2 1H  
PCPD2 90.00 usec  
PL2 0.00 dB  
PL12 15.66 dB  
PL13 15.92 dB  
PL2W 8.31434441 W  
PL12W 0.22585411 W  
PL13W 0.21272963 W  
SFO2 400.1316005 MHz  
S1 32768  
SF 100.6127546 MHz  
WDW EM  
SSB 0  
LB 1.00 Hz  
GB 0  
PC 1.40

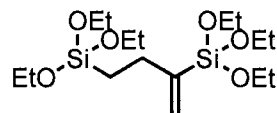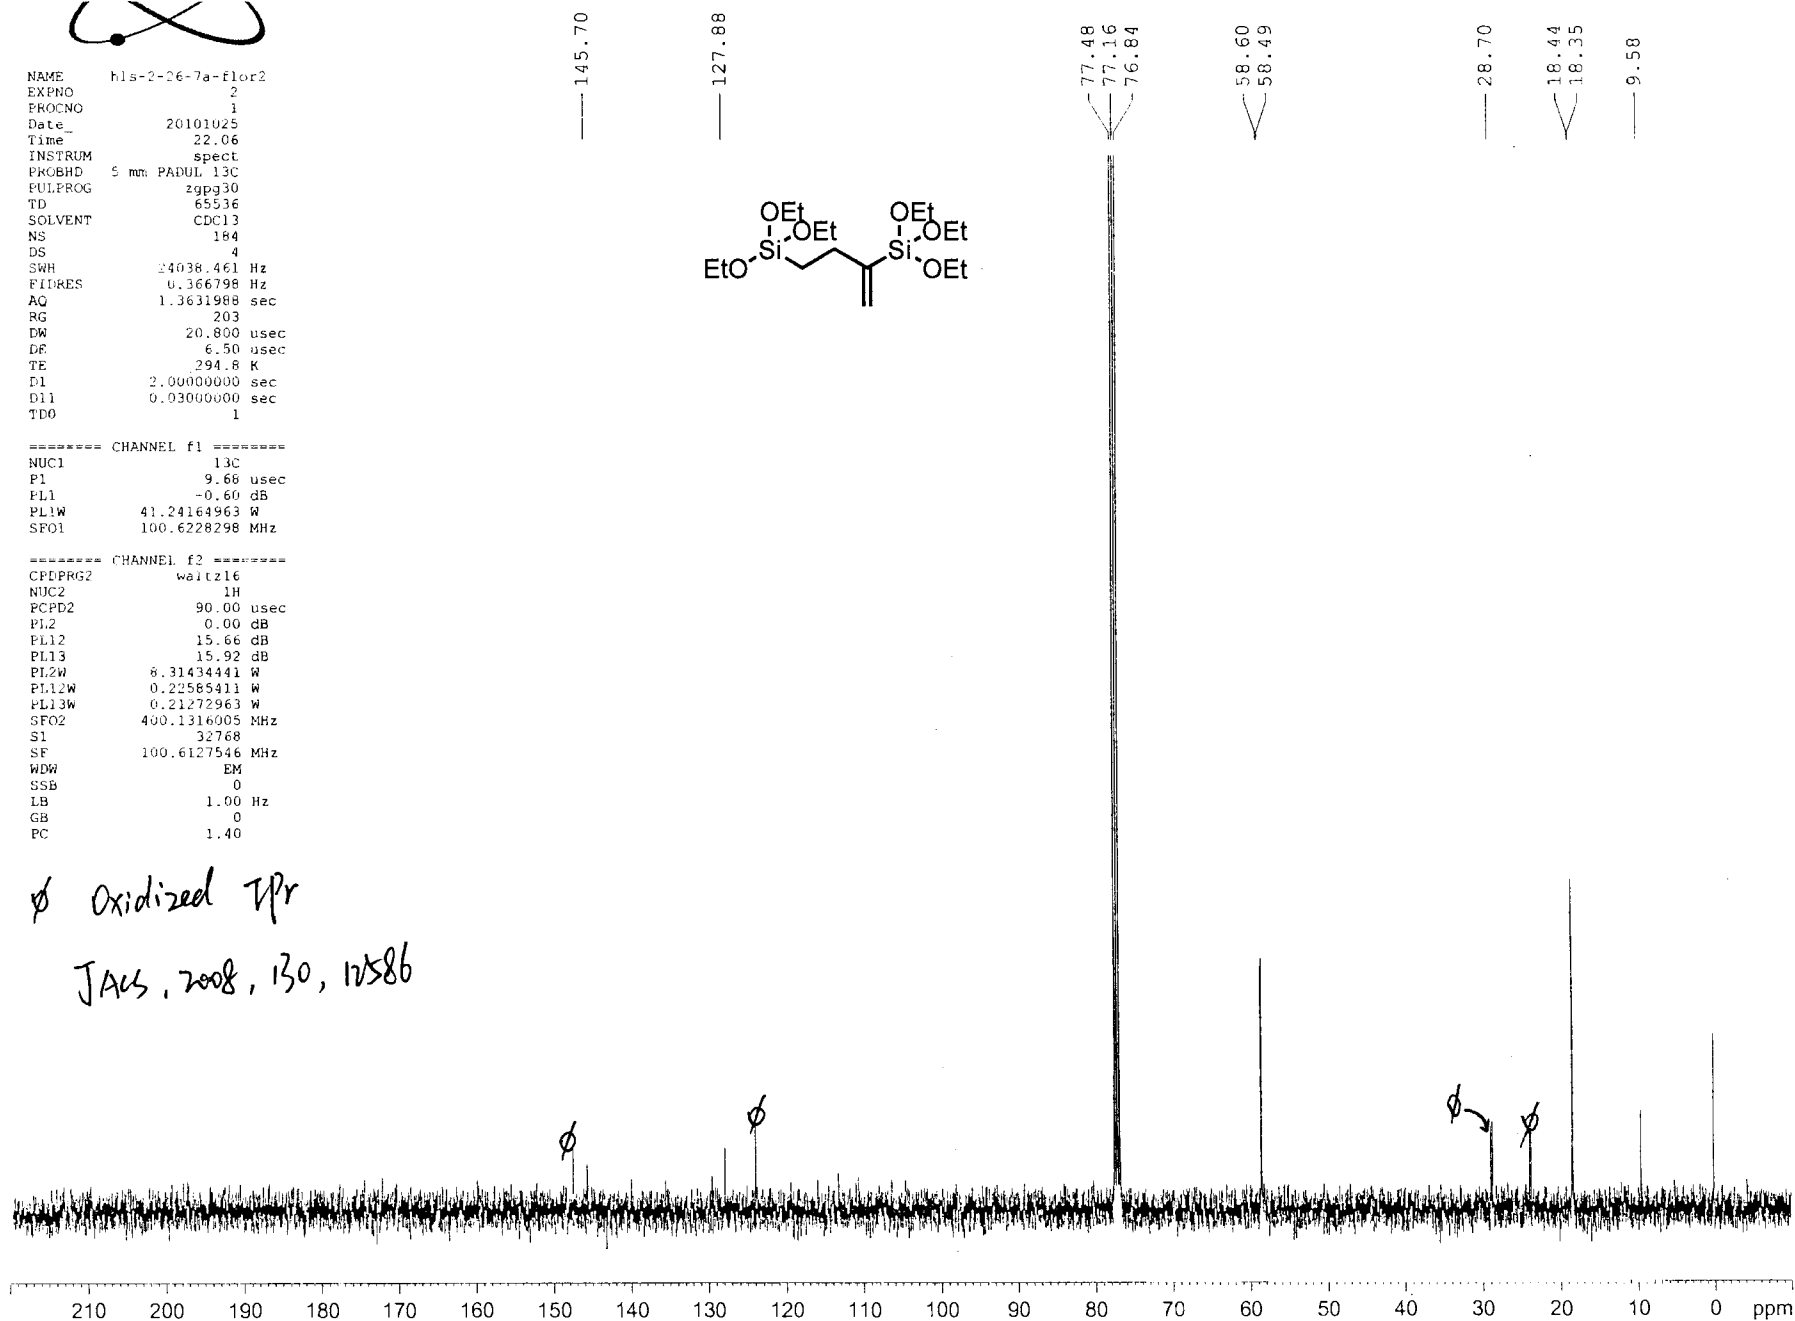

NAME hls-2-OMe2homo  
EXPNO 1  
PROCNO 1  
Date\_ 20101025  
Time\_ 21.30  
INSTRUM spect  
PROBHD 5 mm PADUL 13C  
PULPROG zg30  
TD 65536  
SOLVENT CDC13  
NS 14  
DS 0  
SWH 10000.000 Hz  
FIDRES 0.152588 Hz  
AQ 3.2768500 sec  
RG 203  
DW 50.000 usec  
DE 6.50 usec  
TE 294.4 K  
D1 5.00000000 sec  
TD0 1

===== CHANNEL f1 =====  
NUC1 1H  
P1 14.83 usec  
PL1 0.00 dB  
PL1W 8.31434441 W  
SFO1 400.1316005 MHz  
SI 65536  
SF 400.1300079 MHz  
WDW EM  
SSB 0  
LB 0.30 Hz  
GB 0  
PC 1.00

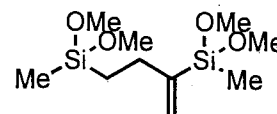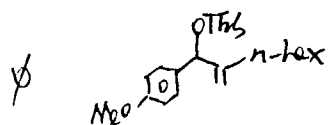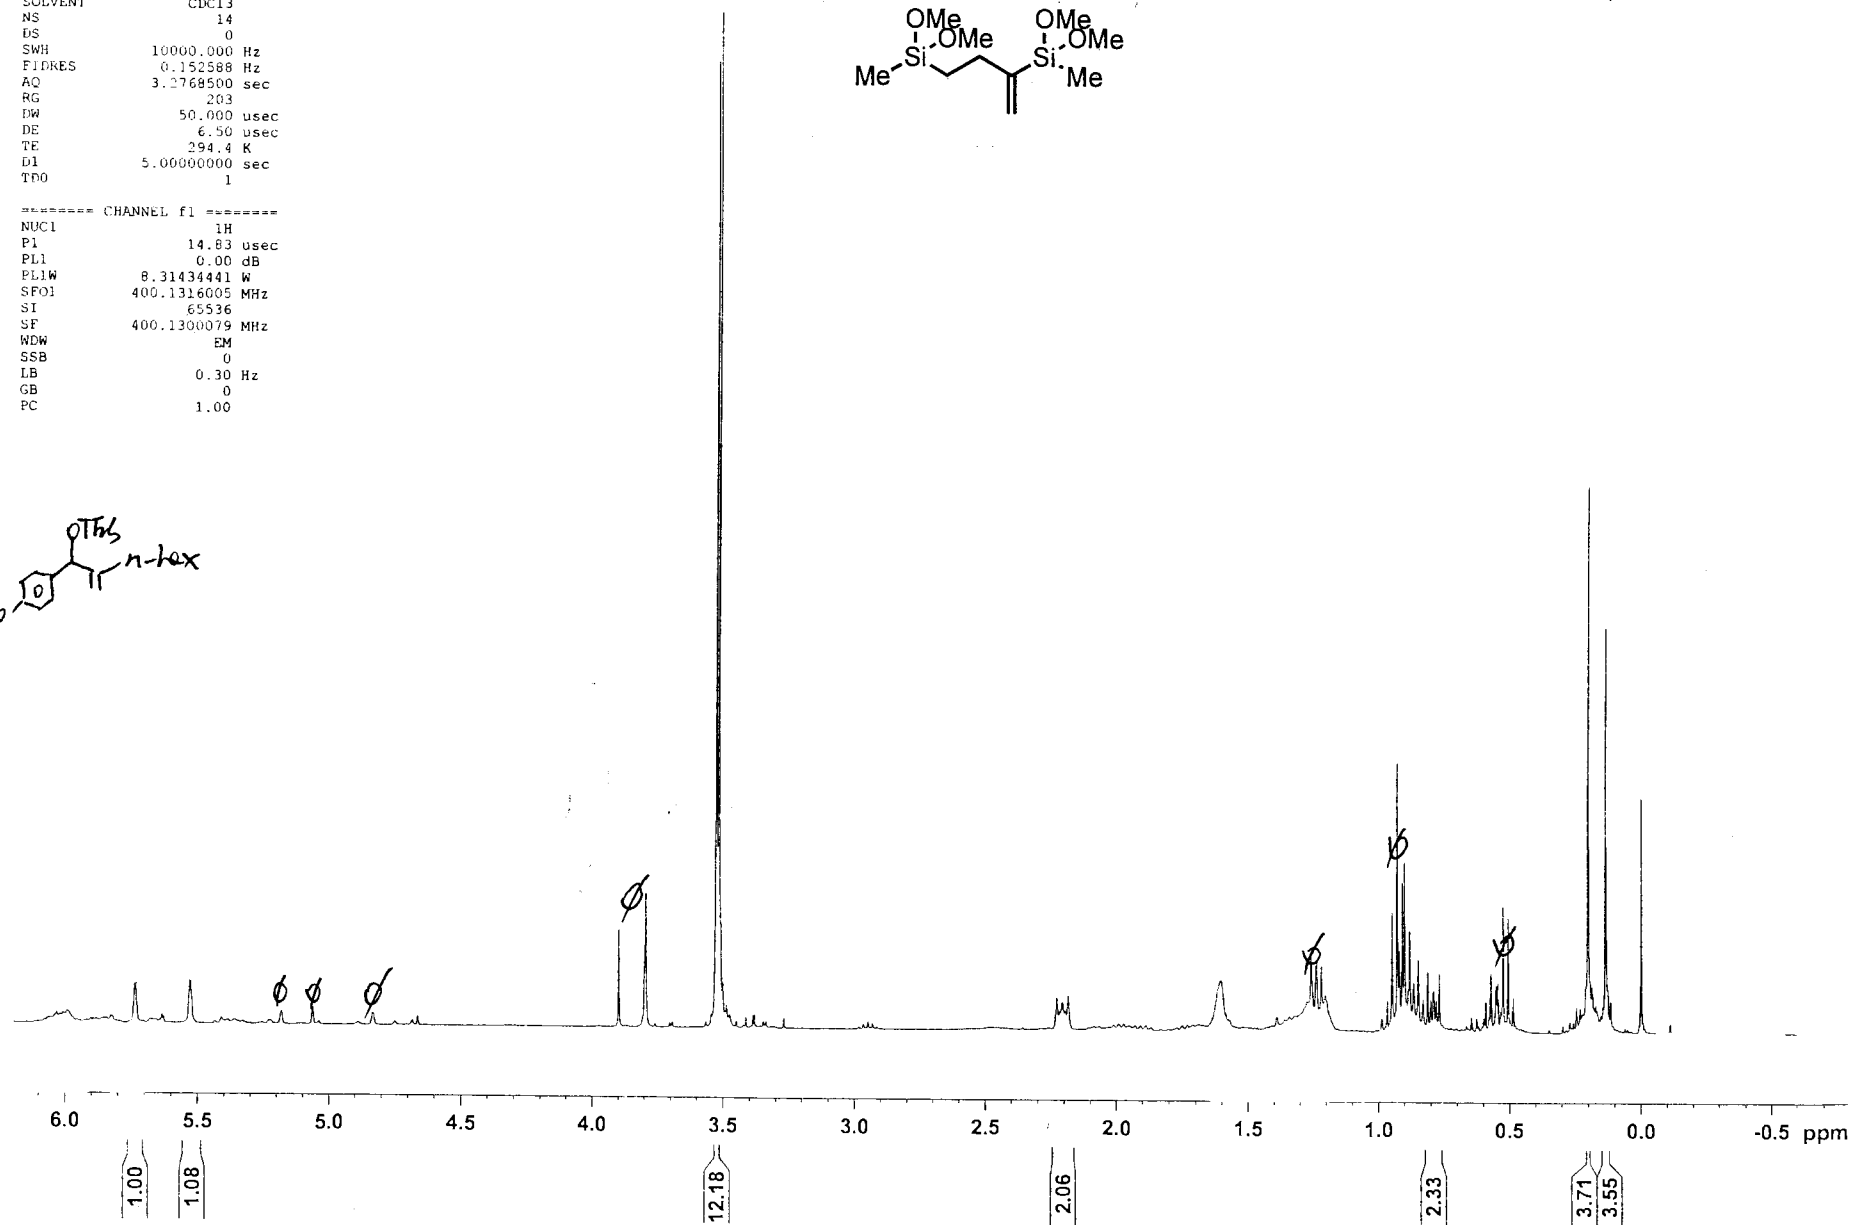

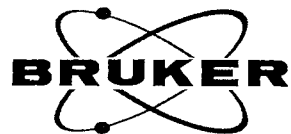

```

NAME      h1s-2-OMe2homo
EXPNO     2
PROCNO    1
Date_     20101025
Time      21.37
INSTRUM   spect
PROBHD    5 mm PADUL13C
PULPROG   zgpg30
TD         65536
SOLVENT   CDCl3
NS         546
DS         4
SWH        24038.461 Hz
FIDRES     0.366798 Hz
AQ         1.3631988 sec
RG         203
DW         20.800 usec
DE         6.50 usec
TE         294.9 K
D1         2.00000000 sec
D11        0.03000000 sec
TD0        1
  
```

```

===== CHANNEL f1 =====
NUC1       13C
P1         9.68 usec
PL1        -0.60 dB
PL1W       41.24164963 W
SFO1       100.6228298 MHz
  
```

```

===== CHANNEL f2 =====
CPDPRG2    waltz16
NUC2       1H
PCPD2      90.00 usec
PL2         0.00 dB
PL12       15.66 dB
PL13       15.92 dB
PL2W       8.31434441 W
PL12W      0.22585411 W
PL13W      0.21272963 W
SFO2       400.1316005 MHz
SI         32768
SF         100.6127546 MHz
WDW         EM
SSB         0
LB          1.00 Hz
GB          0
PC          1.40
  
```

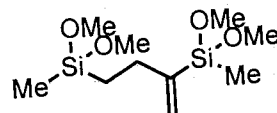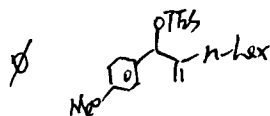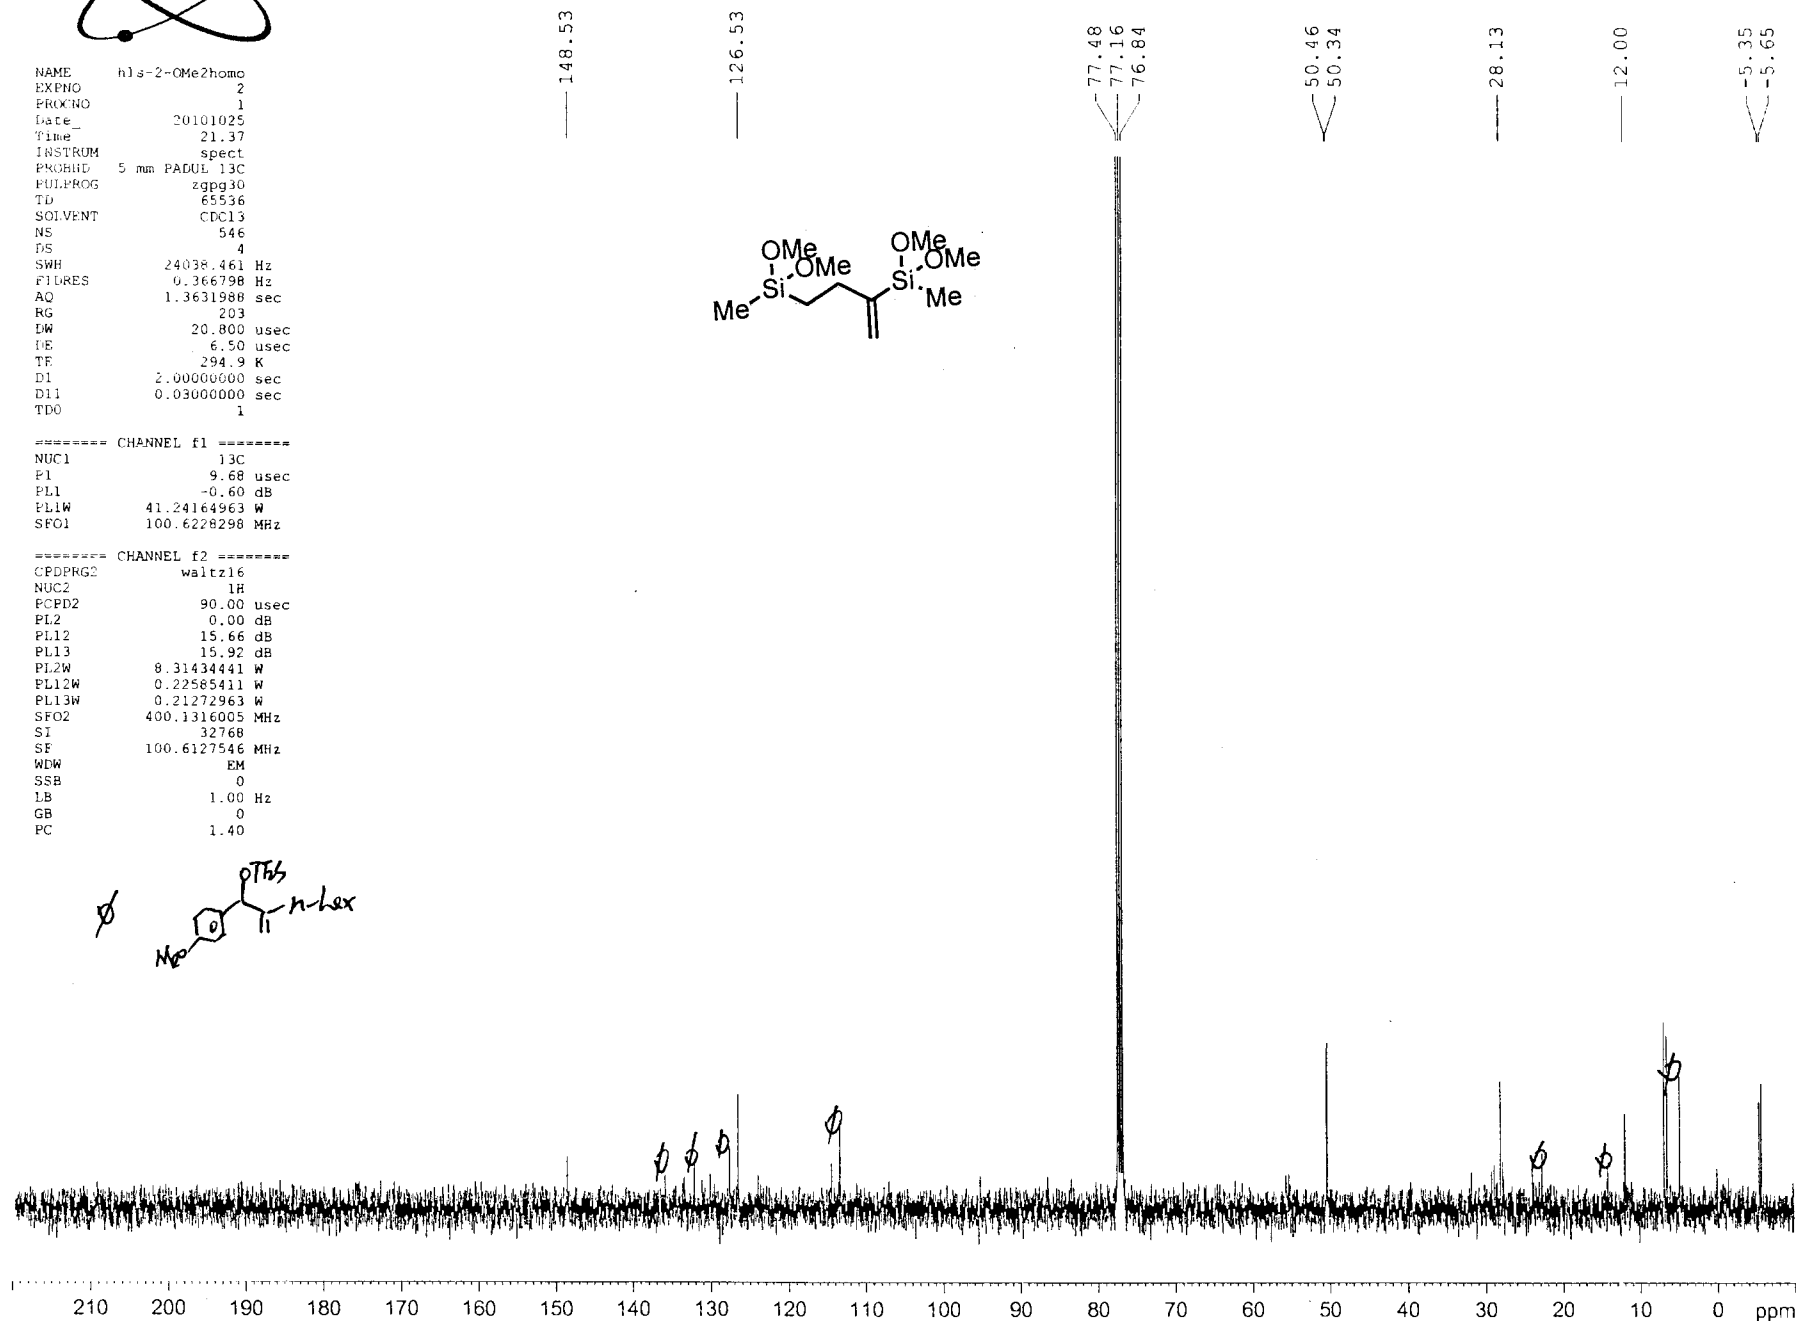

hls-2-26-2-t32  
NO 1  
OCNO 1  
Date 20101009  
Time 13.41  
INSTRUM spect  
PROBHD 5 mm PABBO BB-  
PULPROG zg30  
TD 65536  
SOLVENT CDCl3  
NS 18  
DS 1  
SWH 8223.685 Hz  
FIDRES 0.125483 Hz  
AQ 3.9846387 sec  
RG 64  
Dw 60.800 usec  
DE 6.50 usec  
TE 298.5 K  
P1 5.00000000 sec  
TDO 1

===== CHANNEL f1 =====  
NUC1 1H  
P1 14.00 usec  
PL1 -1.00 dB  
PL1W 13.56617069 W  
SP01 400.1924713 MHz  
S1 32768  
SF 400.1900218 MHz  
WDW EM  
SSB 0  
LB 0.30 Hz  
GB 0  
PC 1.00

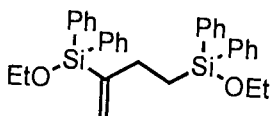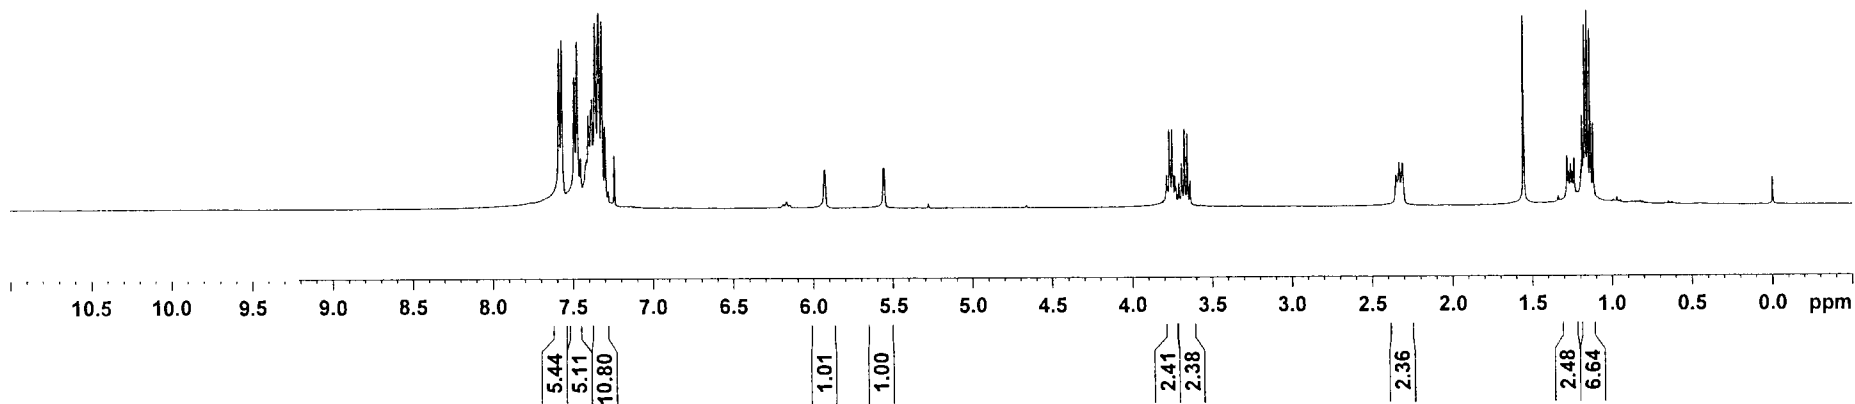

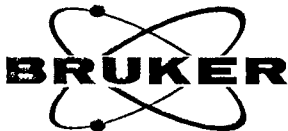

NAME hls-2-26-2-t32  
EXPNO 2  
PROCNO 1  
Date\_ 20101009  
Time 13.47  
INSTRUM spect  
PROBHD 5 mm PARBO BB-  
PULPROG zgpg30  
TD 65536  
SOLVENT CDCl3  
NS 101  
DS 4  
SWH 24038.461 Hz  
FIDRES 0.366798 Hz  
AQ 1.3631988 sec  
RG 181  
LW 20.800 usec  
DE 6.50 usec  
TE 299.1 K  
D1 2.00000000 sec  
F11 0.03000000 sec  
TD0 1

===== CHANNEL f1 =====  
NUC1 13C  
P1 9.90 usec  
PL1 -2.00 dB  
PL1W 55.33689499 W  
SFO1 100.6379183 MHz

===== CHANNEL f2 =====  
CPDPRG2 waltz16  
NUC2 1H  
PCPD2 90.00 usec  
PL2 -1.00 dB  
PL12 15.16 dB  
PL13 18.62 dB  
PL2W 13.56617069 W  
PL12W 0.32844096 W  
PL13W 0.14806664 W  
SFO2 400.1916008 MHz  
SI 32768  
SF 100.6278442 MHz  
WDW EM  
SSB 0  
LB 1.00 Hz  
GB 0  
PC 1.40

149.51  
135.31  
135.24  
134.86  
134.75  
134.61  
130.03  
129.90  
129.83  
129.63  
128.52  
127.95  
127.90  
127.76

77.48  
77.16  
76.85

59.72  
59.33

29.09

18.49

13.38

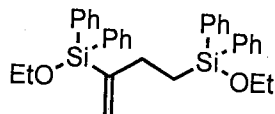



NAME hls-2-10-7-t4  
EXPNO 1  
PROCNO 1  
Date\_ 20100828  
Time 19.36  
INSTRUM spect  
PROBHD 5 mm PABBO BB-  
PULPROG zg30  
TD 65536  
SOLVENT CDCl3  
NS 3  
DS 2  
SWH 8223.685 Hz  
FIDRES 0.125483 Hz  
AQ 3.9846387 sec  
RG 50.8  
DW 60.800 usec  
DE 6.50 usec  
TE 297.9 K  
D1 10.00000000 sec  
TD0 1

----- CHANNEL f1 -----  
NUC1 1H  
P1 14.00 usec  
PL1 -1.00 dB  
PL1W 13.56617069 W  
SFO1 400.1924713 MHz  
SI 32768  
SF 400.1900142 MHz  
WDW EM  
SSB 0  
LB 0.30 Hz  
GB 0  
PC 1.00

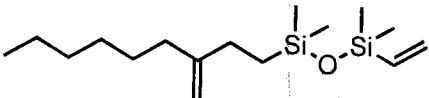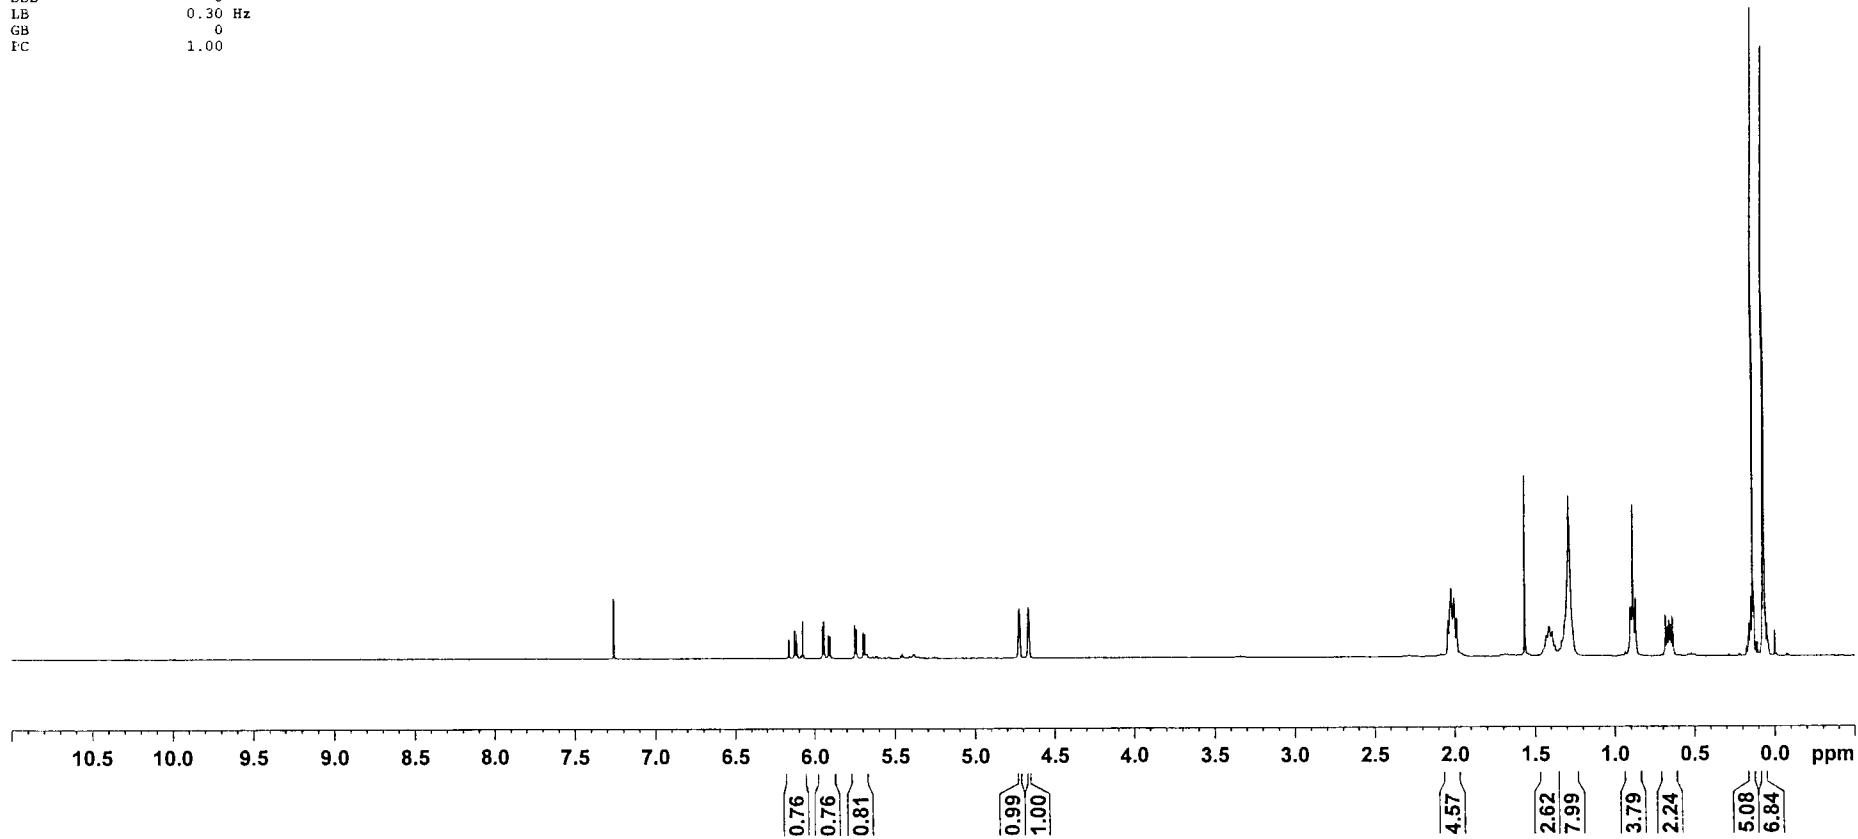

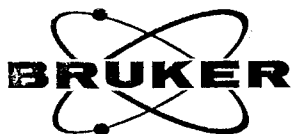

NAME hls-2-10-7-t4  
EXPNO 2  
PROCNO 1  
Date\_ 20100828  
Time\_ 19.39  
INSTRUM spect  
PROBHD 5 mm PABBO BB-  
PULPROG zgpg30  
TD 65536  
SOLVENT CDC13  
NS 31  
DS 4  
SWH 24038.461 Hz  
FIDRES 0.366798 Hz  
AQ 1.3631988 sec  
RG 181  
DW 20.800 usec  
DE 6.50 usec  
TE 298.4 K  
D1 2.00000000 sec  
D11 0.03000000 sec  
TD0 1

===== CHANNEL f1 =====  
NUC1 13C  
P1 9.90 usec  
PL1 -2.00 dB  
PL1W 55.33689499 W  
SFO1 100.6379183 MHz

===== CHANNEL f2 =====  
CPDPRG2 waltz16  
NUC2 1H  
PCPD2 90.00 usec  
PL2 -1.00 dB  
PL12 15.16 dB  
PL13 18.62 dB  
PL12W 13.56617069 W  
PL12W 0.32844096 W  
PL13W 0.14806664 W  
SFO2 400.1916008 MHz  
S1 32768  
SF 100.6278419 MHz  
WDW EM  
SSB 0  
LB 1.00 Hz  
GB 0  
PC 1.40

— 152.77

— 139.79

— 131.67

— 107.41

77.48  
77.16  
76.84

36.00  
31.95  
29.66  
29.60  
29.30  
27.97  
22.80  
16.67  
16.63  
14.25

0.57  
0.45  
0.43

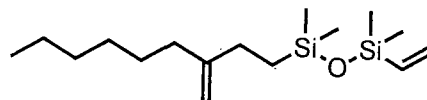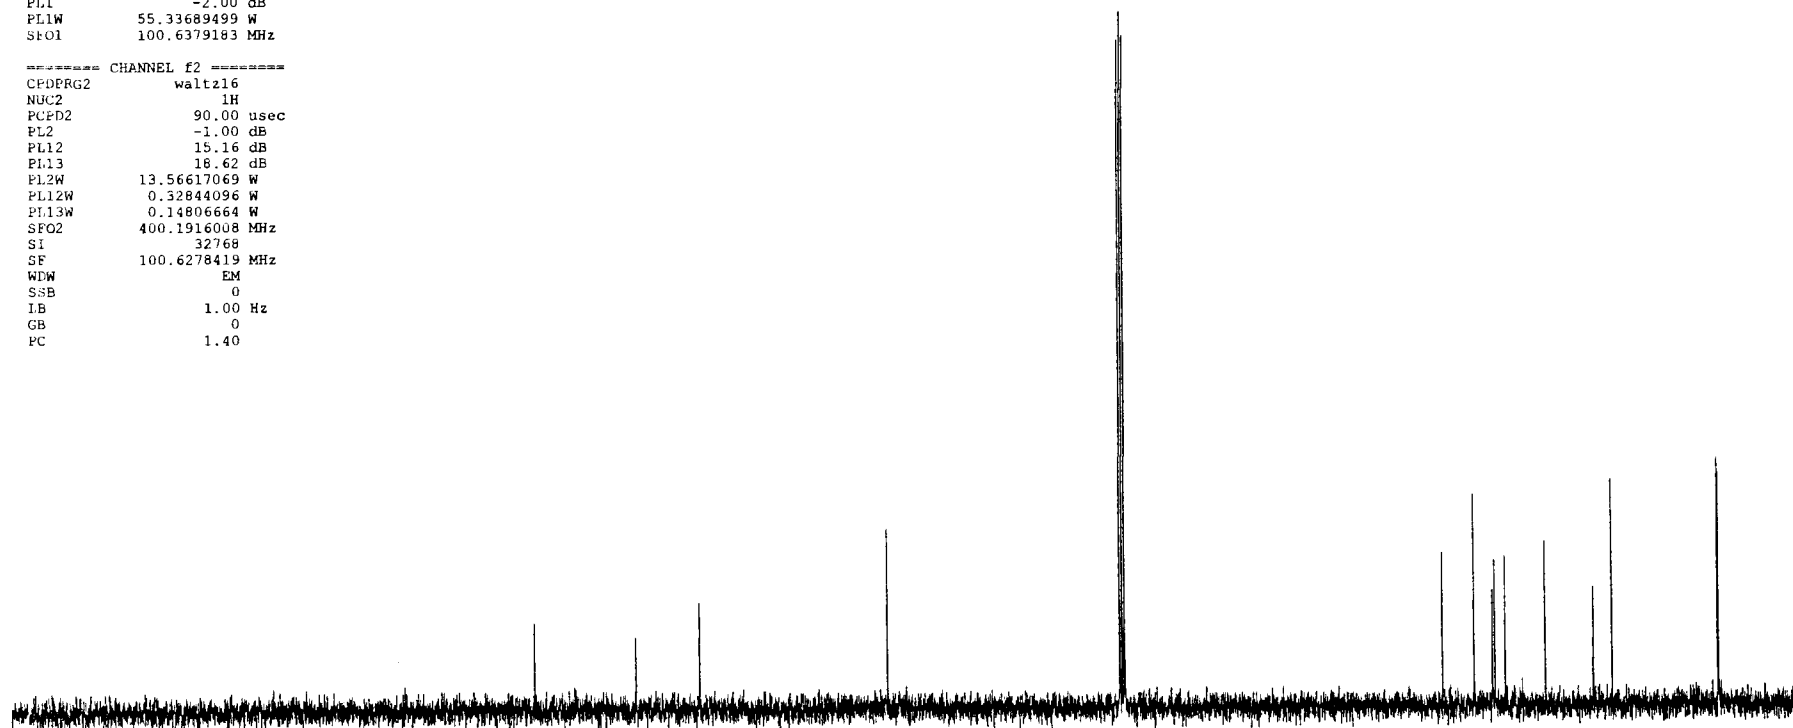

210 200 190 180 170 160 150 140 130 120 110 100 90 80 70 60 50 40 30 20 10 0 ppm



|         |                |      |
|---------|----------------|------|
| NAME    | hls-2-10-8-t8  |      |
| EXPNO   | 2              |      |
| PROCNO  | 1              |      |
| Date_   | 20100828       |      |
| Time    | 19.57          |      |
| INSTRUM | spect          |      |
| PROBHD  | 5 mm FABBO BB- |      |
| PULPROG | zgpg30         |      |
| TD      | 65536          |      |
| SOLVENT | CDC13          |      |
| NS      | 150            |      |
| DS      | 4              |      |
| SWH     | 24038.461      | Hz   |
| FIDRES  | 0.366798       | Hz   |
| AQ      | 1.3631988      | sec  |
| RG      | 181            |      |
| LW      | 20.800         | usec |
| DE      | 6.50           | usec |
| TE      | 298.4          | K    |
| D1      | 2.00000000     | sec  |
| D11     | 0.03000000     | sec  |
| TD0     | 1              |      |

```
===== CHANNEL f1 =====
NUC1                13C
P1                  9.90 usec
PL1                 -2.00 dB
PL1W                55.33689499 W
SFO1                100.6379183 Mhz
```

```

===== CHANNEL f2 =====
CPDRFG2      wait1216
NOC2          1H
PCPD2        90.00 usec
PL2          -1.00 dB
PL12         15.16 dB
PL13         18.62 dB
PL2W         13.56617069 W
PL12W        0.32844096 W
PL13W        0.14806664 W
SF02         400.1916008 MHz
ST           32768
SF           100.6278420 MHz
WDW          EM
SSB          0
LB           1.00 Hz
GB           0
FC           1.40

```

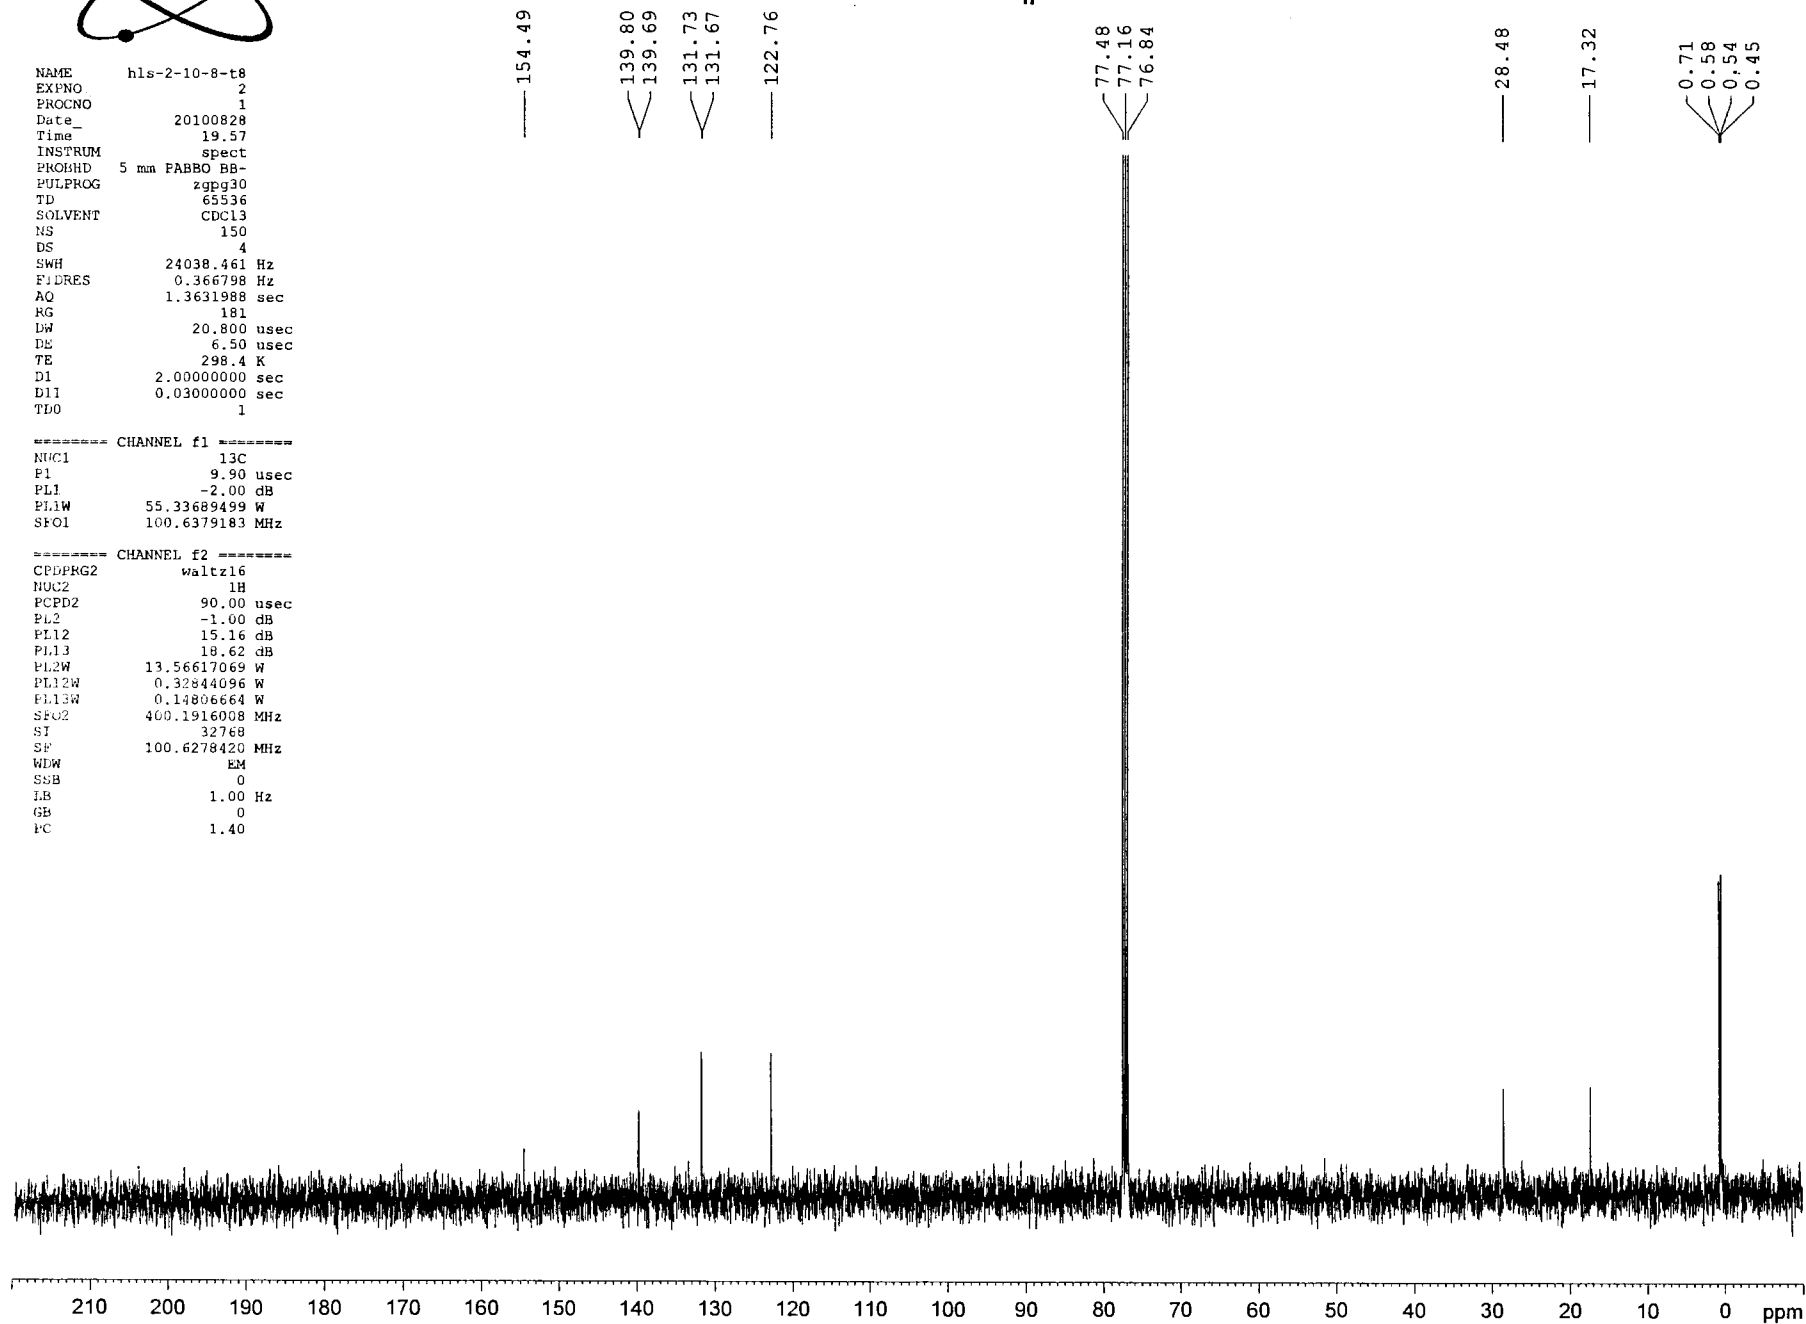

NAME: 118-2-36-2-143  
EXPNO: 1  
PROCNO: 1  
DATE\_: 20101123  
TIME: 21.14  
INSTRUM: spect  
PROBHD: 5 mm PABUL 13C  
PULPROG: zgpg30  
TD: 65536  
SOLVENT: CDCl3  
NS: 9  
DS: 0  
SWH: 10100.000 Hz  
FIDRES: 0.151582 Hz  
AQ: 3.2768500 sec  
RG: 203  
RW: 50.000 usec  
DE: 1.50 usec  
TE: 294.2 K  
SI: 5.0000000 sec  
TDC: 1

===== CHANNEL f1 =====  
NUC1: 13C  
P1: 14.00 usec  
PL1: 0.00 dB  
PL1W: 8.31434441 W  
SP01: 400.1316000 MHz  
SI: 65536  
SF: 400.1300385 MHz  
WDW: EM  
GB: 0  
LB: 0.40 Hz  
GB: 0  
PC: 1.00

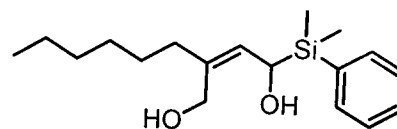

$Z:E = 67:33$

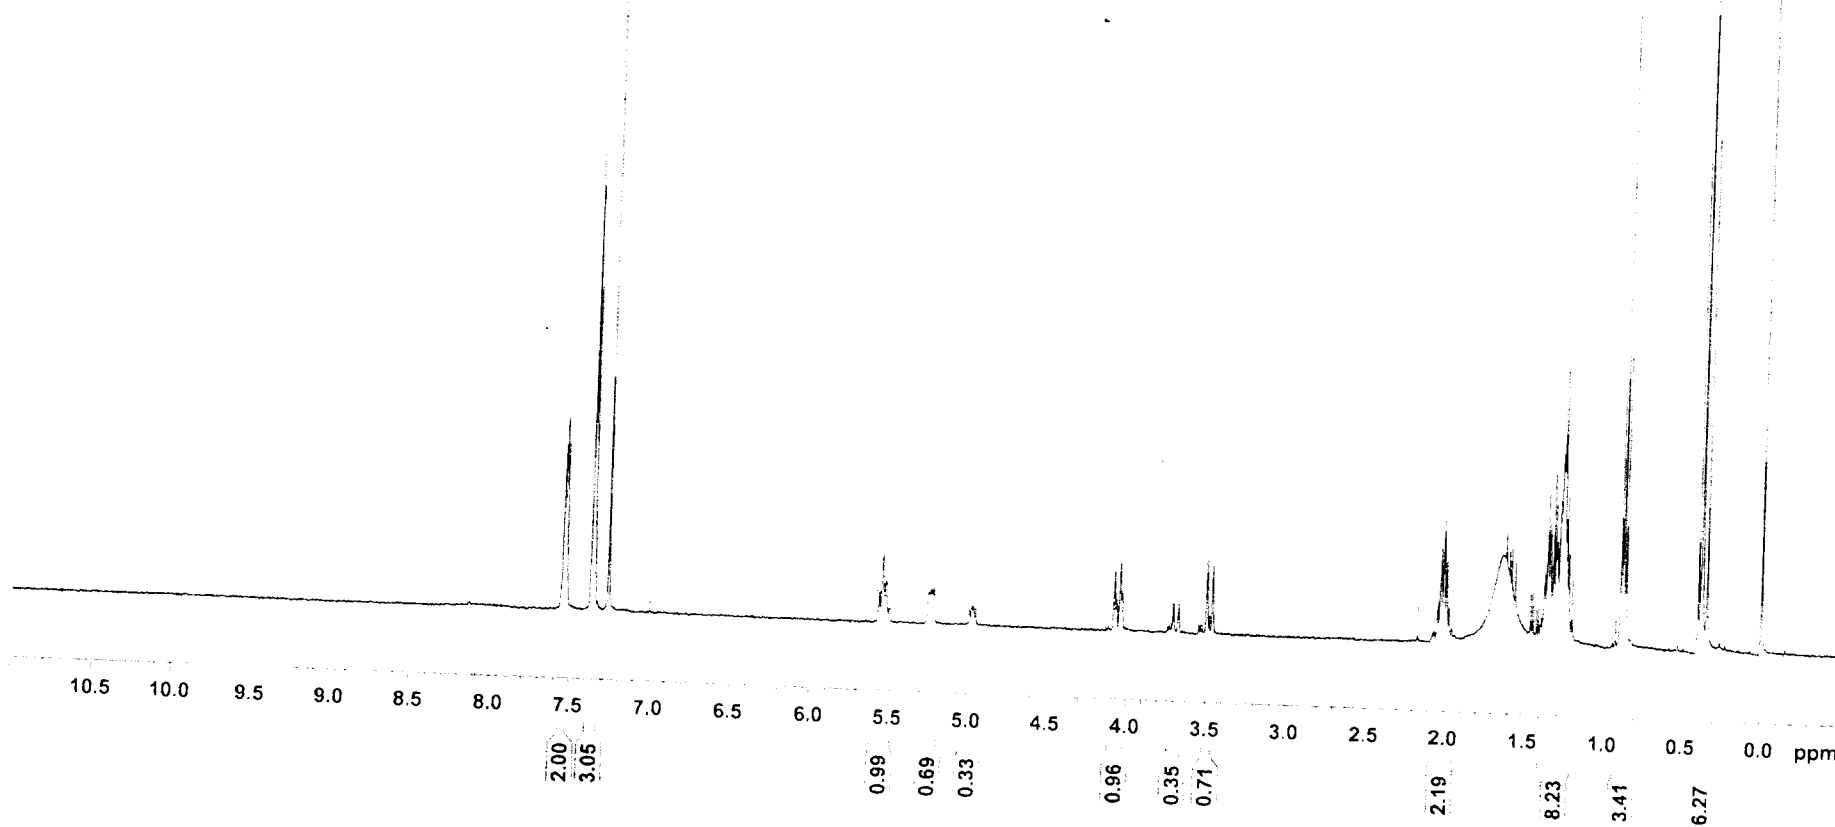

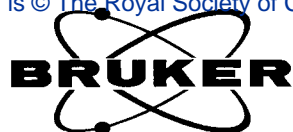

```
NAME      hls-2-39-2-t43
EXPNO     2
PROCNO    1
Date_     20101201
Time      22.14
INSTRUM   spect
PROBHD    5 mm PABBO BB-
PULPROG   zgpg30
TD        65536
SOLVENT   CDCl3
NS        11914
DS        4
SWH       24038.461 Hz
FIDRES    0.366798 Hz
AQ        1.3631988 sec
RG        161
DW        20.800 usec
DE        6.50 usec
TE        299.1 K
D1        2.00000000 sec
D11       0.03000000 sec
TD0       1
```

```
===== CHANNEL f1 =====
NUC1      13C
P1        9.90 usec
PL1       -2.00 dB
PL1W      55.33689499 W
SFO1      100.6379183 MHz
```

```
===== CHANNEL f2 =====
CPDPRG2   waltz16
NUC2      1H
PCPD2     90.00 usec
PL2       -1.00 dB
PL12      15.16 dB
PL13      18.62 dB
PL2W      13.56617069 W
PL12W     0.32844096 W
PL13W     0.14806664 W
SFO2      400.1916008 MHz
SI        32768
SF        100.6278420 MHz
WDW       EM
SSB       0
LB        1.00 Hz
GB        0
PC        1.40
```

138.89  
137.08  
136.55  
133.83  
133.79  
129.48  
129.25  
129.18  
128.72  
127.99

88.65  
84.55  
77.48  
77.16  
76.84

58.92  
58.67

31.58  
29.64  
29.50  
28.96  
28.91  
25.88  
22.76  
22.61  
14.13

0.14  
-1.54  
-1.67  
-2.24

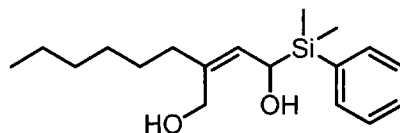

Z:E = 67:33

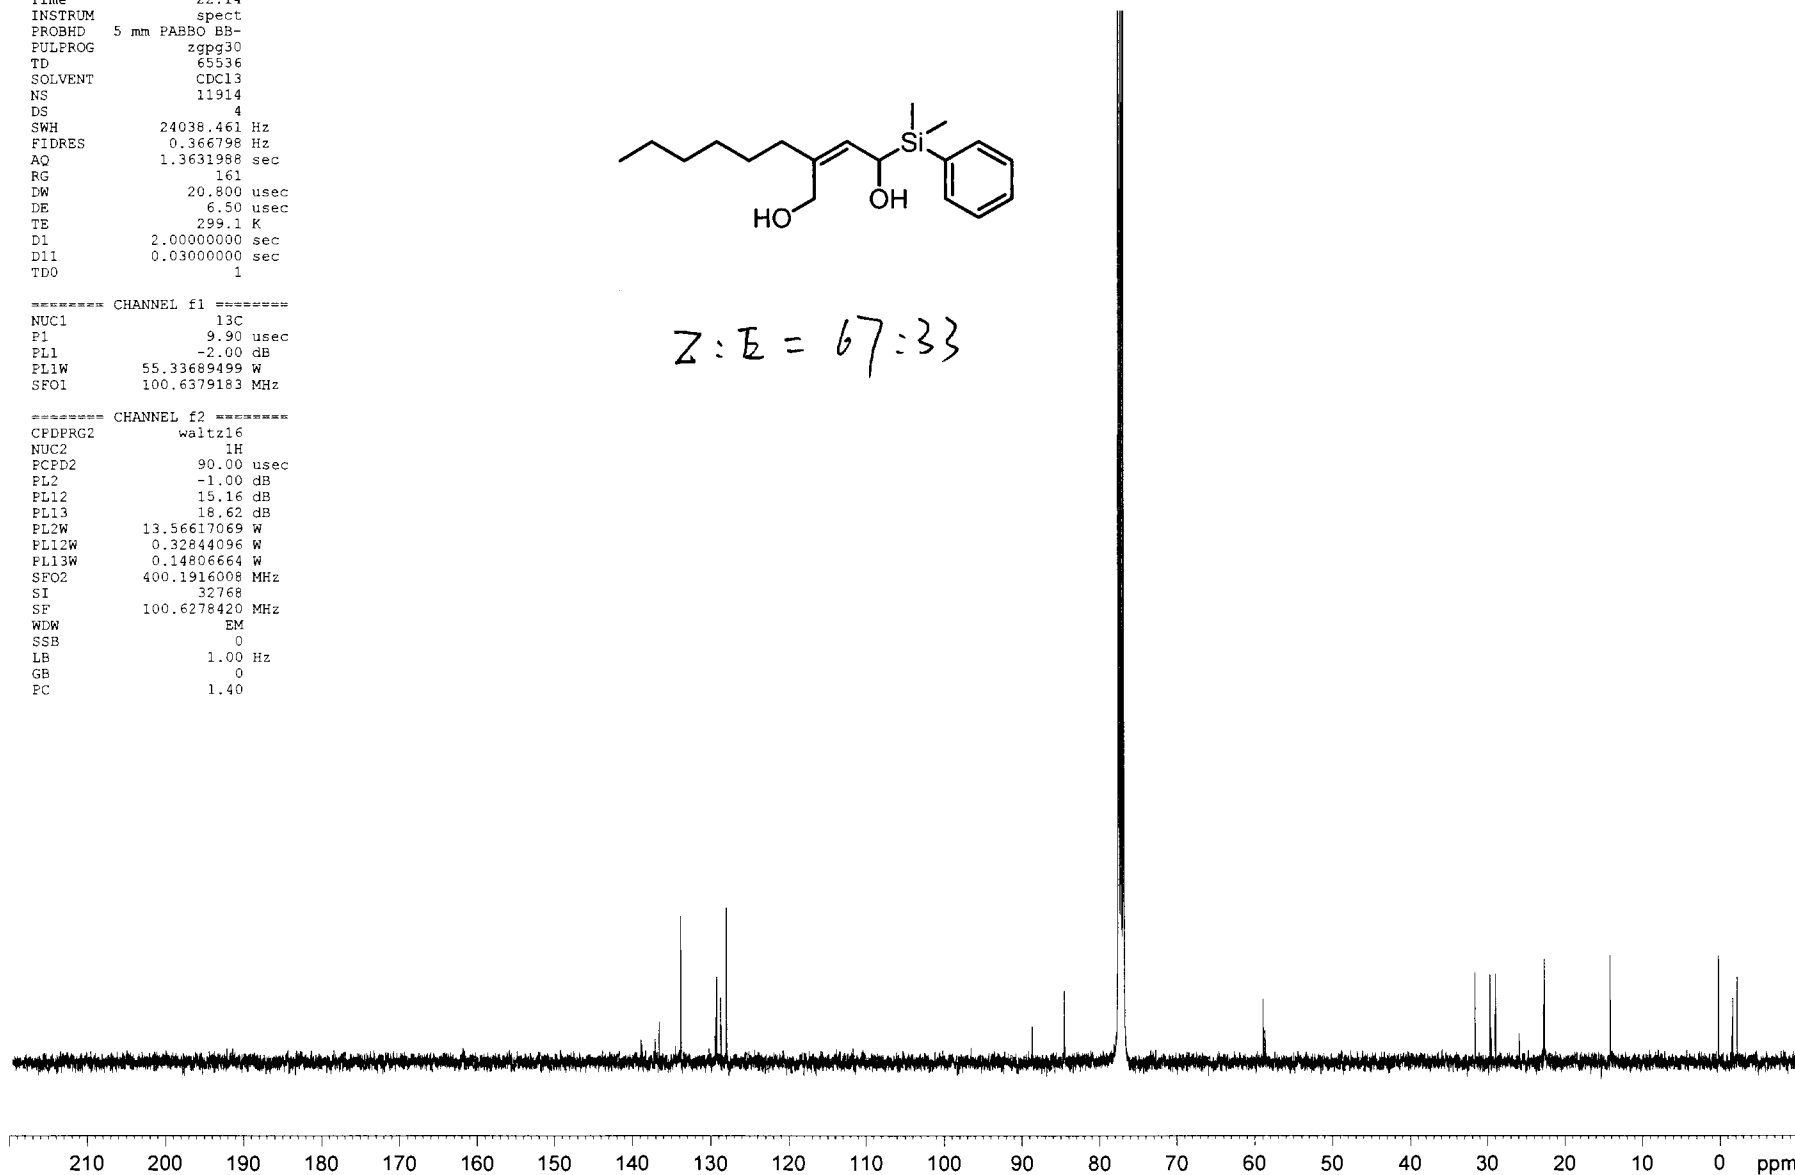

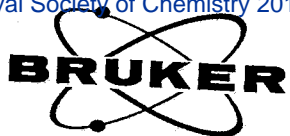

```

NAME his-2-39-2-t43
EXPNO 3
PROCNO 1
Date_ 20101122
Time 21.32
INSTRUM spect
PROBHD 5 mm PADUL 13C
PULPROG dept135
TD 65536
SOLVENT CDC13
NS 1060
DS 4
SWH 24038.461 Hz
FIDRES 0.366798 Hz
AQ 1.3631988 sec
RG 203
DW 20.800 usec
DE 6.50 usec
TE 295.7 K
CNST2 145.0000000
SI 2.00000000 sec
E2 0.00344828 sec
D12 0.00002000 sec
TDO 1

```

```

===== CHANNEL f1 =====
NUC1 13C
P1 9.68 usec
P2 19.36 usec
PL1 -0.60 dB
PL1W 41.24164963 W
SFO1 100.6228298 MHz

```

```

===== CHANNEL f2 =====
CPDPRG2 waltz16
NUC2 1H
P3 14.83 usec
P4 29.66 usec
PCPD2 90.00 usec
PL2 0.00 dB
PL12 15.66 dB
PL2W 8.31434441 W
PL12W 0.22585411 W
SFO2 400.1316005 MHz
SI 32768
SF 100.6127550 MHz
W1W EM
SSB 0
LB 1.00 Hz
GB 0
PC 1.40

```

133.78  
129.24  
128.73  
127.98

84.57

77.36

58.90  
58.63

31.58  
29.64  
28.91  
22.72  
22.62

14.14

1.68  
2.25

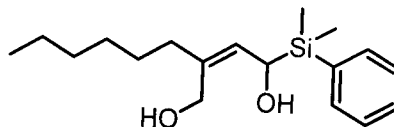

Z:E = 67:33

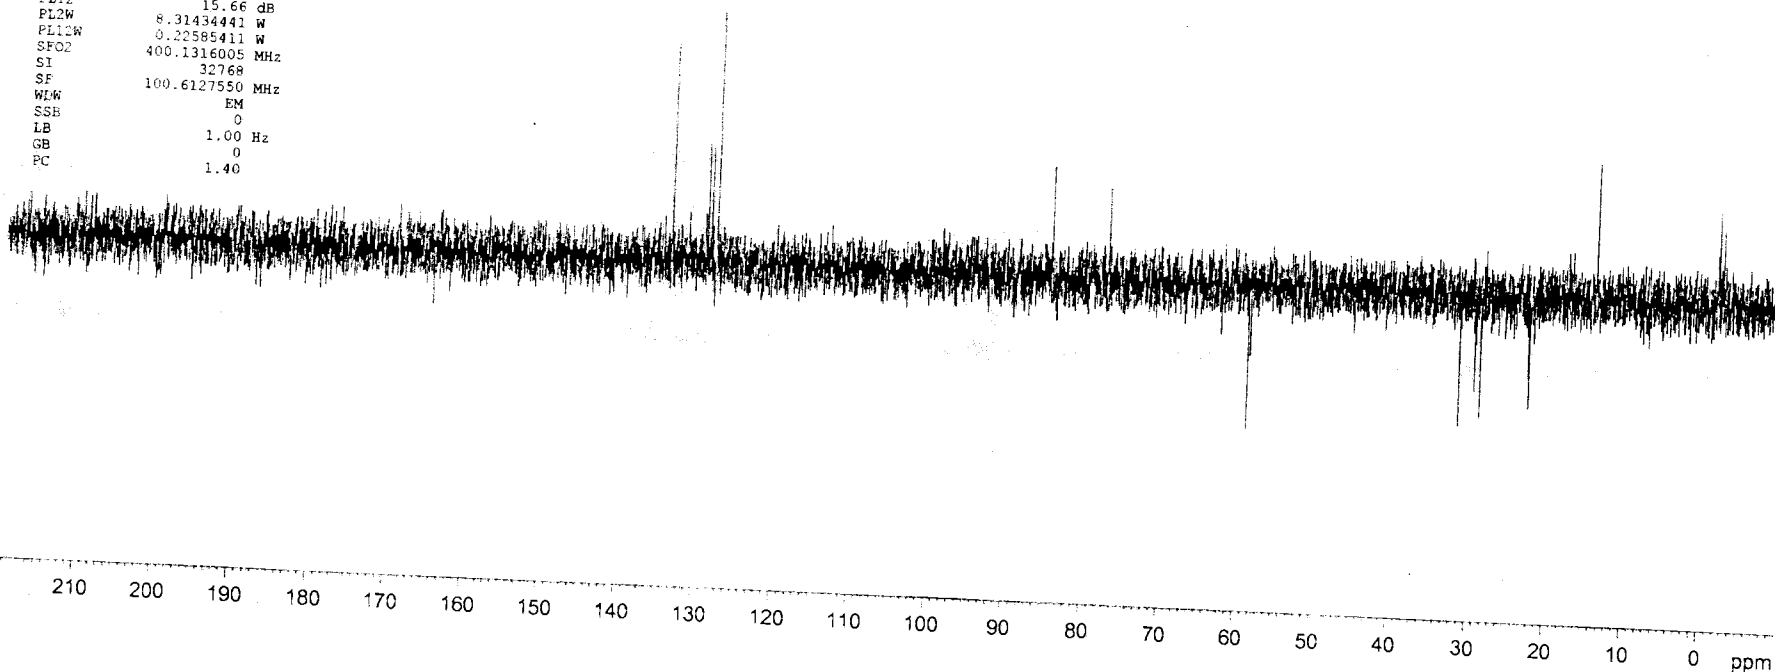

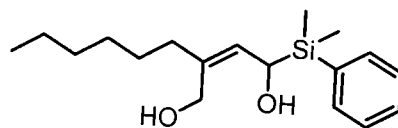

Z:E = 67:33

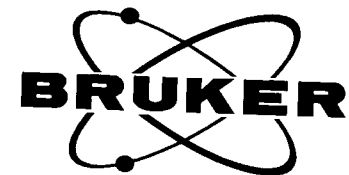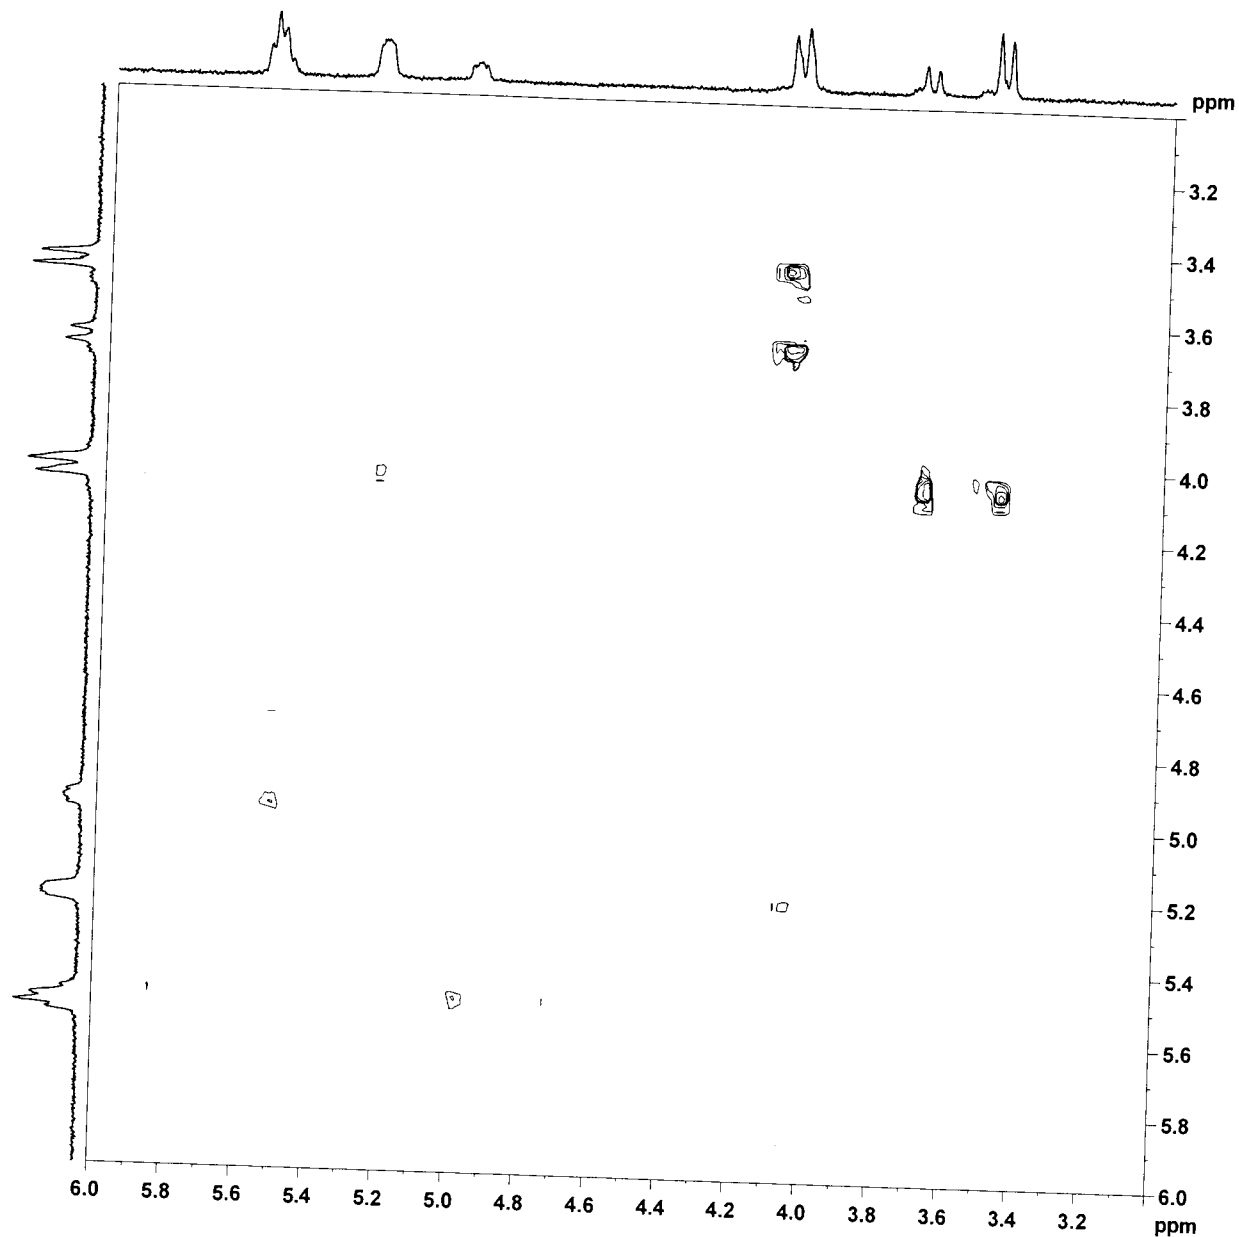

```

NAME      hls-2-39-2-t43
EXPNO     6
PROCNO    1
Date_     20101124
Time      12.29
INSTRUM   spect
PROBHD    5 mm PABBO BB-
PULPROG   noesyph
TD        2048
SOLVENT   CDCl3
NS        16
DS        4
SWH       4084.967 Hz
FIDRES    1.994613 Hz
AQ        0.2507252 sec
RG        64
DW        122.400 usec
DE        6.50 usec
TE        296.4 K
D0        0.00010456 sec
D1        2.00000000 sec
D8        0.30000001 sec
IN0       0.00024475 sec
  
```

```

===== CHANNEL f1 =====
NUC1      1H
P1        14.00 usec
PL1       -1.00 dB
PL1W      13.56617069 W
SFO1      400.1918421 MHz
ND0       1
TD        55
SFO1      400.1918 MHz
FIDRES    74.283272 Hz
SW        10.209 ppm
FnMODE    States-TPPI
SI        1024
SF        400.1900131 MHz
WDW       QSINE
SSB       2
LB        0.00 Hz
GB        0
PC        1.00
SI        1024
MC2       States-TPPI
SF        400.1900128 MHz
WDW       QSINE
SSB       2
LB        0.00 Hz
GB        0
  
```
